# Supplementary material for: Reductive generation of stable, five-membered N,N′-diamidocarbenes
Source: Royal Society of Chemistry journal article supplement (doi:10.1039/c4cc00846d), 2014-01-01
Supplement: c4cc00846d1.pdf [file c4cc00846d1.pdf]

# Supporting Information

## Reductive Generation of Stable, Five-Membered *N,N'*-Diamidocarbenes

*Jonathan P. Moerdyk and Christopher W. Bielawski\**

Department of Chemistry, University of Texas at Austin, Austin, Texas 78712

### Table of Contents

|                                                                                              |                |
|----------------------------------------------------------------------------------------------|----------------|
| <b>Synthetic Details</b>                                                                     | <b>S2-S6</b>   |
| <b>General Considerations</b>                                                                | <b>S2</b>      |
| <b>Procedures</b>                                                                            | <b>S2-S6</b>   |
| <b>X-Ray Crystallography</b>                                                                 | <b>S6-S10</b>  |
| <b>Figure S1.</b> ORTEP diagram of <b>1a</b> .                                               | <b>S7</b>      |
| <b>Figure S2.</b> ORTEP diagram of <b>1b</b> .                                               | <b>S7</b>      |
| <b>Figure S3.</b> ORTEP diagram of <b>3</b> .                                                | <b>S8</b>      |
| <b>Figure S4.</b> ORTEP diagram of <b>4</b> .                                                | <b>S8</b>      |
| <b>Figure S5.</b> ORTEP diagram of <b>5</b> .                                                | <b>S9</b>      |
| <b>Figure S6.</b> ORTEP diagram of <b>7</b> .                                                | <b>S9</b>      |
| <b>Table S1.</b> Summary of crystal data, data collection, and structure refinement details. | <b>S10</b>     |
| <b>Table S2.</b> Summary of crystal data, data collection, and structure refinement details. | <b>S11</b>     |
| <b><sup>1</sup>H and <sup>13</sup>C NMR Spectra</b>                                          | <b>S12-S42</b> |
| <b>DFT Calculations</b>                                                                      | <b>S43-S50</b> |
| <b>Table S3.</b> Summary of calculated structures and thermodynamic values.                  | <b>S43</b>     |
| <b>Tables S4-S11.</b> Cartesian coordinates for various carbenes and ketenes.                | <b>S44-S50</b> |
| <b>References</b>                                                                            | <b>S50</b>     |

**General Considerations.** All procedures were performed using standard Schlenk techniques under an atmosphere of nitrogen or in a nitrogen-filled glove box unless otherwise noted. Compounds **1** and **2** are highly moisture sensitive. *N,N'*-di-*tert*-butylcarbodiimide was purchased from Sigma Aldrich. Bromotriphenylphosphonium bromide<sup>S1</sup> was synthesized according to literature procedures. *N*-adamantyl-*N'*-*tert*-butylcarbodiimide<sup>S2</sup> was prepared using the methods reported by Palomo.<sup>S3</sup> Methyl acrylate, methyl vinyl ketone, 1-phenyl-1-butyne, 4-methyl anisole, and 4-chlorotoluene were dried over molecular sieves for at least 24 h prior to use. Toluene, tetrahydrofuran, benzene, diethyl ether, and pentane were dried and degassed using a Vacuum Atmospheres Company solvent purification system and stored over molecular sieves. Infrared (IR) spectra were recorded on a Perkin Elmer Spectrum BX FTIR spectrometer. High resolution mass spectra (HRMS) were obtained with a Waters Micromass Autospec-Ultima (CI). UV-vis spectra were acquired on a Perkin Elmer Lambda 35 UV-vis spectrometer. NMR spectra were recorded on a Varian Mercury 400, a Varian Directdrive 400, or an Agilent MR400 spectrometer. Chemical shifts ( $\delta$ ) are reported in ppm relative to the residual solvent (benzene: <sup>1</sup>H: 7.15 ppm, <sup>13</sup>C: 128.0 ppm; chloroform: <sup>1</sup>H: 7.24 ppm, <sup>13</sup>C: 77.0 ppm). Elemental analyses were performed with a ThermoScientific Flash 2000 Organic Elemental Analyzer. Melting points were obtained using a Stanford Research Systems MPA100 OptiMelt automated melting point apparatus (ramp rate: 1 °C·min<sup>-1</sup>) and are uncorrected.

**Synthesis of *N,N'*-bis(1-adamantyl)carbodiimide.** A 100 mL Schlenk flask was charged with bromotriphenylphosphonium bromide (1.93 g, 4.57 mmol, 1.5 equiv), triethylamine (1.5 mL, 10.65 mmol, 3.5 equiv), dichloromethane (20 mL) and a stir bar. The heterogeneous mixture was cooled to 0 °C and *N,N'*-bis(1-adamantyl)urea (1.0 g, 3.0 mmol) added in four portions over 30 min. The resultant mixture was heated at 40 °C for 14 h during which time the solution became homogenous. After adding water (60 mL) to the red solution, the two layers were separated, and the aqueous layer was washed with dichloromethane (10 mL). The combined organic layers were dried over sodium sulfate and filtered. After removing the residual solvent under reduced pressure, the crude solid was extracted with diethyl ether and passed through a plug of silica gel using diethyl ether as the eluent. Concentration of the resultant solution afforded *N,N'*-bis(1-adamantyl)carbodiimide as a white solid (0.828 g, 2.67 mmol, 88%). m.p. = 310-312 °C. <sup>1</sup>H NMR (CDCl<sub>3</sub>, 399.68 MHz):  $\delta$  1.57-1.65 (m, 12 H), 1.75 (overlapping s, 12 H), 2.05 (bs, 6H). <sup>13</sup>C NMR (CDCl<sub>3</sub>, 100.50 MHz):  $\delta$  29.8, 36.0, 44.7, 54.9, 139.4. IR (KBr): 2901.8, 2848.8, 2108.3, 2037.5, 1352.7, 1300.5, 1079.8, 633.9 cm<sup>-1</sup>. HRMS (CI): [M-H]<sup>+</sup> calcd. for C<sub>21</sub>H<sub>29</sub>N<sub>2</sub>: 309.2331; Found: 309.2330. Anal. calcd. for C<sub>21</sub>H<sub>30</sub>N<sub>2</sub>: C, 81.24; H, 9.74; N, 9.02; Found: C, 80.97; H, 9.99; N, 9.15.

**Synthesis of **1a**.** Using a modified procedure reported by Zinner,<sup>S4</sup> a 100 mL Schlenk flask outfitted with a septum was charged with *N,N'*-di-*tert*-butylcarbodiimide (2.00 g, 12.96 mmol), dichloromethane (60 mL) and a stir bar. The resultant solution was cooled to 0 °C for 15 min whereupon oxalyl chloride (1.73 g, 1.17 mL, 13.6 mmol, 1.05 equiv) was added dropwise. The ice bath was removed and the solution was stirred for 1 h. Removal of the residual solvent under reduced pressure afforded **1a** as a white solid (3.63 g, 12.91 mmol, 99%). m.p. = 129-130 °C (decomp.) <sup>1</sup>H NMR (CDCl<sub>3</sub>, 400.27 MHz):  $\delta$  1.75 (s, 18H). <sup>1</sup>H NMR (C<sub>6</sub>D<sub>6</sub>, 400.09 MHz):  $\delta$  1.52 (s, 18H). <sup>13</sup>C NMR (CDCl<sub>3</sub>, 100.60 MHz):  $\delta$  28.0, 62.2, 101.7, 154.9. IR (KBr): 3458.9, 3002.5, 2975.8, 2940.1, 1757.7, 1483.3, 1368.8, 1295.4, 1174.1, 1129.7, 1019.9, 873.0, 771.4,

552.2 cm<sup>-1</sup>. HRMS (CI): [M+H]<sup>+</sup> calcd. for C<sub>11</sub>H<sub>19</sub>N<sub>2</sub>O<sub>2</sub><sup>35</sup>Cl<sub>2</sub>: 281.0824; Found: 281.0827. Anal. calcd. for C<sub>11</sub>H<sub>18</sub>Cl<sub>2</sub>N<sub>2</sub>O<sub>2</sub>: C, 46.99; H, 6.45; N, 9.96; Found: C, 46.96; H, 6.58; N, 10.23.

**Synthesis of 1b.** Using an adapted procedure reported by Zinner,<sup>S4</sup> a 25 mL Schlenk flask outfitted with a septum was charged with *N,N'*-bis(1-adamantyl)carbodiimide (0.500 g, 1.61 mmol), dichloromethane (10 mL) and a stir bar. To this solution, oxalyl chloride (0.225 g, 0.15 mL, 1.77 mmol, 1.1 eq) was added dropwise and the resultant mixture was stirred at ambient temperature for 1.5 h. After removing the residual solvent under reduced pressure, the resulting solid was washed with a minimal quantity of cold diethyl ether followed by a minimal quantity of pentane. Subsequent drying under reduced pressure afforded **1b** as a white solid (0.630 g, 1.44 mmol, 89%). m.p. = 200-202 °C (decomp.) <sup>1</sup>H NMR (CDCl<sub>3</sub>, 399.68 MHz): δ 1.68 (m, 6H), 1.78 (m, 6H), 2.17 (bs, 6H), 2.63 (overlapping s, 12H). <sup>13</sup>C NMR (CDCl<sub>3</sub>, 100.50 MHz): δ 30.1, 36.0, 38.7, 65.5, 101.8, 155.0. IR (KBr): 2914.9, 2851.9, 1758.0, 1457.1, 1376.8, 1359.0, 1343.2, 1263.8, 1200.8, 1124.5, 978.6, 866.3, 749.6 cm<sup>-1</sup>. HRMS (CI): [M-H]<sup>+</sup> calcd. for C<sub>23</sub>H<sub>29</sub>N<sub>2</sub>O<sub>2</sub><sup>35</sup>Cl<sub>2</sub>: 435.1606; Found: 435.1610. Anal. calcd. for C<sub>23</sub>H<sub>30</sub>N<sub>2</sub>O<sub>2</sub>Cl<sub>2</sub>: C, 63.16; H, 6.91; N, 6.40; Found: C, 63.45; H, 6.78; N, 6.41.

**Synthesis of 1c.** Using an adapted procedure reported by Zinner,<sup>S4</sup> a 50 mL Schlenk flask outfitted with a septum was charged with *N*-adamantyl-*N'*-*tert*-butylcarbodiimide (0.450 g, 1.94 mmol), dichloromethane (10 mL) and a stir bar. To the resulting solution was added dropwise oxalyl chloride (0.18 mL, 2.13 mmol, 1.1 equiv). After stirring the resulting mixture at ambient temperature for 1.5 h, the residual solvent was removed under reduced pressure. The resulting crude residue was washed twice with a minimal quantity of cold diethyl ether followed by minimal quantity of pentane (×2). Subsequent drying of the product under reduced pressure afforded **1c** as an off-white solid (0.427 g, 1.19 mmol, 61%). m.p. = 141-143 °C (decomp.) <sup>1</sup>H NMR (CDCl<sub>3</sub>, 399.68 MHz): δ 1.72 (m, 3H), 1.77-1.80 (m overlapping s, 12H), 2.18 (bs, 3H), 2.64 (overlapping s, 6H). <sup>13</sup>C NMR (CDCl<sub>3</sub>, 100.50 MHz): δ 28.2, 30.07, 35.97, 38.65, 62.35, 65.48, 101.78, 154.90, 155.13. IR (KBr): 2917.4, 2852.3, 1756.8, 1374.3, 1368.6, 1345.2, 1276.3, 1123.9, 741.2 cm<sup>-1</sup>. HRMS (CI): [M+H]<sup>+</sup> calcd. for C<sub>17</sub>H<sub>25</sub>N<sub>2</sub>O<sub>2</sub><sup>35</sup>Cl<sub>2</sub>: 359.1293; Found: 359.1289. Anal. calcd. for C<sub>17</sub>H<sub>24</sub>N<sub>2</sub>O<sub>2</sub>Cl<sub>2</sub>: C, 56.83; H, 6.73; N, 7.80; Found: C, 56.99; H, 6.74; N, 7.47.

**Synthesis of 2a.** A 30 mL vial was charged with **1a** (1.0 g, 3.56 mmol), tetrahydrofuran (10 mL), potassium metal (0.292 g, 7.47 mmol, 2.1 equiv) and a stir bar. The resulting solution was observed to rapidly turn red and form a precipitate over time at ambient temperature. After 3 h, the residual solvent was removed under reduced pressure and the crude solid was extracted with pentane (4 mL), filtered through a medium porosity fritted funnel, and then washed with pentane (2 × 2 mL). Concentration of the filtrate afforded **2a** as a bright red solid (0.567 g, 2.70 mmol, 76%). m.p. = 73-75 °C. <sup>1</sup>H NMR (C<sub>6</sub>D<sub>6</sub>, 400.09 MHz): δ 1.37 (s, 18H). <sup>13</sup>C NMR (C<sub>6</sub>D<sub>6</sub>, 100.60 MHz): δ 28.6, 58.6, 154.2, 287.2. IR (KBr): 2979.5, 2935.2, 1780.1, 1754.9, 1395.4, 1325.6, 1205.0, 1066.3, 996.6, 770.9, 572.3 cm<sup>-1</sup>. UV-vis (C<sub>5</sub>H<sub>12</sub>): λ<sub>max</sub> = 489 nm. HRMS (CI): [M+H]<sup>+</sup> calcd. for C<sub>11</sub>H<sub>19</sub>N<sub>2</sub>O<sub>2</sub>: 211.1447; Found: 211.1448. Anal. calcd. for C<sub>11</sub>H<sub>18</sub>N<sub>2</sub>O<sub>2</sub>: C, 62.83; H, 8.63; N, 13.32; Found: C, 62.76; H, 8.82; N, 13.50.

**Synthesis of 2b.** An 8 mL vial was charged with **1b** (0.200 g, 0.457 mmol), tetrahydrofuran (2 mL), potassium metal (0.038 g, 0.96 mmol, 2.1 equiv) and a stir bar. Stirring the resultant

mixture at ambient temperature for 2 h afforded a red solution that was accompanied by the formation of a precipitate. The reaction mixture was concentrated under reduced pressure, and the crude solid was extracted with benzene (5 mL), filtered through a medium fritted funnel, and washed with benzene (2 × 2 mL). Concentration of the filtrate afforded **2b** as a pale purple-red solid (0.103 g, 0.281 mmol, 61%). m.p. = 197-199 °C (decomp.) <sup>1</sup>H NMR (C<sub>6</sub>D<sub>6</sub>, 400.09 MHz): δ 1.49 (m, 6H), 1.55 (m, 6H), 1.95 (bs, 6H), 2.24 (overlapping s, 12H). <sup>13</sup>C NMR (C<sub>6</sub>D<sub>6</sub>, 400.09 MHz): δ 29.9, 36.3, 41.4, 59.5, 154.2, 288.0. IR (KBr): 2906.0, 2851.2, 1777.9, 1756.4, 1342.3, 1300.6, 1222.9, 1025.1, 668.0 cm<sup>-1</sup>. UV-vis (C<sub>5</sub>H<sub>12</sub>): λ<sub>max</sub> = 492 nm. HRMS (CI): [M+H]<sup>+</sup> calcd. for C<sub>23</sub>H<sub>31</sub>N<sub>2</sub>O<sub>2</sub>: 367.2386; Found: 367.2381. Anal. calcd. for C<sub>23</sub>H<sub>30</sub>N<sub>2</sub>O<sub>2</sub>: C, 75.37; H, 8.25; N, 7.64; Found: C, 75.50; H, 8.47; N, 7.83.

**Synthesis of 2c.** An 8 mL vial was charged with **1c** (0.150 g, 0.417 mmol), benzene (2 mL), potassium metal (0.035 g, 0.090 mmol, 2.1 equiv) and a stir bar. The reaction vessel was sealed and then heated at 60 °C for 2 h. After cooling to ambient temperature, the reaction mixture was concentrated under reduced pressure. The resulting red-purple residue was extracted with pentane, filtered through a 0.2 μm PTFE filter and the residual solvent removed under reduced pressure to afford **2c** as a purple-red solid (0.072 g, 0.250 mmol, 60%). m.p. = 96-98 °C (decomp.) <sup>1</sup>H NMR (C<sub>6</sub>D<sub>6</sub>, 399.68 MHz): δ 1.39 (s, 9H), 1.46-1.54 (m, 6H), 1.93 (bs, 3H), 2.20-2.21 (overlapping s, 6H). <sup>13</sup>C NMR (C<sub>6</sub>D<sub>6</sub>, 100.60 MHz): δ 28.6, 29.9, 36.2, 41.3, 58.6, 59.5, 154.1, 154.3, 287.5. IR (KBr): 2910.2, 1855.4, 1770.8, 1756.0, 1729.7, 1357.3, 1303.7, 1007.6 cm<sup>-1</sup>. UV-vis (C<sub>5</sub>H<sub>12</sub>): λ<sub>max</sub> = 491 nm. HRMS (CI): [M+H]<sup>+</sup> calcd. for C<sub>17</sub>H<sub>25</sub>N<sub>2</sub>O<sub>2</sub>: 289.1916; Found: 289.1913. Anal. calcd. for C<sub>17</sub>H<sub>24</sub>N<sub>2</sub>O<sub>2</sub>: C, 70.80; H, 8.39; N, 9.71; Found: C, 70.73; H, 8.53; N, 9.43.

**Synthesis of 3.** A 50 mL Schlenk flask was charged with **2a** (0.075 g, 0.36 mmol), pentane (10 mL) and a stir bar. The flask was cooled to -78 °C and the atmosphere was removed from the flask under reduced pressure prior to warming back to ambient temperature. Ammonia gas was then added to the flask via a balloon which resulted in the formation of a pale yellow solution that was accompanied with a white precipitate. After stirring for 30 min at ambient temperature, the residual solvent was removed under reduced pressure and the crude solid was washed with a minimal quantity of pentane to afford **3** as a white solid (0.072 g, 0.317 mmol, 89%). m.p. = 162-165 °C (decomp.) <sup>1</sup>H NMR (CDCl<sub>3</sub>, 400.09 MHz): δ 1.53 (s, 18H), 1.86 (bs, 2H), 5.64 (s, 1H). <sup>13</sup>C NMR (CDCl<sub>3</sub>, 100.60 MHz): δ 27.8, 55.8, 76.1, 157.9. IR (KBr): 3438.5, 3405.5, 3312.0, 2979.2, 1717.1, 1413.5, 1366.6, 1218.7, 1128.7, 598.7 cm<sup>-1</sup>. HRMS (CI): [M+H]<sup>+</sup> calcd. for C<sub>11</sub>H<sub>22</sub>N<sub>3</sub>O<sub>2</sub>: 228.1712; Found: 228.1712. Anal. calcd. for C<sub>11</sub>H<sub>21</sub>N<sub>3</sub>O<sub>2</sub>: C, 58.12; H, 9.31; N, 18.49; Found: C, 57.93; H, 9.36; N, 18.31.

**Synthesis of 4.** An 8 mL vial was charged with **2a** (0.075 g, 0.36 mmol), benzene (1 mL), methyl vinyl ketone (0.025 g, 0.36 mmol, 1 equiv) and a stir bar. The resultant mixture was stirred at ambient temperature for 12 h after which the residual solvent was removed under reduced pressure. Subsequent washing of the residue with a minimal quantity of pentane followed by drying under reduced pressure afforded **4** as a white solid (0.083 g, 0.296 mmol, 83%). m.p. = 159-161 °C (decomp.) <sup>1</sup>H NMR (CDCl<sub>3</sub>, 400.09 MHz): δ 1.52 (s, 18H), 1.82 (s, 3H), 3.07 (t, *J* = 2 Hz, 2H), 4.88 (s, 1H). <sup>13</sup>C NMR (CDCl<sub>3</sub>, 100.60 MHz): δ 14.2, 28.0, 41.5, 58.6, 97.3, 108.5, 154.5, 157.4. IR (KBr): 3115.1, 2999.6, 2964.7, 2917.3, 1739.9, 1691.8, 1407.2, 1394.8, 1368.4, 1195.0, 1158.8, 955.9, 909.2, 751.5, 584.9 cm<sup>-1</sup>. HRMS (CI): [M+H]<sup>+</sup>

calcd. for  $C_{15}H_{25}N_2O_3$ : 281.1865; Found: 281.1860. Anal. calcd. for  $C_{15}H_{24}N_2O_3$ : C, 64.26; H, 8.63; N, 9.99; Found: C, 64.64; H, 8.56; N, 10.01.

**Synthesis of 5.** An 8 mL vial was charged with **2a** (0.075 g, 0.36 mmol), benzene (1 mL), 1-phenyl-1-butyne (0.046 g, 0.36 mmol, 1 equiv) and a stir bar. The resultant mixture was stirred at ambient temperature for 6 h after which the residual solvent was removed under reduced pressure. Subsequent washing of the residue with pentane followed by drying under reduced pressure afforded **5** as a white solid (0.083 g, 0.243 mmol, 68%). m.p. = 161-163 °C (decomp.)  $^1H$  NMR ( $CDCl_3$ , 400.09 MHz):  $\delta$  1.34 (s, 18H), 1.45 (t,  $J$  = 7.4 Hz, 3H), 2.70 (q,  $J$  = 7.4 Hz, 2H), 7.41-7.49 (m, 5H).  $^{13}C$  NMR ( $CDCl_3$ , 100.60 MHz):  $\delta$  12.0, 19.64, 28.8, 57.4, 62.3, 122.1, 124.2, 126.4, 129.4, 129.6, 130.5, 159.82. IR (KBr): 3384.6, 3064.7, 3005.9, 2977.3, 2932.2, 1716.1, 1388.4, 1362.0, 1223.8, 1133.7, 766.8, 693.0, 559.6  $cm^{-1}$ . HRMS (CI):  $[M+H]^+$  calcd. for  $C_{21}H_{29}N_2O_2$ : 341.2229; Found: 341.2235. Anal. calcd. for  $C_{21}H_{28}N_2O_2$ : C, 74.08; H, 8.29; N, 8.23; Found: C, 73.75; H, 8.26; N, 7.95.

**Synthesis of 6.** An 8 mL vial was charged with **2a** (0.075 g, 0.36 mmol), benzene (1 mL), methyl acrylate (0.031 g, 0.36 mmol, 1 equiv) and a stir bar. The resultant mixture was stirred at ambient temperature for 12 h after which the residual solvent was removed under reduced pressure. Subsequent washing of the resulting residue with a minimal quantity of pentane followed by drying under reduced pressure afforded **6** as a white solid (0.079 g, 0.267 mmol, 75%). m.p. = 129-131 °C (decomp.)  $^1H$  NMR ( $CDCl_3$ , 400.09 MHz):  $\delta$  1.55 (s, 18H), 3.15 (s, 2H), 3.73 (s, 3H), 3.87 (s, 1H).  $^{13}C$  NMR ( $CDCl_3$ , 100.60 MHz):  $\delta$  28.0, 40.4, 56.8, 58.9, 65.7, 106.3, 157.3, 160.9. IR (KBr): 3126.7, 2991.6, 2967.6, 2945.7, 1740.4, 1689.6, 1409.4, 1333.7, 1317.9, 1279.7, 1244.2, 1194.7, 1163.8, 1005.3, 954.5, 922.5, 781.3  $cm^{-1}$ . HRMS (CI):  $[M+H]^+$  calcd. for  $C_{15}H_{25}N_2O_4$ : 297.1814; Found: 297.1817. Anal. calcd. for  $C_{15}H_{24}N_2O_4$ : C, 60.79; H, 8.16; N, 9.45; Found: C, 60.51; H, 8.02; N, 9.09.

**Synthesis of 7.** An 8 mL vial was charged with **2a** (0.075 g, 0.36 mmol), benzene (1 mL), toluene (0.164 g, 1.78 mmol, 5 equiv) and a stir bar. The resultant mixture was stirred at 80 °C for 40 h after which the reaction mixture was cooled and the residual solvent was removed under reduced pressure. Subsequent washing of the residue with a minimal quantity of pentane followed by drying under reduced pressure afforded **7** as a white solid (0.084 g, 0.278 mmol, 78%). m.p. = 149-151 °C.  $^1H$  NMR ( $CDCl_3$ , 400.09 MHz):  $\delta$  1.46 (s, 18H), 3.28 (d,  $J$  = 3.1 Hz, 2H), 5.32 (t,  $J$  = 3.1 Hz, 1H), 7.09 (m, 2H), 7.21-7.27 (m overlapping solvent, 3H).  $^{13}C$  NMR ( $CDCl_3$ , 100.60 MHz):  $\delta$  27.7, 42.0, 56.5, 67.7, 127.7, 128.9, 129.7, 133.0, 159.5. IR (KBr): 2981.6, 2965.9, 1716.3, 1396.2, 1371.2, 1361.6, 1207.6, 700.7, 632.6  $cm^{-1}$ . HRMS (CI):  $[M+H]^+$  calcd. for  $C_{18}H_{27}N_2O_2$ : 303.2073; Found: 303.2076. Anal. calcd. for  $C_{18}H_{26}N_2O_2$ : C, 71.49; H, 8.67; N, 9.26; Found: C, 71.48; H, 8.69; N, 9.15.

**Synthesis of 8.** An 8 mL vial was charged with **2a** (0.075 g, 0.36 mmol), benzene (1 mL), 4-methyl anisole (0.218 g, 1.78 mmol, 5 equiv) and a stir bar. The resultant mixture was stirred at 80 °C for 24 h after which the reaction mixture was cooled and the residual solvent was removed under reduced pressure. Subsequent washing of the residue with a minimal quantity of pentane followed by drying under reduced pressure afforded **8** as a white solid (0.094 g, 0.283 mmol, 79%). m.p. = 143-145 °C.  $^1H$  NMR ( $CDCl_3$ , 400.09 MHz):  $\delta$  1.46 (s, 18H), 3.21 (d,  $J$  = 2.7 Hz, 2H), 3.72 (s, 3H), 5.28 (t,  $J$  = 3.1 Hz, 1H), 6.78 (d,  $J$  = 8.6 Hz, 2H), 6.99 (d,  $J$  = 8.6 Hz, 2H).  $^{13}C$

NMR (CDCl<sub>3</sub>, 100.60 MHz):  $\delta$  27.7, 40.9, 55.1, 56.5, 67.7, 114.2, 124.5, 130.9, 158.9, 159.6. IR (KBr): 2981.5, 2912.6, 1717.0, 1513.8, 1407.6, 1366.0, 1244.4, 1217.6, 1032.2, 802.6, 564.7 cm<sup>-1</sup>. <sup>1</sup>H NMR (CDCl<sub>3</sub>): [M+H]<sup>+</sup> calcd. for C<sub>19</sub>H<sub>29</sub>N<sub>2</sub>O<sub>3</sub>: 333.2178; Found: 333.2183. Anal. calcd. for C<sub>19</sub>H<sub>28</sub>N<sub>2</sub>O<sub>3</sub>: C, 68.65; H, 8.49; N, 8.43; Found: C, 68.33; H, 8.55; N, 8.39.

**Synthesis of 9.** An 8 mL vial was charged with **2a** (0.075 g, 0.36 mmol), benzene (1 mL), 4-chlorotoluene (0.226 g, 1.78 mmol, 5 equiv) and a stir bar. The resultant mixture was stirred at 80 °C for 48 h after which the reaction mixture was cooled and the residual solvent was removed under reduced pressure. Subsequent washing of the residue with a minimal quantity of pentane followed by drying under reduced pressure afforded **9** as a white solid (0.091 g, 0.270 mmol, 76%). m.p. = 183-185 °C (decomp.) <sup>1</sup>H NMR (CDCl<sub>3</sub>, 400.09 MHz):  $\delta$  1.47 (s, 12H), 3.25 (d,  $J$  = 3.1 Hz, 2H), 5.31 (t,  $J$  = 3.1 Hz, 1H), 7.02 (d,  $J$  = 8.6 Hz, 2H), 7.24 (d overlapping solvent,  $J$  = 8.6 Hz, 2H). <sup>13</sup>C NMR (CDCl<sub>3</sub>, 100.60 MHz):  $\delta$  27.7, 41.1, 56.7, 67.3, 129.0, 131.1, 131.3, 133.7, 159.5. IR (KBr): 2968.8, 2934.6, 1713.9, 1493.3, 1403.3, 1215.8, 1090.3, 809.4, 766.5, 603.7 cm<sup>-1</sup>. HRMS (CI): [M+H]<sup>+</sup> calcd. for C<sub>18</sub>H<sub>26</sub>N<sub>2</sub>O<sub>2</sub><sup>35</sup>Cl: 337.1683; Found: 337.1687. Anal. calcd. for C<sub>18</sub>H<sub>25</sub>ClN<sub>2</sub>O<sub>2</sub>: C, 64.18; H, 7.48; N, 8.32; Found: C, 64.08; H, 7.43; N, 8.39.

**Synthesis of 10.** An 8 mL vial was charged with **2a** (0.075 g, 0.36 mmol), benzene (0.3 mL), tetrahydrofuran (0.257 g, 3.6 mmol, 10 equiv) and a stir bar. The resultant mixture was stirred at 80 °C for 60 h after which the reaction mixture was cooled and the residual solvent was removed under reduced pressure. Subsequent washing of the residue with a minimal quantity of pentane followed by drying under reduced pressure afforded **10** as a white solid (0.079 g, 0.280 mmol, 78%). m.p. = 110-112 °C (decomp.) <sup>1</sup>H NMR (CDCl<sub>3</sub>, 400.09 MHz):  $\delta$  1.29-1.38 (m, 1H), 1.45 (s, 9H), 1.46 (s, 9H), 1.57-1.66 (m, 1H), 1.76-1.90 (m, 2H), 3.72 (q,  $J$  = 7.8 Hz, 1H), 3.99 (m, 1H), 4.20 (m, 1H), 5.25 (d,  $J$  = 2.0 Hz, 1H). <sup>13</sup>C NMR (CDCl<sub>3</sub>, 100.60 MHz):  $\delta$  22.9, 23.9, 27.4, 27.7, 56.0, 57.2, 68.0, 68.6, 82.0, 159.0, 160.6. IR (KBr): 2980.1, 2877.9, 1725.5, 1705.9, 1402.0, 1204.3, 1076.2 cm<sup>-1</sup>. HRMS (CI): [M+H]<sup>+</sup> calcd. for C<sub>15</sub>H<sub>27</sub>N<sub>2</sub>O<sub>3</sub>: 283.2022; Found: 283.2029. Anal. calcd. for C<sub>15</sub>H<sub>26</sub>N<sub>2</sub>O<sub>3</sub>: C, 63.80; H, 9.28; N, 9.92; Found: C, 63.86; H, 9.60; N, 10.31.

**X-Ray Crystallography.** Colorless, single crystals of **1a** were obtained by the slow diffusion of pentane into a concentrated benzene solution; this compound crystallized in the monoclinic *P*2<sub>1</sub>/*c* space group. Colorless, single crystals of **1b** were obtained by the slow diffusion of pentane into a concentrated chloroform solution; this compound crystallized in the monoclinic *P*2<sub>1</sub>/*c* space group. Red-orange single crystals of **2a** were grown by cooling a concentrated pentane solution to -20 °C; this compound crystallized in the monoclinic *P*2<sub>1</sub>/*n* space group. Colorless, single crystals of **3** were obtained by the slow diffusion of pentane into a concentrated chloroform solution; this compound crystallized with two molecules of **3** in the asymmetric cell in the orthorhombic *P*2<sub>1</sub>2<sub>1</sub>2<sub>1</sub> space group. Colorless single crystals of **4** were obtained by the slow diffusion of pentane into a concentrated benzene solution; this compound crystallized in the monoclinic *P*2<sub>1</sub> space group. Colorless, single crystals of **5** were obtained by the slow diffusion of pentane into a saturated benzene solution; this compound crystallized with two molecules of **5** in the asymmetric cell in the monoclinic *P*2<sub>1</sub>/*c* space group. Colorless, single crystals of **7** were obtained by the slow diffusion of pentane into a benzene solution; two molecules of **7** co-crystallized with a solvent benzene molecule in the monoclinic *P*2<sub>1</sub>/*c* space group. Crystallographic measurements were carried out on a Rigaku Mini CCD, Enraf-Nonius Kappa

CCD, or Rigaku AFC-12 with Saturn 724+ CCD area detector diffractometer using graphite-monochromated Mo-K $\alpha$  radiation ( $\lambda = 0.71073$  Å) at 120 K or 150 K using an Oxford Cryostream low temperature device. A sample of suitable size and quality was selected and mounted onto a nylon loop. Data reductions were performed using DENZO-SMN.<sup>S5</sup> The structures were solved by direct methods which successfully located most of the non-hydrogen atoms. Subsequent refinements on  $F^2$  using the SHELXTL/PC package (version 5.1)<sup>S6</sup> allowed the location of the remaining non-hydrogen atoms. Key details of the crystal and structure refinement data are summarized in Table S1-S2. Further crystallographic details may be found in the respective CIFs which were deposited at the Cambridge Crystallographic Data Centre, Cambridge, UK. The CCDC reference numbers for **1a**, **1b**, **2a**, **3**, **4**, **5**, and **7** were assigned as 983770, 983771, 983772, 983773, 983774, 983775, and 983776, respectively.

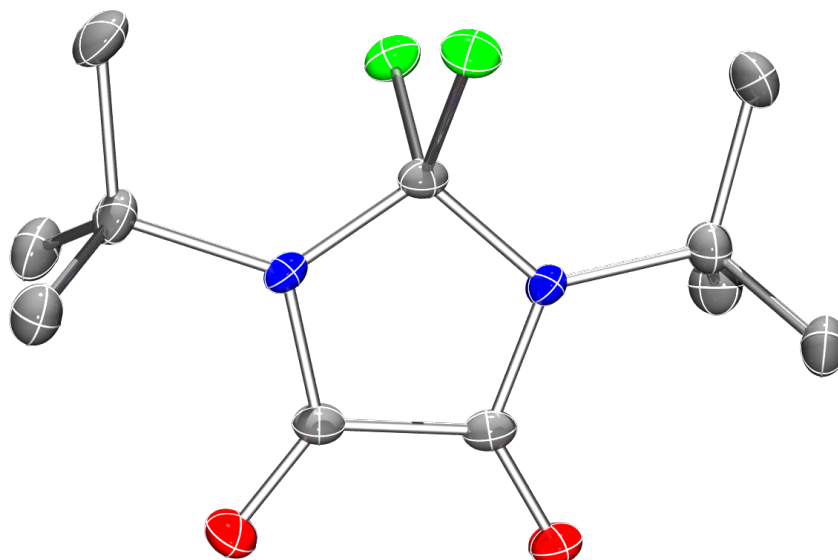

**Figure S1.** ORTEP diagram of **1a** with thermal ellipsoids drawn at 50% probability and H-atoms omitted for clarity.

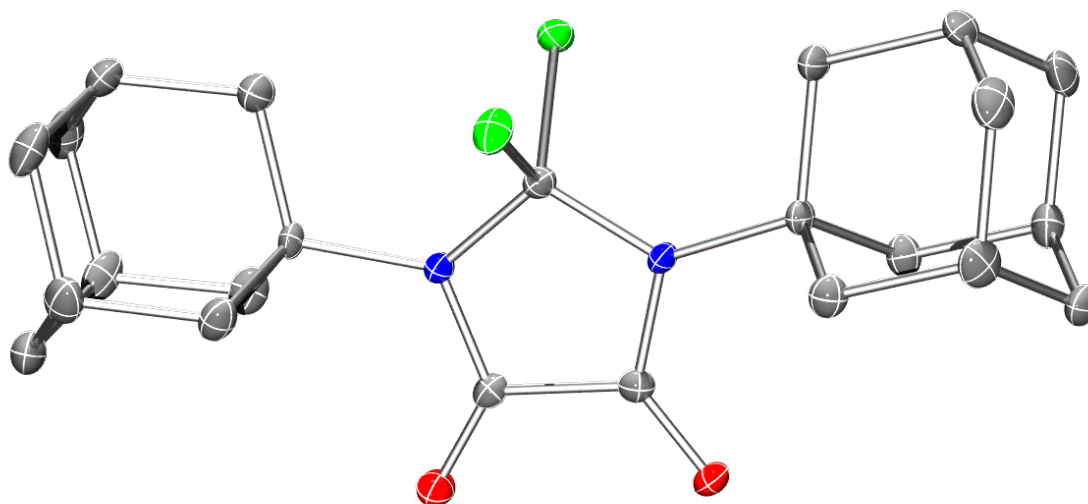

**Figure S2.** ORTEP diagram of **1b** with thermal ellipsoids drawn at 50% probability and H-atoms omitted for clarity.

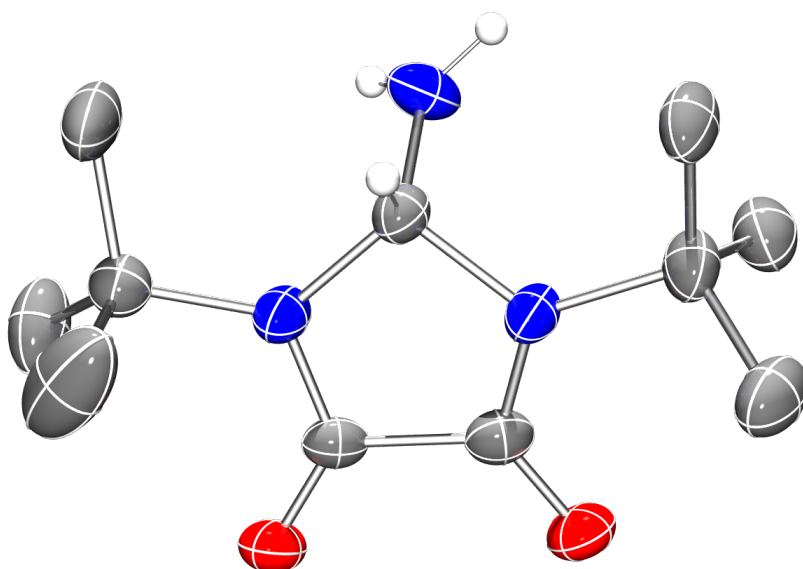

**Figure S3.** ORTEP diagram of **3** with thermal ellipsoids drawn at 50% probability and H-atoms, except at the nitrogens and carbenoid carbon, and a second molecule of **3** omitted for clarity.

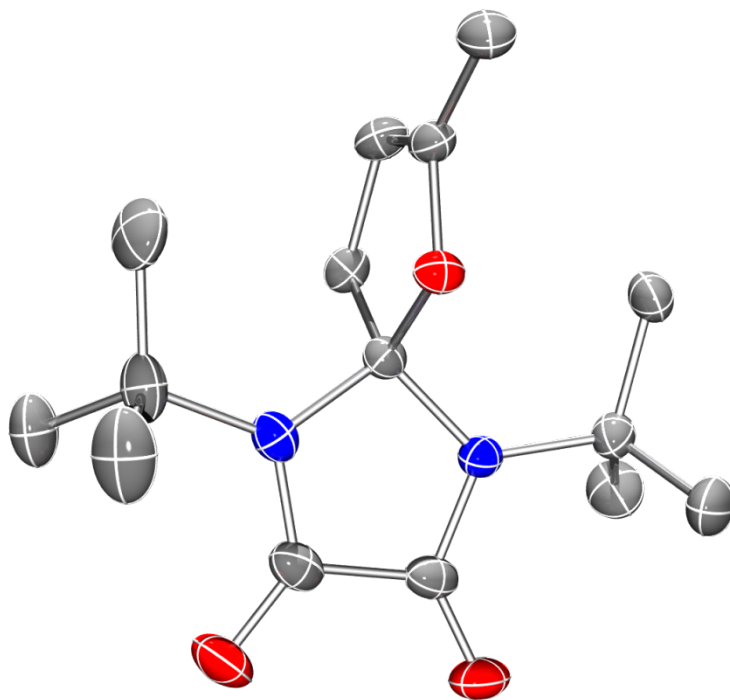

**Figure S4.** ORTEP diagram of **4** with thermal ellipsoids drawn at 50% probability and H-atoms omitted for clarity.



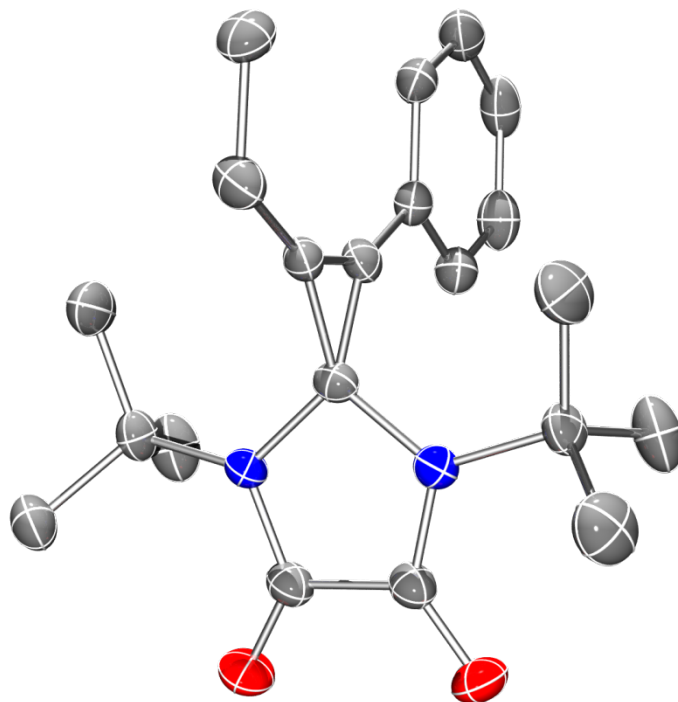

**Figure S5.** ORTEP diagram of **5** with thermal ellipsoids drawn at 50% probability and H-atoms and a second molecule of **5** omitted for clarity.

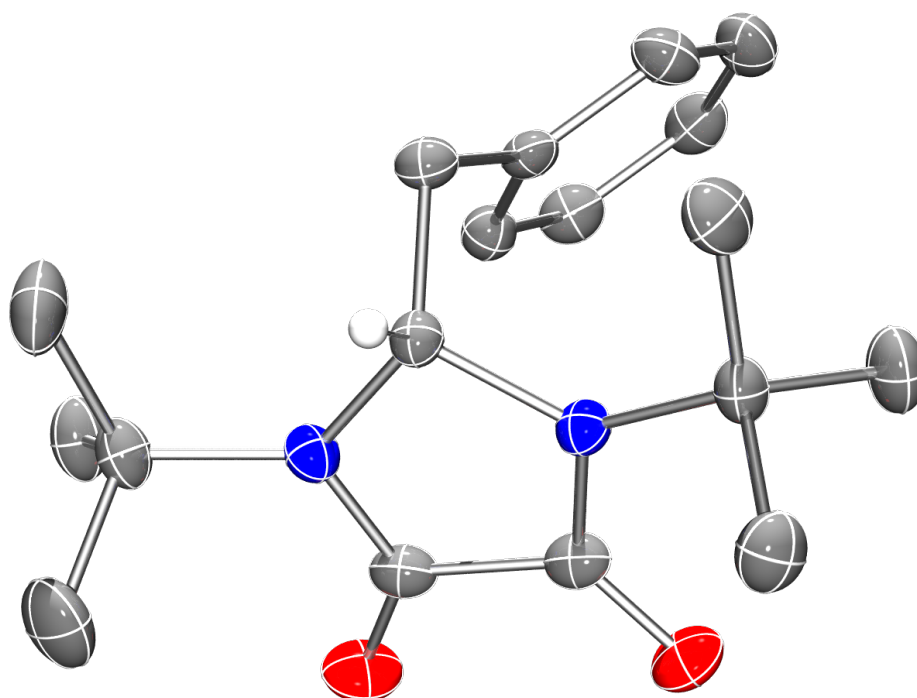

**Figure S6.** ORTEP diagram of **7** with thermal ellipsoids drawn at 50% probability and H-atoms, except at the carbenoid carbon, a second molecule of **7**, and a solvent benzene molecule omitted for clarity.

**Table S1.** Summary of crystal data, data collection, and structure refinement details for **1a**, **1b**, **2a**, and **3**.

|                                                    | <b>1a</b>                                                                     | <b>1b</b>                                                                     | <b>2a</b>                                                     | <b>3</b>                                                      |
|----------------------------------------------------|-------------------------------------------------------------------------------|-------------------------------------------------------------------------------|---------------------------------------------------------------|---------------------------------------------------------------|
| Formula                                            | C <sub>11</sub> H <sub>18</sub> Cl <sub>2</sub> N <sub>2</sub> O <sub>2</sub> | C <sub>23</sub> H <sub>30</sub> Cl <sub>2</sub> N <sub>2</sub> O <sub>2</sub> | C <sub>11</sub> H <sub>18</sub> N <sub>2</sub> O <sub>2</sub> | C <sub>11</sub> H <sub>21</sub> N <sub>3</sub> O <sub>2</sub> |
| $M_r$                                              | 281.17                                                                        | 437.39                                                                        | 210.27                                                        | 227.31                                                        |
| crystal size (mm <sup>3</sup> )                    | 0.14 × 0.09 × 0.08                                                            | 0.29 × 0.26 × 0.22                                                            | 0.18 × 0.13 × 0.07                                            | 0.12 × 0.07 × 0.04                                            |
| crystal system                                     | Monoclinic                                                                    | Monoclinic                                                                    | Monoclinic                                                    | Orthorhombic                                                  |
| space group                                        | $P2_1/c$                                                                      | $P2_1/c$                                                                      | $P2_1/n$                                                      | $P2_12_12_1$                                                  |
| $a$ (Å)                                            | 8.3148(19)                                                                    | 14.331(4)                                                                     | 13.3310(12)                                                   | 9.102(3)                                                      |
| $b$ (Å)                                            | 14.215(3)                                                                     | 11.335(4)                                                                     | 5.9383(5)                                                     | 12.188(4)                                                     |
| $c$ (Å)                                            | 11.639(3)                                                                     | 12.768(4)                                                                     | 15.6507(14)                                                   | 23.505(8)                                                     |
| $\alpha$ (°)                                       | 90                                                                            | 90                                                                            | 90                                                            | 90                                                            |
| $\beta$ (°)                                        | 99.688(5)                                                                     | 103.063(6)                                                                    | 105.521(3)                                                    | 90                                                            |
| $\gamma$ (°)                                       | 90                                                                            | 90                                                                            | 90                                                            | 90                                                            |
| $V$ (Å <sup>3</sup> )                              | 1356.1(5)                                                                     | 2020.3(11)                                                                    | 1193.78(18)                                                   | 2607.5(16)                                                    |
| $Z$                                                | 4                                                                             | 4                                                                             | 4                                                             | 8                                                             |
| $\rho_{\text{calc}}$ (g cm <sup>-3</sup> )         | 1.377                                                                         | 1.438                                                                         | 1.170                                                         | 1.158                                                         |
| $\mu$ (mm <sup>-1</sup> )                          | 0.471                                                                         | 0.345                                                                         | 0.081                                                         | 0.081                                                         |
| $F(000)$                                           | 592                                                                           | 928                                                                           | 456                                                           | 992                                                           |
| $T$ (K)                                            | 120(2)                                                                        | 120(2)                                                                        | 120(2)                                                        | 150(2)                                                        |
| scan mode                                          | $\omega$                                                                      | $\omega$                                                                      | $\omega$                                                      | $\omega$                                                      |
| $hkl$ range                                        | -9 → 9<br>-16 → 16<br>-13 → 13                                                | -16 → 17<br>-13 → 13<br>-15 → 15                                              | -15 → 15<br>-7 → 6<br>-18 → 18                                | -10 → 10<br>-14 → 14<br>-27 → 27                              |
| measd reflns                                       | 19296                                                                         | 13343                                                                         | 11792                                                         | 34428                                                         |
| unique reflns [ $R_{\text{int}}$ ]                 | 2373[0.0989]                                                                  | 3550 [0.0356]                                                                 | 2089 [0.0416]                                                 | 4584[0.0919]                                                  |
| refinement reflns                                  | 2373                                                                          | 3550                                                                          | 2089                                                          | 4584                                                          |
| refined parameters                                 | 160                                                                           | 262                                                                           | 142                                                           | 301                                                           |
| GOF on $F^2$                                       | 1.006                                                                         | 1.006                                                                         | 1.006                                                         | 1.006                                                         |
| $R1^a$ (all data)                                  | 0.0449 (0.0598)                                                               | 0.0366 (0.0937)                                                               | 0.0452 (0.0546)                                               | 0.0851 (0.0897)                                               |
| wR2 (all data)                                     | 0.0982 (0.1055)                                                               | 0.0393 (0.0958)                                                               | 0.1137 (0.1211)                                               | 0.1985 (0.2025)                                               |
| $\rho_{\text{fin}}$ (max/min) (e Å <sup>-3</sup> ) | 0.307<br>-0.261                                                               | 0.506<br>-0.299                                                               | 0.305<br>-0.187                                               | 0.337<br>-0.336                                               |

$$^a R1 = \sum ||F_o| - |F_c|| / \sum |F_o|. \quad ^b wR2 = \{[\sum w(F_o^2 - F_c^2)^2] / [\sum w(F_o^2)^2]\}^{1/2}.$$

**Table S2.** Summary of crystal data, data collection, and structure refinement details for **4**, **5**, and **7**.

|                                                        | <b>4</b>                                                      | <b>5</b>                                                      | <b>7·C<sub>6</sub>H<sub>6</sub></b>                           |
|--------------------------------------------------------|---------------------------------------------------------------|---------------------------------------------------------------|---------------------------------------------------------------|
| Formula                                                | C <sub>15</sub> H <sub>24</sub> N <sub>2</sub> O <sub>3</sub> | C <sub>21</sub> H <sub>28</sub> N <sub>2</sub> O <sub>2</sub> | C <sub>42</sub> H <sub>58</sub> N <sub>4</sub> O <sub>4</sub> |
| <i>M<sub>r</sub></i>                                   | 280.36                                                        | 340.45                                                        | 682.92                                                        |
| crystal size (mm <sup>3</sup> )                        | 0.26 × 0.24 × 0.07                                            | 0.14 × 0.09 × 0.05                                            | 0.31 × 0.26 × 0.23                                            |
| crystal system                                         | Monoclinic                                                    | Monoclinic                                                    | Monoclinic                                                    |
| space group                                            | <i>P</i> 2 <sub>1</sub>                                       | <i>P</i> 2 <sub>1</sub> /c                                    | <i>P</i> 2 <sub>1</sub> /c                                    |
| <i>a</i> (Å)                                           | 6.1949(2)                                                     | 9.1753(6)                                                     | 17.9469(10)                                                   |
| <i>b</i> (Å)                                           | 13.0960(3)                                                    | 22.7039(14)                                                   | 17.5630(8)                                                    |
| <i>c</i> (Å)                                           | 9.5555(3)                                                     | 18.5417(13)                                                   | 12.2414(7)                                                    |
| <i>α</i> (°)                                           | 90                                                            | 90                                                            | 90                                                            |
| <i>β</i> (°)                                           | 93.800(2)                                                     | 97.125(5)                                                     | 90.152(2)                                                     |
| <i>γ</i> (°)                                           | 90                                                            | 90                                                            | 90                                                            |
| <i>V</i> (Å <sup>3</sup> )                             | 773.52(4)                                                     | 3832.7(4)                                                     | 3858.5(4)                                                     |
| <i>Z</i>                                               | 2                                                             | 8                                                             | 4                                                             |
| <i>ρ</i> <sub>calc</sub> (g cm <sup>-3</sup> )         | 1.204                                                         | 1.180                                                         | 1.176                                                         |
| <i>μ</i> (mm <sup>-1</sup> )                           | 0.084                                                         | 0.076                                                         | 0.075                                                         |
| <i>F</i> (000)                                         | 304                                                           | 1472                                                          | 1480                                                          |
| <i>T</i> (K)                                           | 150(2)                                                        | 120(2)                                                        | 120(2)                                                        |
| scan mode                                              | <i>ω</i>                                                      | <i>ω</i>                                                      | <i>ω</i>                                                      |
| <i>hkl</i> range                                       | -7 → 7<br>-15 → 15<br>-11 → 11                                | -10 → 10<br>-27 → 27<br>-22 → 22                              | -21 → 19<br>-14 → 20<br>-13 → 14                              |
| measd reflns                                           | 20735                                                         | 144570                                                        | 18906                                                         |
| unique reflns [ <i>R</i> <sub>int</sub> ]              | 2727 [0.0346]                                                 | 6729 [0.2417]                                                 | 6694[0.0313]                                                  |
| refinement reflns                                      | 2727                                                          | 6729                                                          | 6694                                                          |
| refined parameters                                     | 188                                                           | 465                                                           | 463                                                           |
| GOF on <i>F</i> <sup>2</sup>                           | 1.006                                                         | 1.006                                                         | 1.006                                                         |
| <i>R</i> 1 <sup>a</sup> (all data)                     | 0.0285 (0.0303)                                               | 0.0594 (0.1175)                                               | 0.0422 (0.0986)                                               |
| w <i>R</i> 2 (all data)                                | 0.0781 (0.0798)                                               | 0.1462 (0.1648)                                               | 0.0590 (0.1113)                                               |
| <i>ρ</i> <sub>fin</sub> (max/min) (e Å <sup>-3</sup> ) | 0.197<br>-0.217                                               | 0.224<br>-0.335                                               | 0.263<br>-0.256                                               |

<sup>a</sup>  $R1 = \sum ||Fo| - |Fc|| / \sum |Fo|$ . <sup>b</sup>  $wR2 = \{[\sum w(Fo^2 - Fc^2)^2] / [\sum w(Fo^2)^2]\}^{1/2}$ .

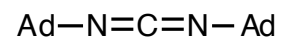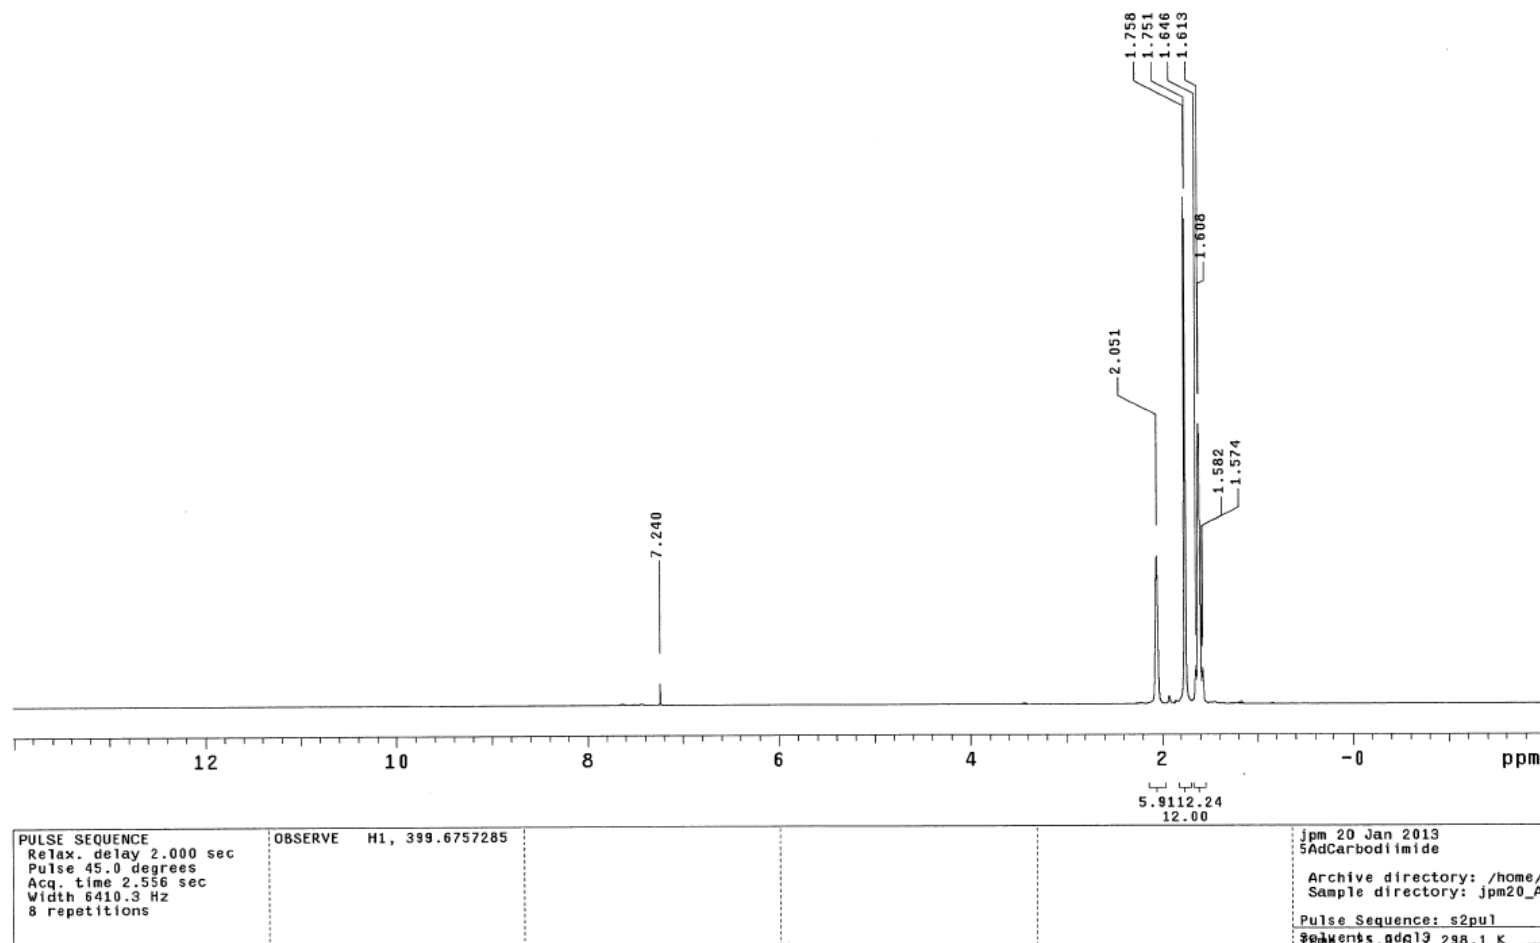

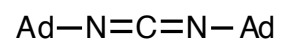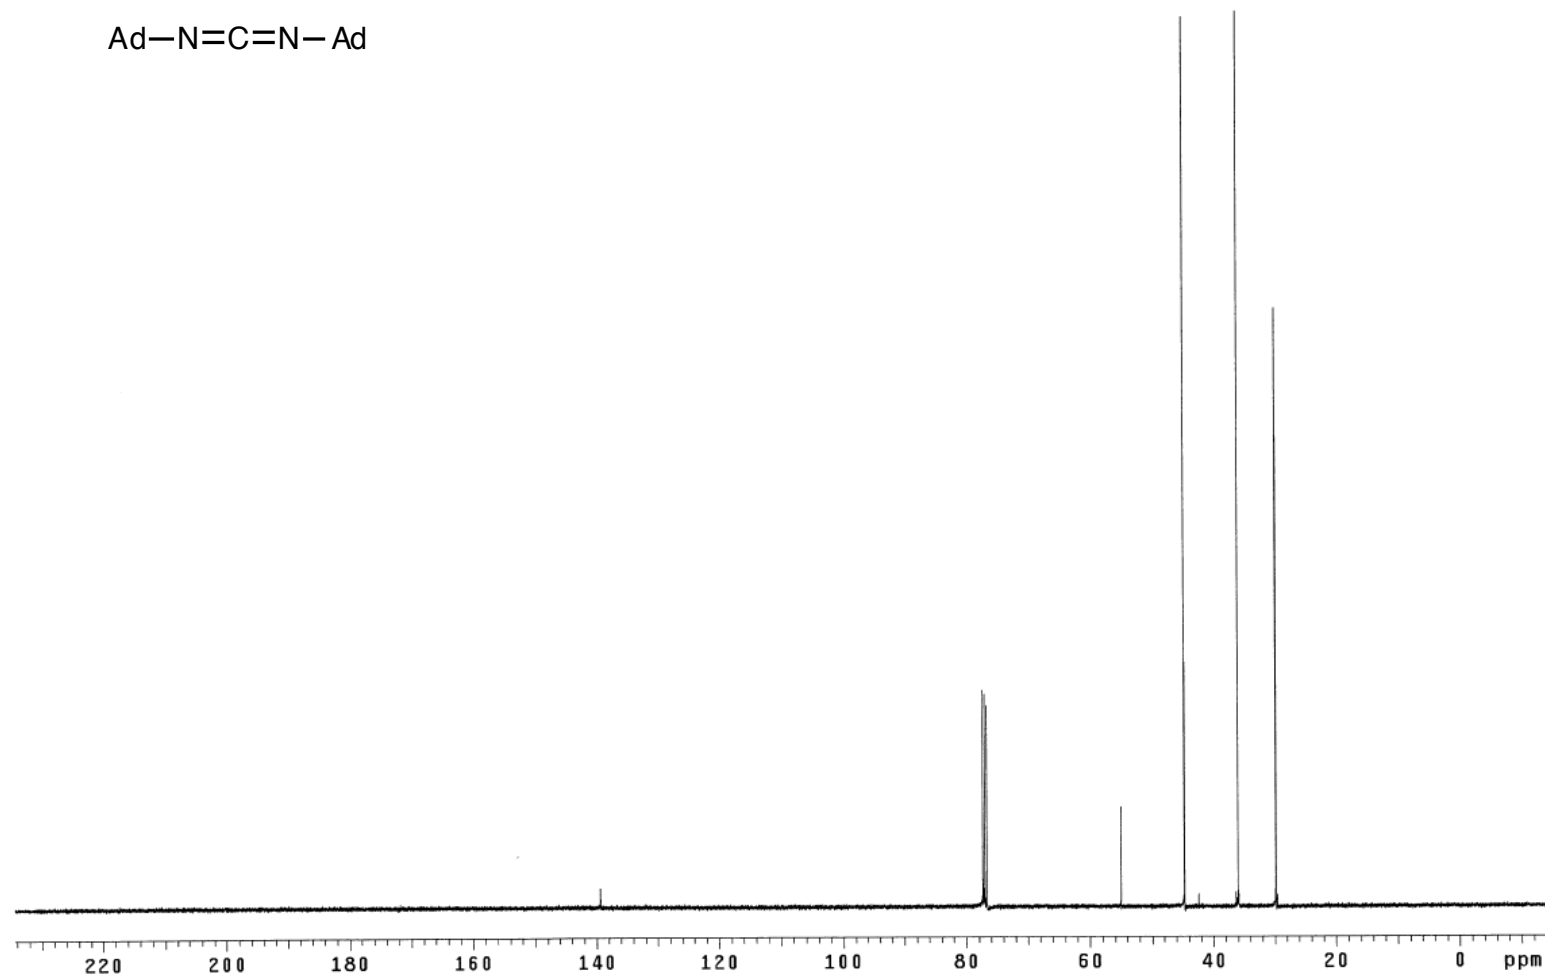

|                                                                                                                              |                          |  |  |  |                                                                                                                                                   |
|------------------------------------------------------------------------------------------------------------------------------|--------------------------|--|--|--|---------------------------------------------------------------------------------------------------------------------------------------------------|
| PULSE SEQUENCE<br>Relax. delay 2.000 sec<br>Pulse 30.0 degrees<br>Acq. time 1.311 sec<br>Width 25000.0 Hz<br>500 repetitions | OBSERVE C13, 100.4985430 |  |  |  | jpm 20 Jan 2014<br>AdCarbodiimide<br>Archive directory: /home/<br>Sample directory: jpm20_A<br>Pulse Sequence: s2pul<br>Parameters: adc13 298.1 K |
|------------------------------------------------------------------------------------------------------------------------------|--------------------------|--|--|--|---------------------------------------------------------------------------------------------------------------------------------------------------|

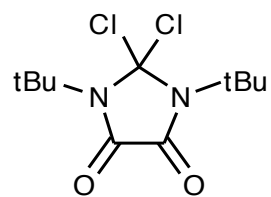

**1a**

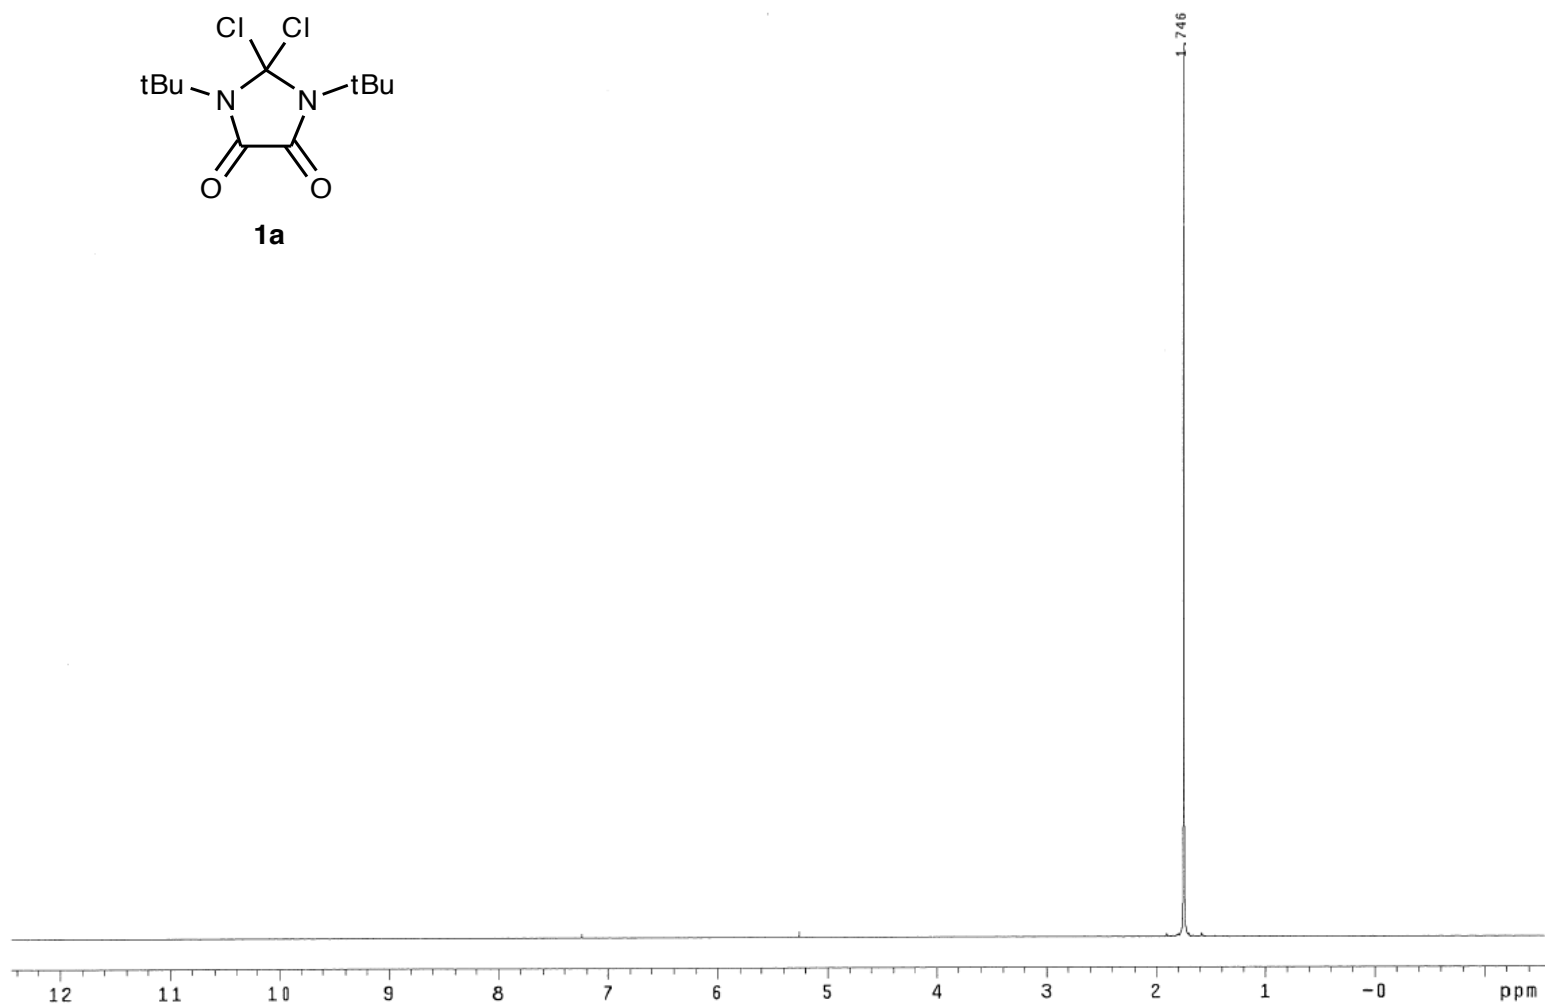

|                                                                                                                                   |                                |                                                                                          |  |  |                                                                                                                       |
|-----------------------------------------------------------------------------------------------------------------------------------|--------------------------------|------------------------------------------------------------------------------------------|--|--|-----------------------------------------------------------------------------------------------------------------------|
| <b>PULSE SEQUENCE</b><br>Relax. delay 2.000 sec<br>Pulse 16.4 degrees<br>Acq. time 2.856 sec<br>Width 5602.2 Hz<br>11 repetitions | <b>OBSERVE</b> H1, 400.2669856 | <b>DATA PROCESSING</b><br>Line broadening 0.1 Hz<br>FT size 32768<br>Total time 1 minute |  |  | jpm 19 Nov 2013<br>StBuDACC12<br>Pulse Sequence: s2pu1<br>Solvent: CDCl3<br>Ambient temperature<br>Mercury-400 "nmr6" |
|-----------------------------------------------------------------------------------------------------------------------------------|--------------------------------|------------------------------------------------------------------------------------------|--|--|-----------------------------------------------------------------------------------------------------------------------|

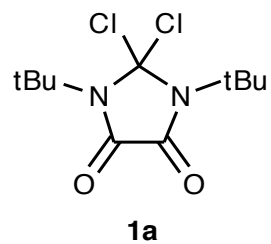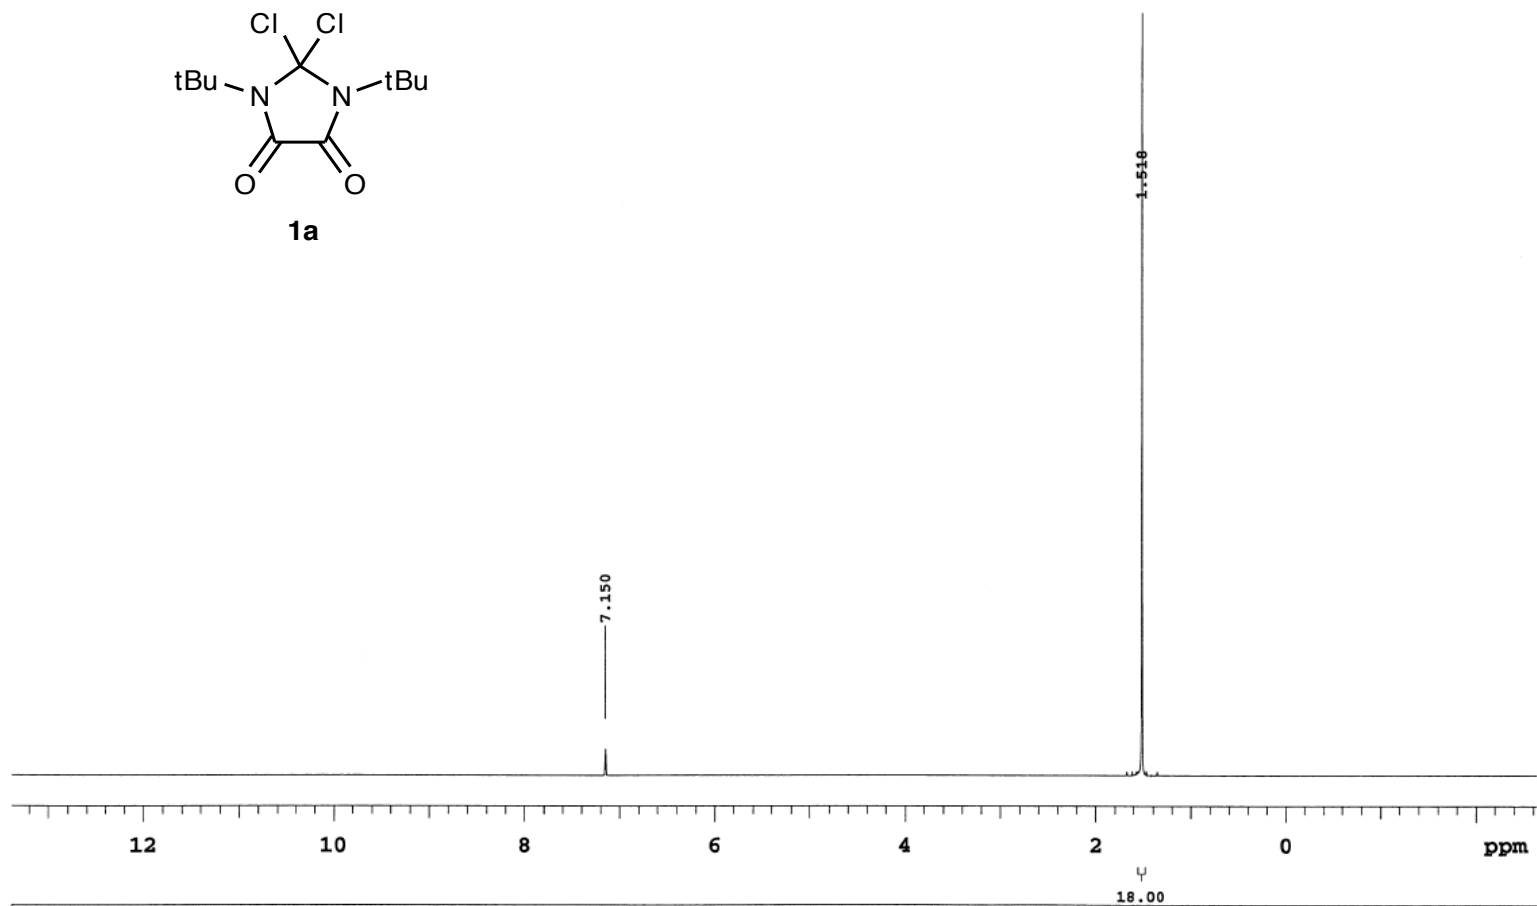

|                                                                                                                                  |                                |                                                                |                                                                                                                      |
|----------------------------------------------------------------------------------------------------------------------------------|--------------------------------|----------------------------------------------------------------|----------------------------------------------------------------------------------------------------------------------|
| <b>PULSE SEQUENCE</b><br>Relax. delay 2.000 sec<br>Pulse 45.0 degrees<br>Acq. time 2.556 sec<br>Width 6410.3 Hz<br>8 repetitions | <b>OBSERVE</b> H1, 400.0864171 | <b>DATA PROCESSING</b><br>FT size 32768<br>Total time 1 minute | jpm 25 Jan 2014<br>5tBuDACC12<br>C6D6<br>Solvent: c6d6<br>Ambient temperature<br>Operator: moerdj<br>File: PROTON_01 |
|                                                                                                                                  |                                |                                                                |                                                                                                                      |

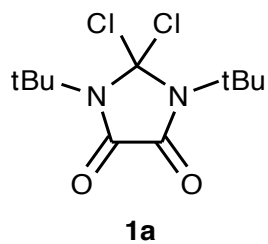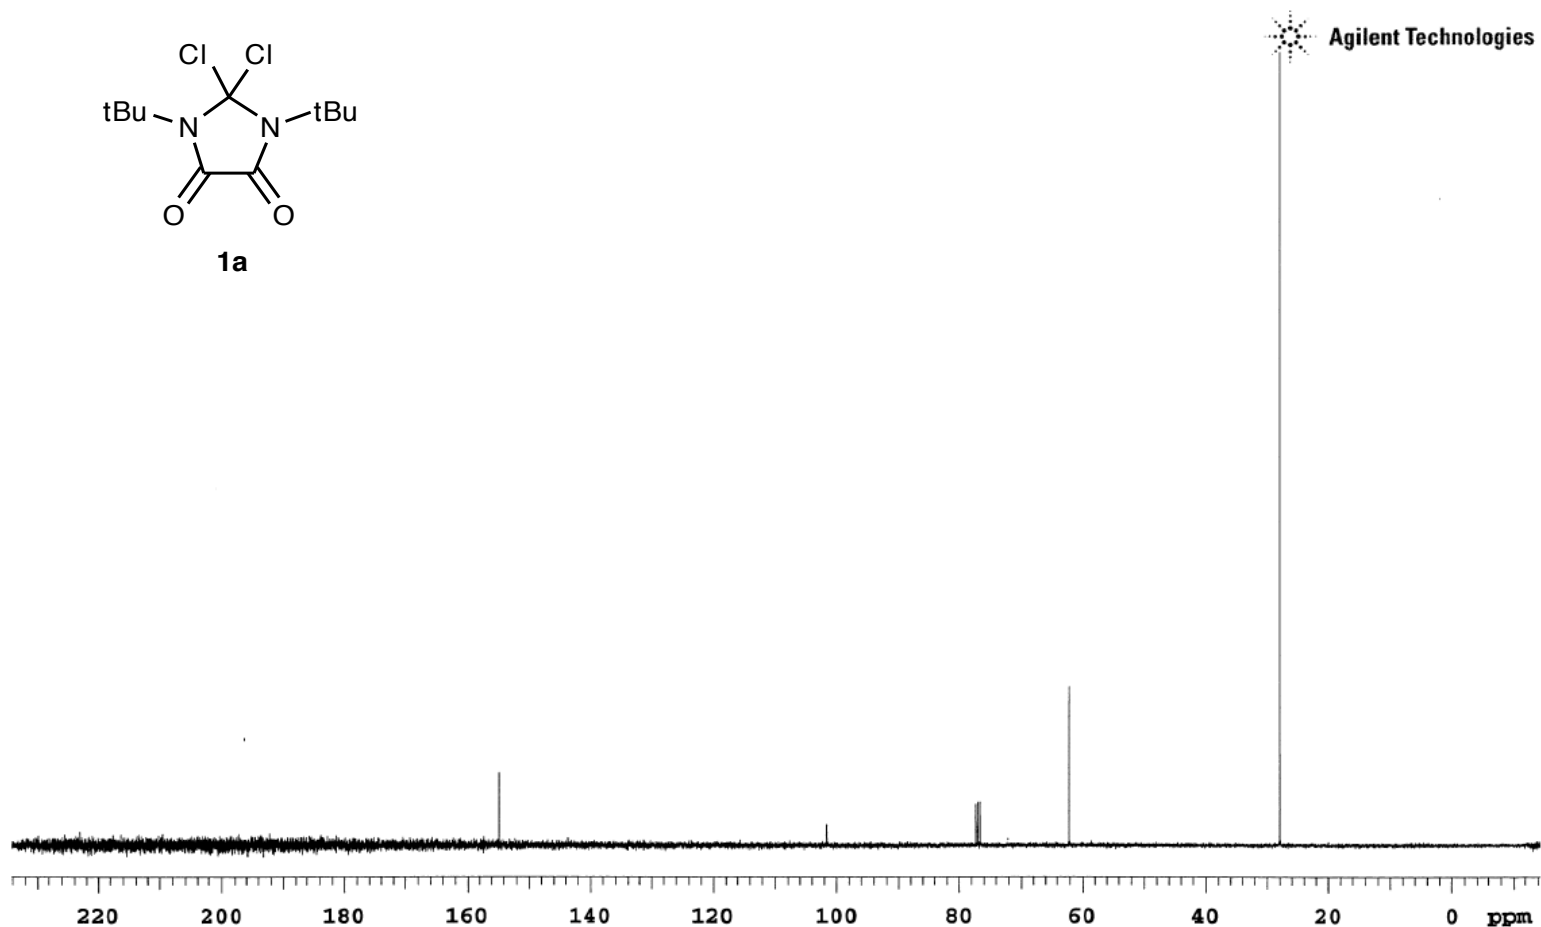

|                                                                                                                                    |                                                                                                                            |                                                                                           |  |                                                                                                                        |
|------------------------------------------------------------------------------------------------------------------------------------|----------------------------------------------------------------------------------------------------------------------------|-------------------------------------------------------------------------------------------|--|------------------------------------------------------------------------------------------------------------------------|
| <b>PULSE SEQUENCE</b><br>Relax. delay 2.000 sec<br>Pulse 30.0 degrees<br>Acq. time 1.311 sec<br>Width 25000.0 Hz<br>32 repetitions | <b>OBSERVE</b> C13, 100.6017503<br><b>DECOUPLE</b> H1, 400.0881319<br>Power 35 dB<br>continuously on<br>WALTZ-16 modulated | <b>DATA PROCESSING</b><br>Line broadening 0.5 Hz<br>FT size 65536<br>Total time 1 minutes |  | jpm 14 Dec 2013<br>5tBuDACC12<br><hr/> Solvent: cdcl3<br>Ambient temperature<br>Operator: moerdj<br>VNMRS-400 "nhb400" |
|------------------------------------------------------------------------------------------------------------------------------------|----------------------------------------------------------------------------------------------------------------------------|-------------------------------------------------------------------------------------------|--|------------------------------------------------------------------------------------------------------------------------|



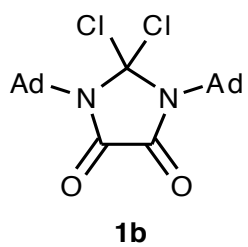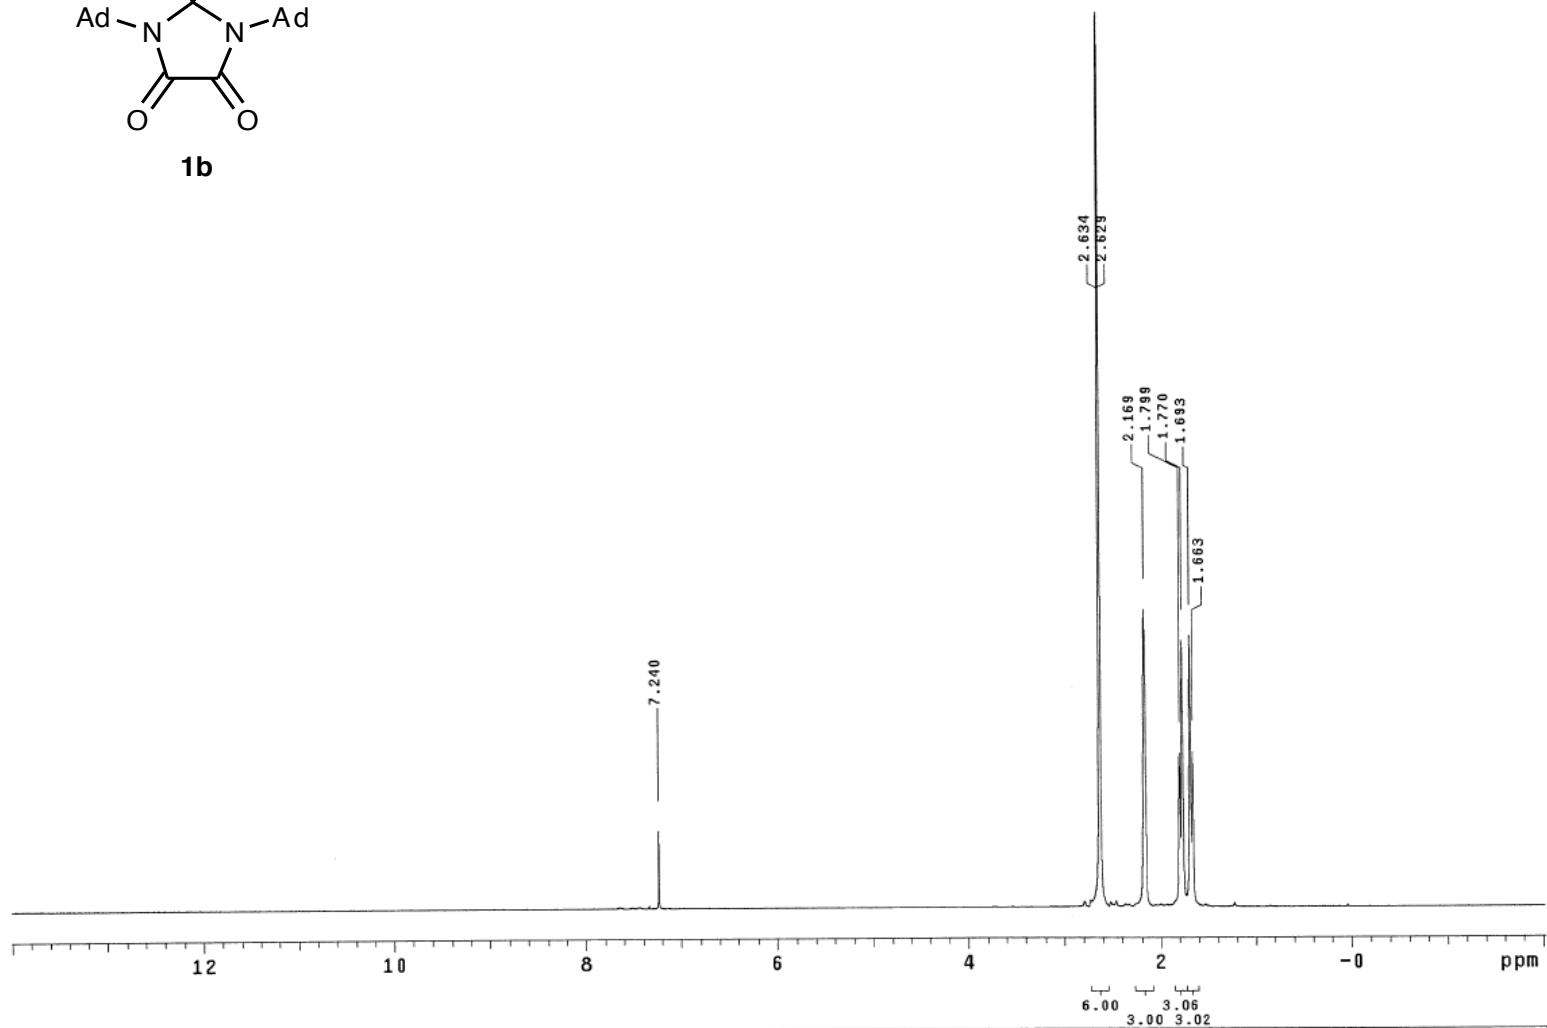

|                                                                                                                                  |                                |  |  |  |                                                                                                                                                |
|----------------------------------------------------------------------------------------------------------------------------------|--------------------------------|--|--|--|------------------------------------------------------------------------------------------------------------------------------------------------|
| <b>PULSE SEQUENCE</b><br>Relax. delay 2.000 sec<br>Pulse 45.0 degrees<br>Acq. time 2.556 sec<br>Width 6410.3 Hz<br>4 repetitions | <b>OBSERVE</b> H1, 399.6757285 |  |  |  | jpm17_5AdDACC12<br>Archive directory: /home/<br>Sample directory: jpm17_5<br>Pulse Sequence: s2pu1<br>Solvent: cdc13<br>Temp. 25.0 C / 298.1 K |
|----------------------------------------------------------------------------------------------------------------------------------|--------------------------------|--|--|--|------------------------------------------------------------------------------------------------------------------------------------------------|

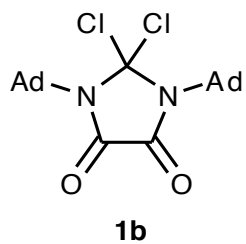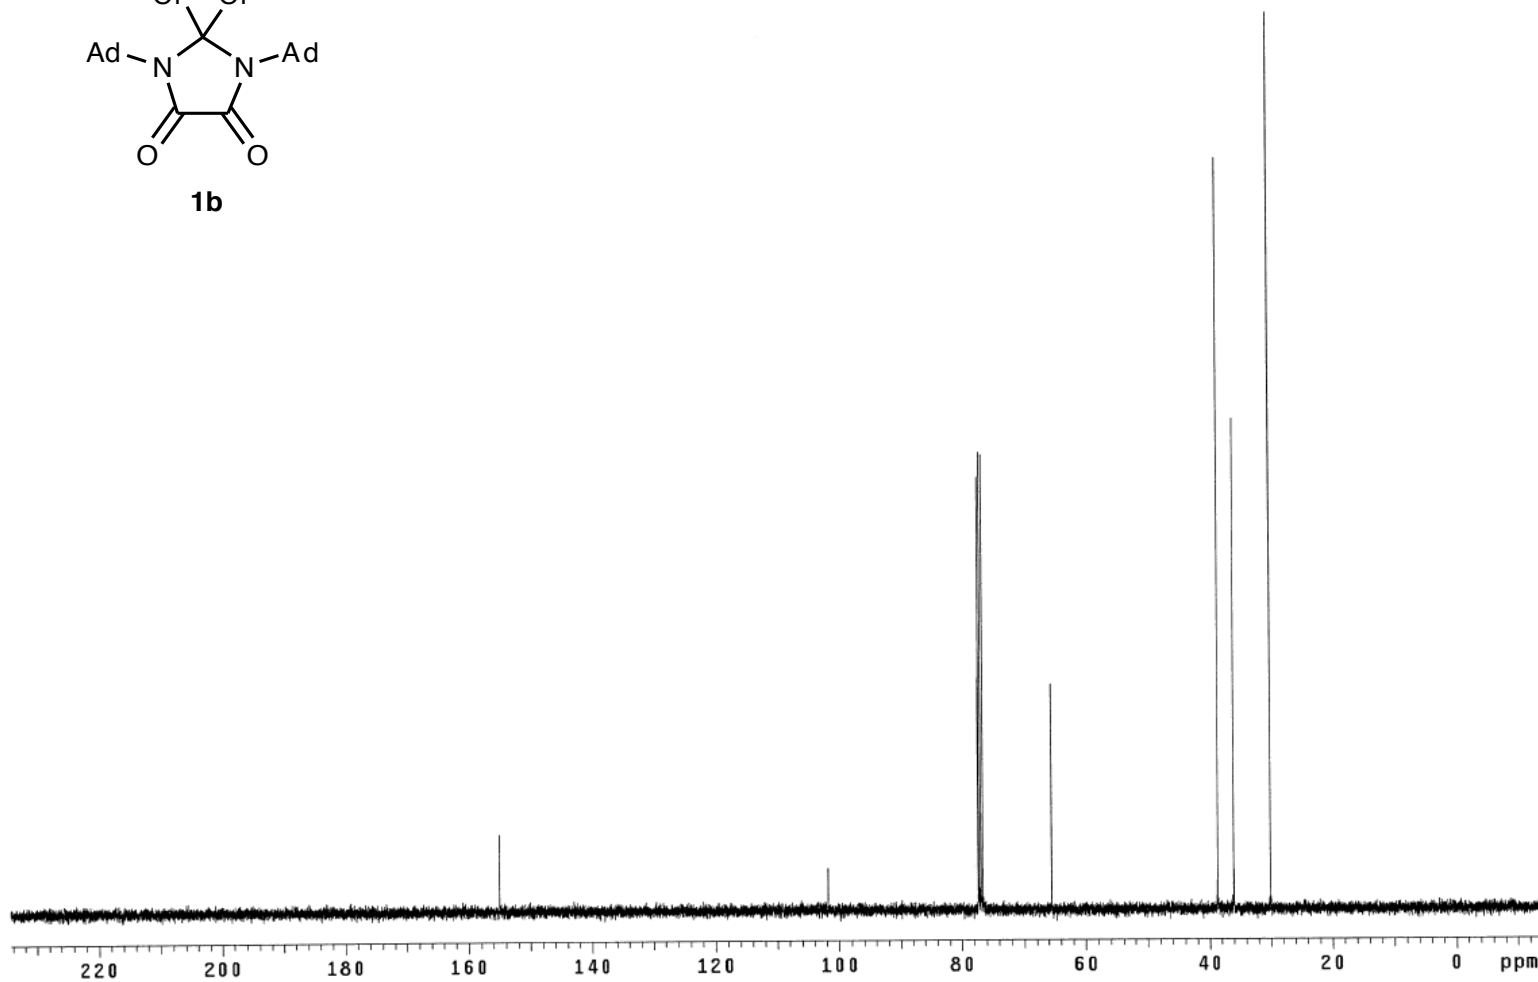

|                                                                                                                                     |                                 |  |  |  |                                                                                                                                                |
|-------------------------------------------------------------------------------------------------------------------------------------|---------------------------------|--|--|--|------------------------------------------------------------------------------------------------------------------------------------------------|
| <b>PULSE SEQUENCE</b><br>Relax. delay 2.000 sec<br>Pulse 30.0 degrees<br>Acq. time 1.311 sec<br>Width 25000.0 Hz<br>500 repetitions | <b>OBSERVE</b> C13, 100.4985408 |  |  |  | jpm17_5AdDACC12<br>Archive directory: /home/<br>Sample directory: jpm17_5<br>Pulse Sequence: s2pu1<br>Solvent: cdcl3<br>Temp. 25.0 C / 298.1 K |
|-------------------------------------------------------------------------------------------------------------------------------------|---------------------------------|--|--|--|------------------------------------------------------------------------------------------------------------------------------------------------|

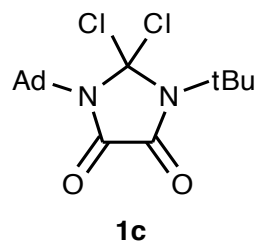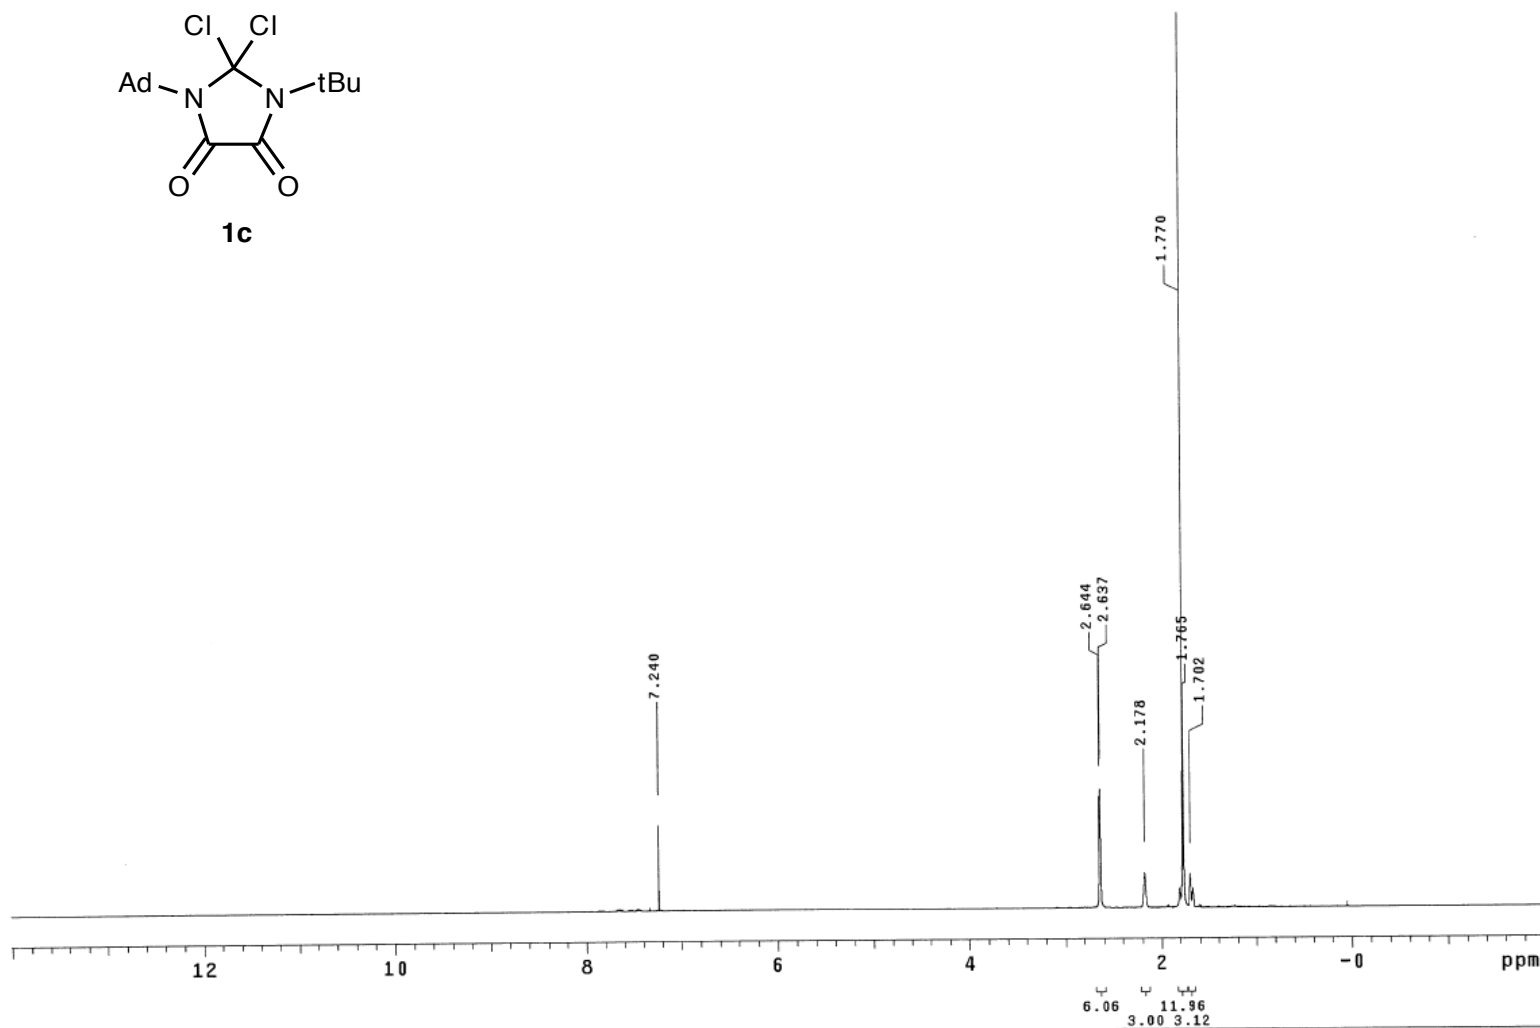

PULSE SEQUENCE  
Relax. delay 2.000 sec  
Pulse 45.0 degrees  
Acq. time 2.556 sec  
Width 6410.3 Hz  
4 repetitions

OBSERVE H1, 399.6757285

jpm17\_5AdtBuDACC12  
Archive directory: /home/  
Sample directory: jpm17\_5  
Pulse Sequence: s2pu1  
Solvent: cdcl3  
Temp. 25.0 C / 298.1 K

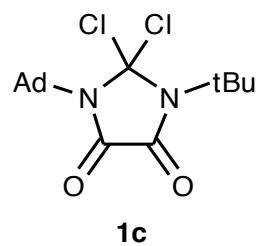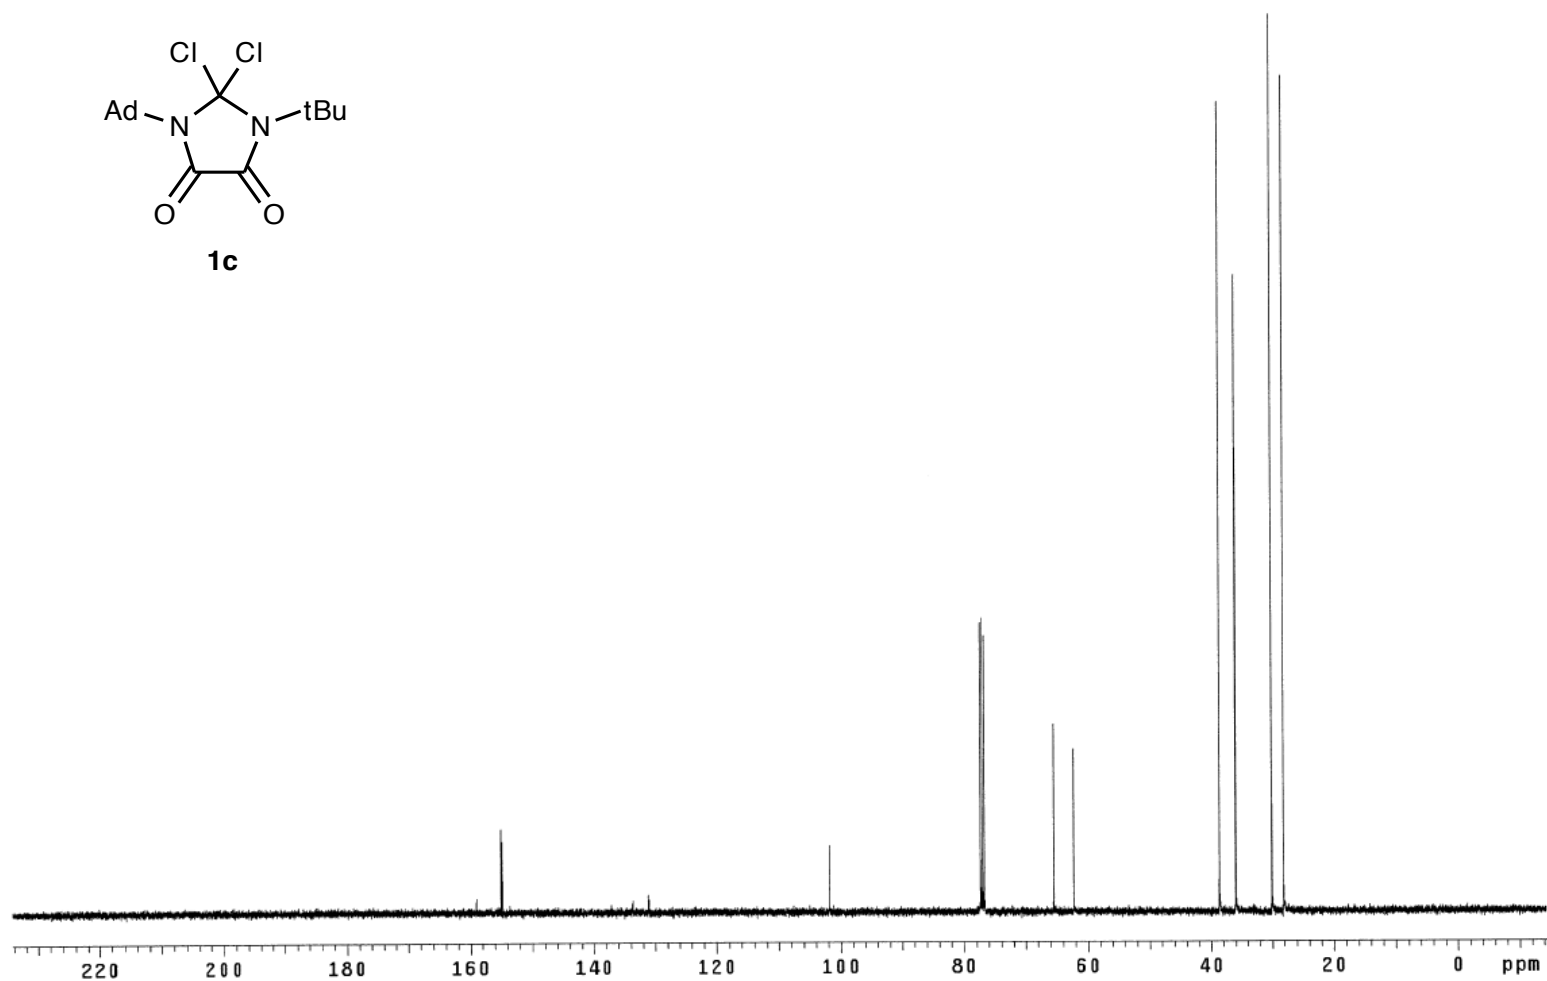

|                                                                                                                                     |                                 |  |  |  |                                                                                                                                            |
|-------------------------------------------------------------------------------------------------------------------------------------|---------------------------------|--|--|--|--------------------------------------------------------------------------------------------------------------------------------------------|
| <b>PULSE SEQUENCE</b><br>Relax. delay 2.000 sec<br>Pulse 30.0 degrees<br>Acq. time 1.311 sec<br>Width 25000.0 Hz<br>500 repetitions | <b>OBSERVE</b> C13, 100.4985430 |  |  |  | jpm 17 Jan 2014<br>5AdtBuDAC<br>Archive directory: /home/<br>Sample directory: jpm17_5<br>Pulse Sequence: s2pu1<br>Segments: 00019 298.1 K |
|-------------------------------------------------------------------------------------------------------------------------------------|---------------------------------|--|--|--|--------------------------------------------------------------------------------------------------------------------------------------------|

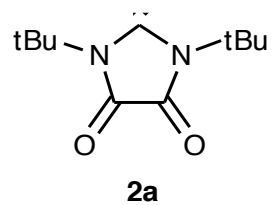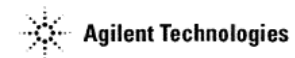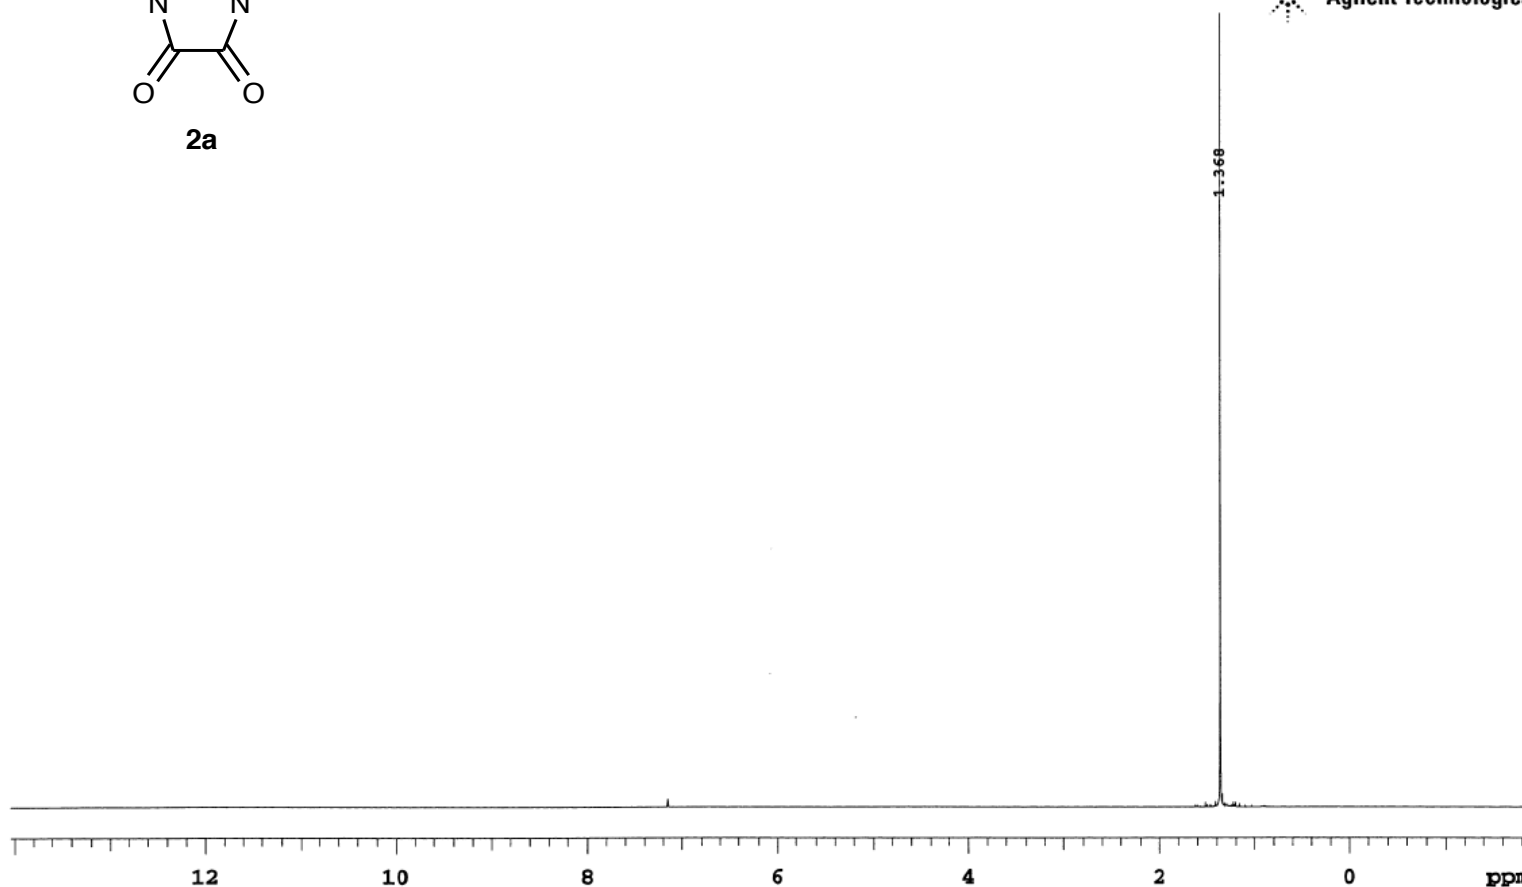

|                                                                                                                                  |                                |                                                                |                                                                                                                                                               |
|----------------------------------------------------------------------------------------------------------------------------------|--------------------------------|----------------------------------------------------------------|---------------------------------------------------------------------------------------------------------------------------------------------------------------|
| <b>PULSE SEQUENCE</b><br>Relax. delay 2.000 sec<br>Pulse 45.0 degrees<br>Acq. time 2.556 sec<br>Width 6410.3 Hz<br>8 repetitions | <b>OBSERVE</b> H1, 400.0861542 | <b>DATA PROCESSING</b><br>FT size 32768<br>Total time 1 minute | <div>18.00 jpm 26 Nov 2013<br/>5tBuDAC</div> <div>Solvent: c6d6<br/>Ambient temperature<br/>Operator: moerdj<br/>File: PROTON_01<br/>VNMRS-400 "nhb400"</div> |
|----------------------------------------------------------------------------------------------------------------------------------|--------------------------------|----------------------------------------------------------------|---------------------------------------------------------------------------------------------------------------------------------------------------------------|

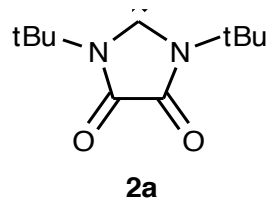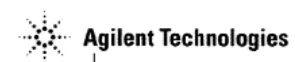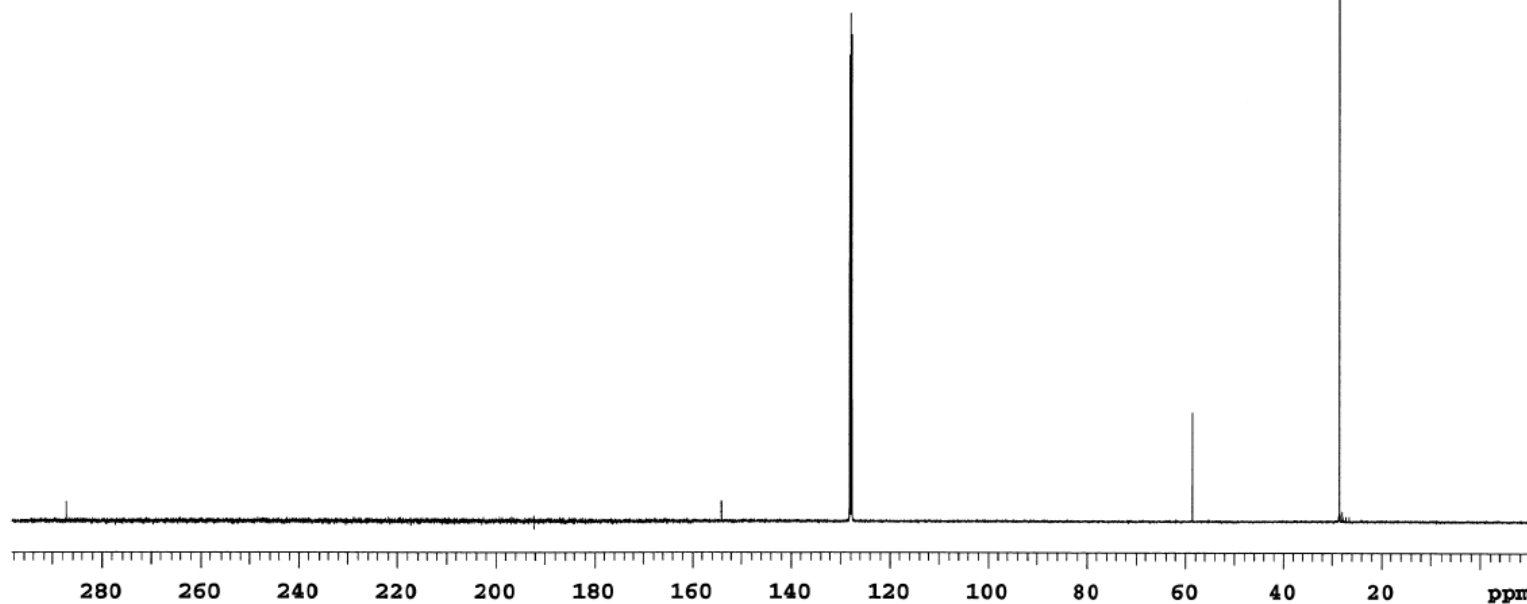

|                                                                                                                                     |                                                                                                                            |                                                                                            |                                                                                                                                    |
|-------------------------------------------------------------------------------------------------------------------------------------|----------------------------------------------------------------------------------------------------------------------------|--------------------------------------------------------------------------------------------|------------------------------------------------------------------------------------------------------------------------------------|
| <b>PULSE SEQUENCE</b><br>Relax. delay 2.000 sec<br>Pulse 30.0 degrees<br>Acq. time 1.049 sec<br>Width 31250.0 Hz<br>480 repetitions | <b>OBSERVE</b> C13, 100.6017120<br><b>DECOUPLE</b> H1, 400.0881679<br>Power 35 dB<br>continuously on<br>WALTZ-16 modulated | <b>DATA PROCESSING</b><br>Line broadening 0.5 Hz<br>FT size 65536<br>Total time 24 minutes | jpm 14 Nov 2013<br>5tBuDAC<br><br>Solvent: c6d6<br>Ambient temperature<br>Operator: moerdj<br>File: CARBON_01<br>VNMR-400 "nhb400" |
|-------------------------------------------------------------------------------------------------------------------------------------|----------------------------------------------------------------------------------------------------------------------------|--------------------------------------------------------------------------------------------|------------------------------------------------------------------------------------------------------------------------------------|

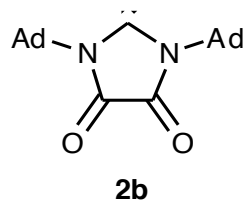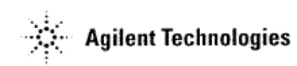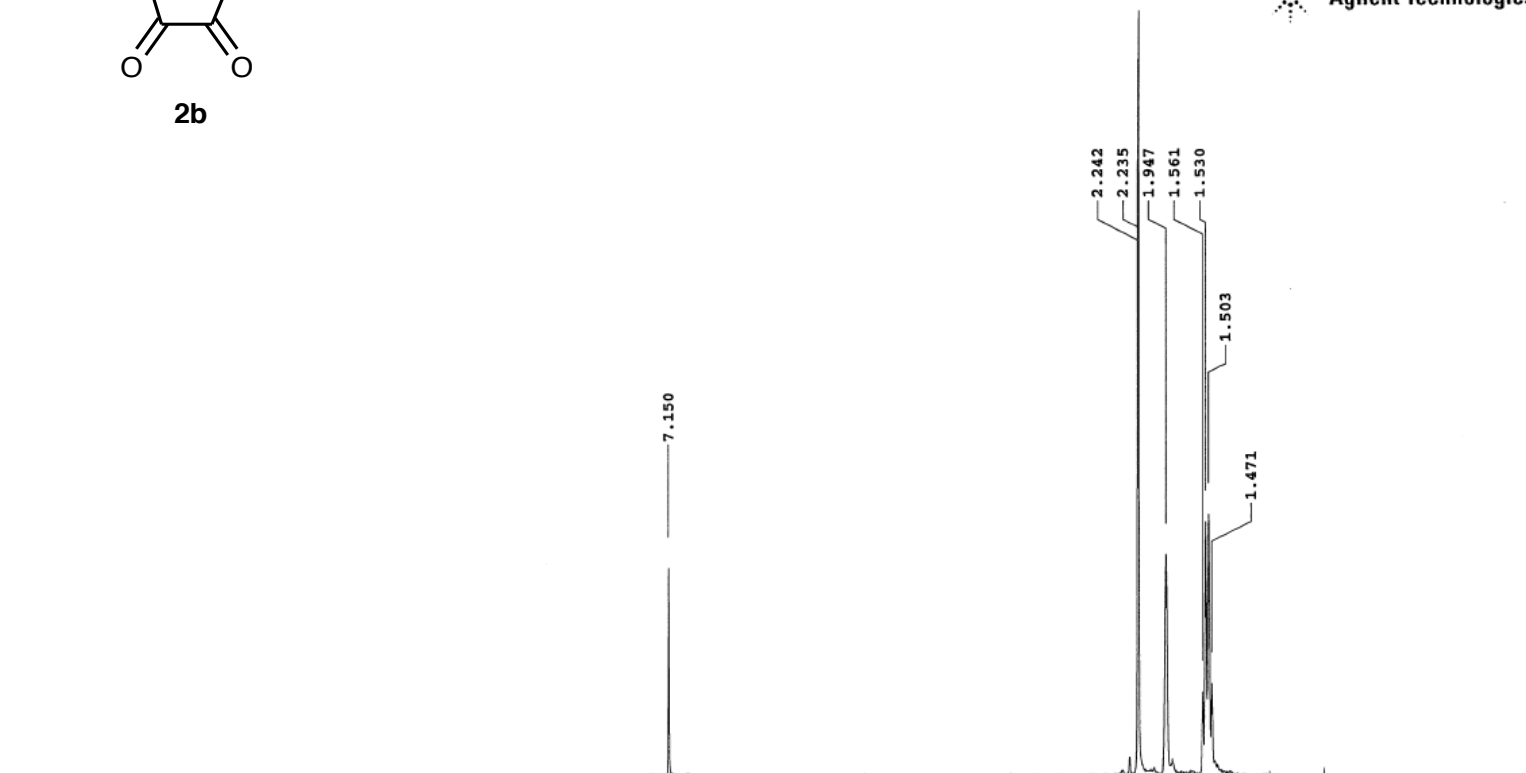

|                                                                                                                                  |                                |                                                                |                   |                                                                                                                               |
|----------------------------------------------------------------------------------------------------------------------------------|--------------------------------|----------------------------------------------------------------|-------------------|-------------------------------------------------------------------------------------------------------------------------------|
| <b>PULSE SEQUENCE</b><br>Relax. delay 2.000 sec<br>Pulse 45.0 degrees<br>Acq. time 2.556 sec<br>Width 6410.3 Hz<br>8 repetitions | <b>OBSERVE</b> H1, 400.0861546 | <b>DATA PROCESSING</b><br>FT size 32768<br>Total time 1 minute | 6.03 6.21<br>3.00 | jpm 17 Jan 2014<br>5AddAC<br>Solvent: c6d6<br>Ambient temperature<br>Operator: moerdj<br>File: PROTON_01<br>VMRS-400 "nhb400" |
|----------------------------------------------------------------------------------------------------------------------------------|--------------------------------|----------------------------------------------------------------|-------------------|-------------------------------------------------------------------------------------------------------------------------------|

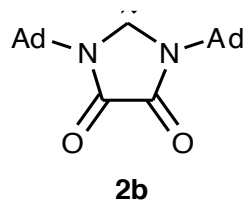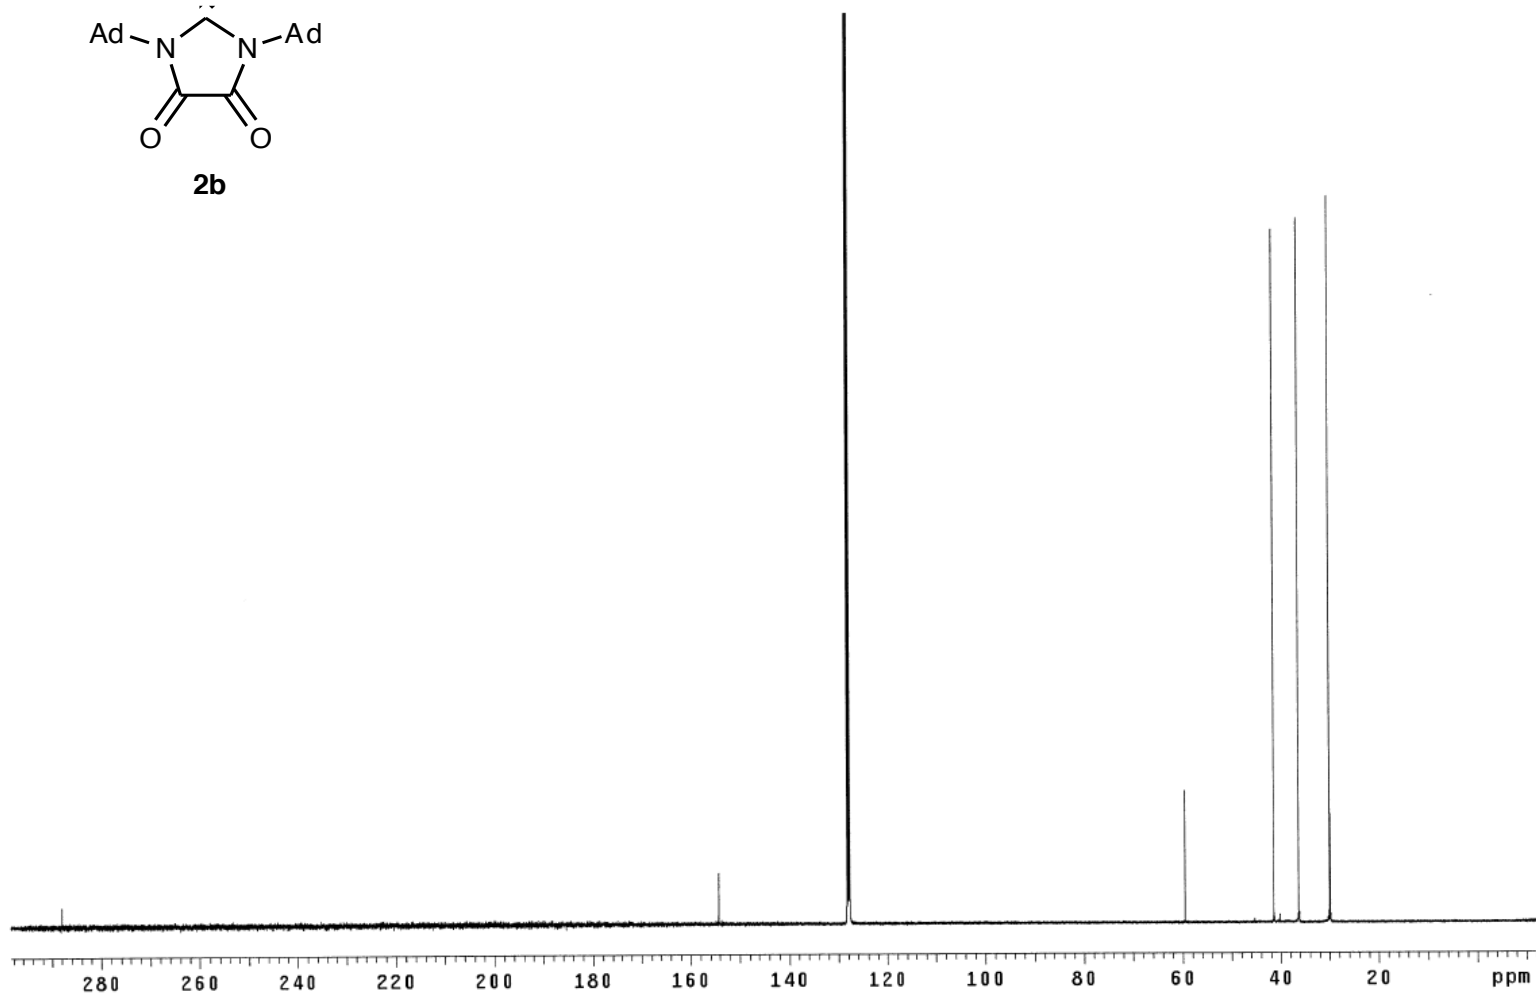

|                                                                                                                                       |                                                                                                                            |                                                                                           |                                                                                                                         |
|---------------------------------------------------------------------------------------------------------------------------------------|----------------------------------------------------------------------------------------------------------------------------|-------------------------------------------------------------------------------------------|-------------------------------------------------------------------------------------------------------------------------|
| <b>PULSE SEQUENCE</b><br>Relax. delay 2.000 sec<br>Pulse 30.0 degrees<br>Acq. time 1.049 sec<br>Width 31250.0 Hz<br>10000 repetitions | <b>OBSERVE</b> C13, 100.6017120<br><b>DECOUPLE</b> H1, 400.0881679<br>Power 35 dB<br>continuously on<br>WALTZ-16 modulated | <b>DATA PROCESSING</b><br>Line broadening 0.5 Hz<br>FT size 65536<br>Total time 8.5 hours | <b>jpm20_5AdDAC</b><br>Solvent: c6d6<br>Ambient temperature<br>Operator: moerdj<br>File: CARBON_02<br>VNMRS-400 "nhbjr" |
|---------------------------------------------------------------------------------------------------------------------------------------|----------------------------------------------------------------------------------------------------------------------------|-------------------------------------------------------------------------------------------|-------------------------------------------------------------------------------------------------------------------------|



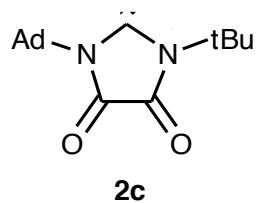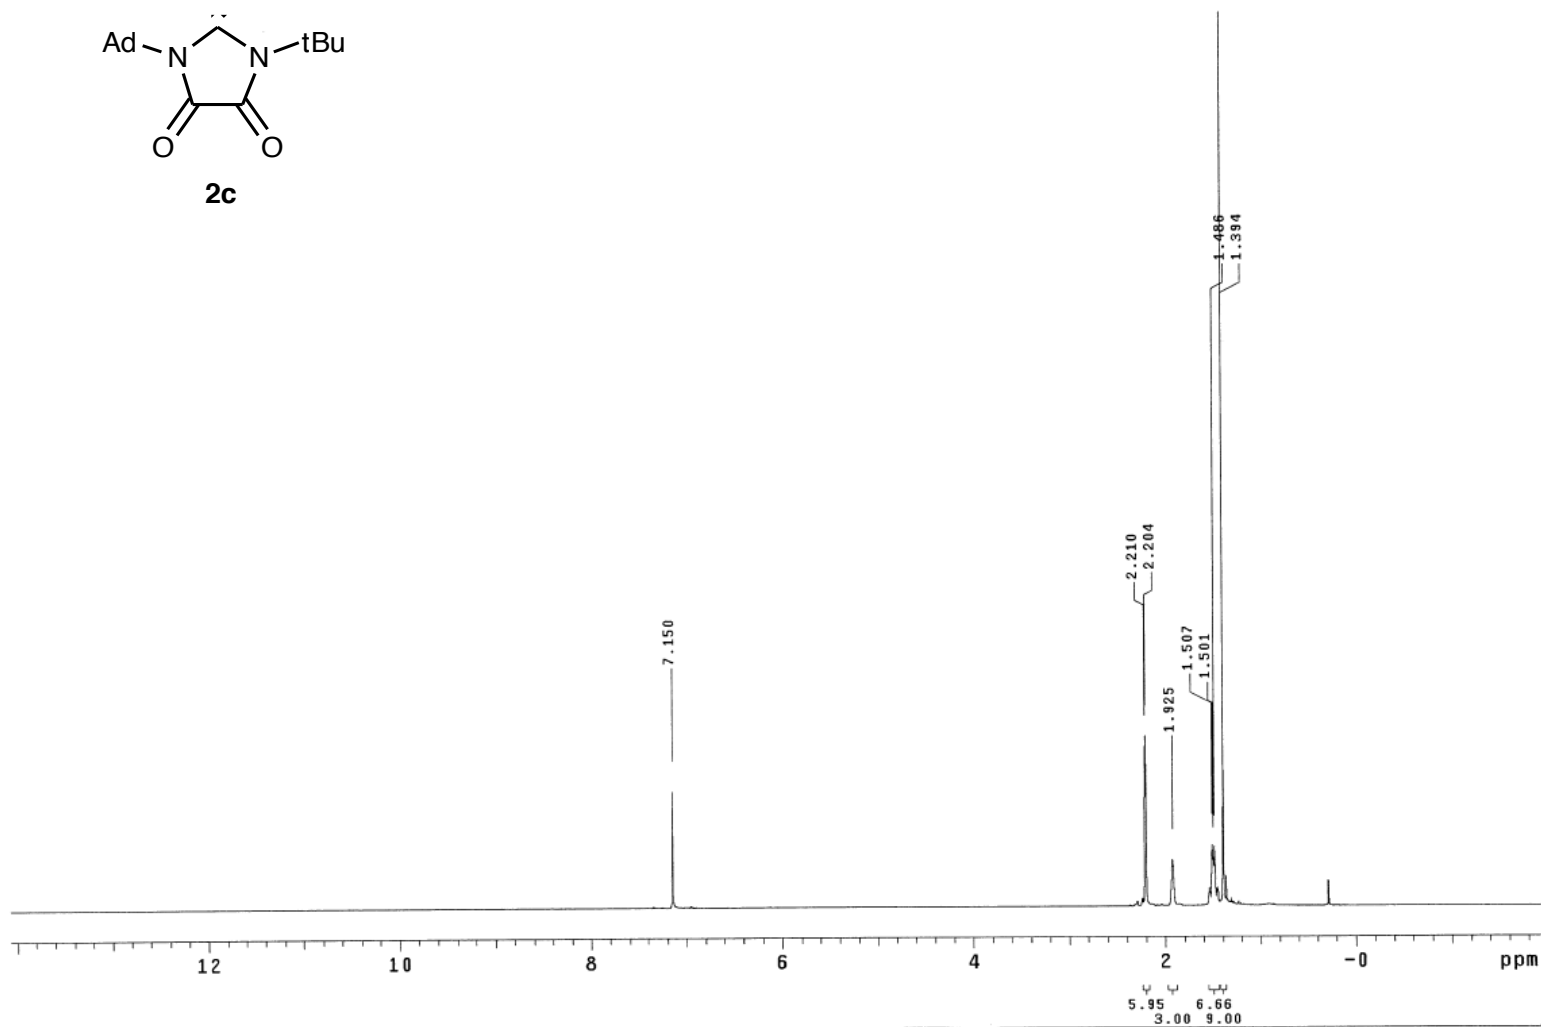

|                                                                                                                                  |                                |  |  |                                                                                                                                            |
|----------------------------------------------------------------------------------------------------------------------------------|--------------------------------|--|--|--------------------------------------------------------------------------------------------------------------------------------------------|
| <b>PULSE SEQUENCE</b><br>Relax. delay 2.000 sec<br>Pulse 45.0 degrees<br>Acq. time 2.556 sec<br>Width 6410.3 Hz<br>8 repetitions | <b>OBSERVE</b> H1, 399.6757434 |  |  | jpm 21 Jan 2014<br>5AdtBu0AC<br>Archive directory: /home/<br>Sample directory: jpm21_5<br>Pulse Sequence: s2pul<br>90deg/15.06d6 / 298.1 K |
|----------------------------------------------------------------------------------------------------------------------------------|--------------------------------|--|--|--------------------------------------------------------------------------------------------------------------------------------------------|

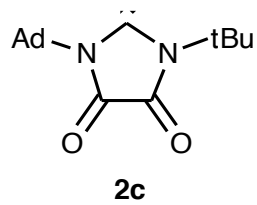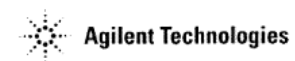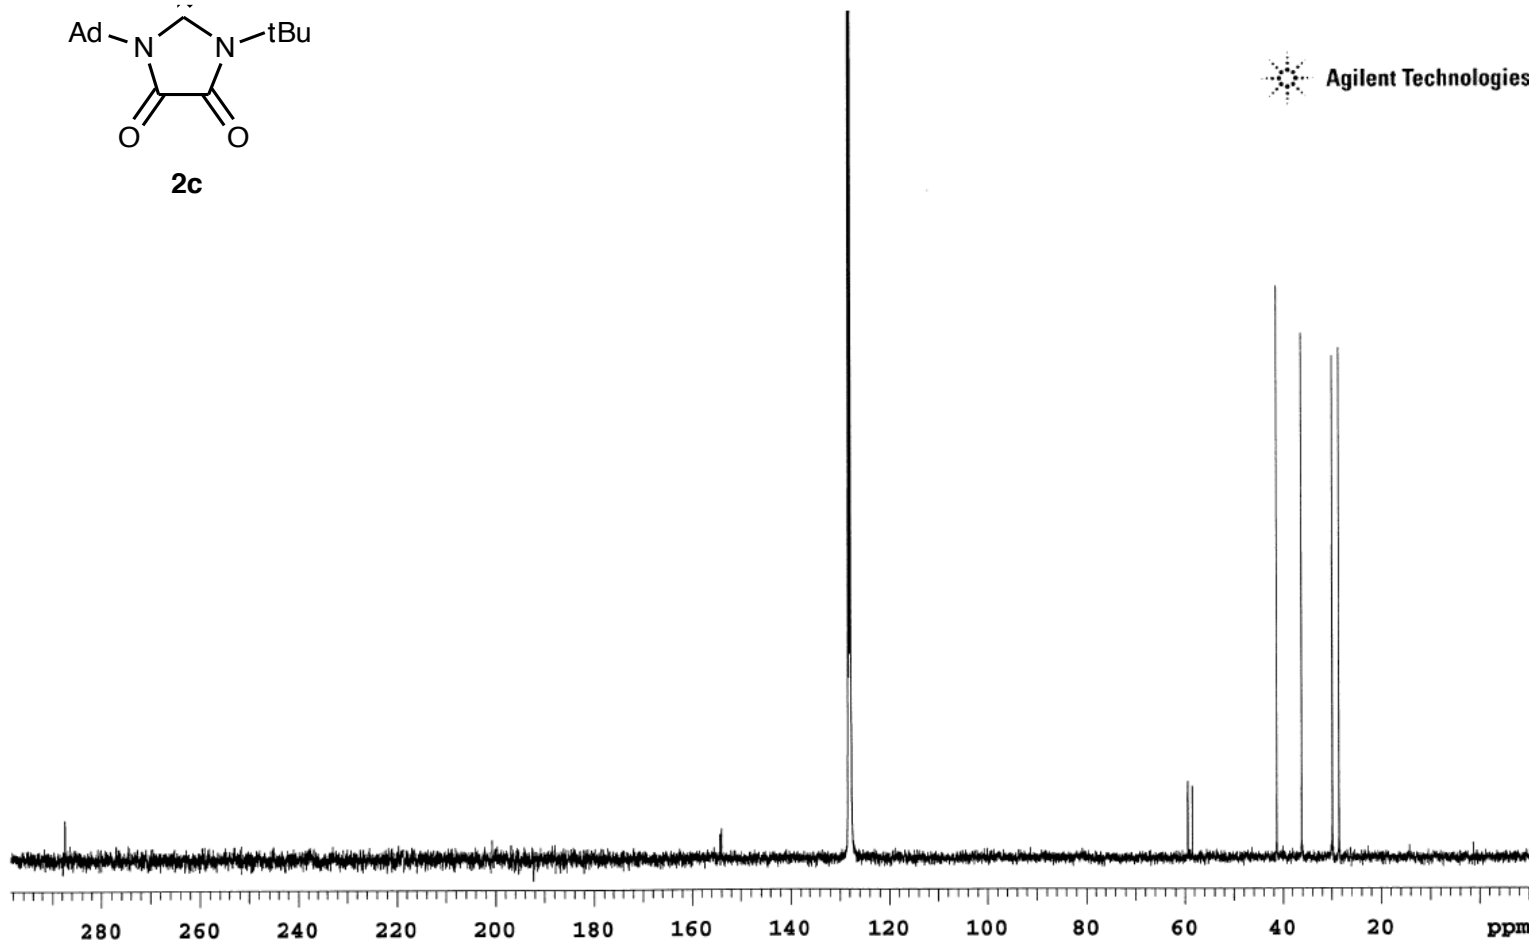

|                                                                                                                                     |                                                                                                                            |                                                                                            |  |                                                                                                                     |
|-------------------------------------------------------------------------------------------------------------------------------------|----------------------------------------------------------------------------------------------------------------------------|--------------------------------------------------------------------------------------------|--|---------------------------------------------------------------------------------------------------------------------|
| <b>PULSE SEQUENCE</b><br>Relax. delay 2.000 sec<br>Pulse 30.0 degrees<br>Acq. time 1.049 sec<br>Width 31250.0 Hz<br>528 repetitions | <b>OBSERVE</b> C13, 100.6017130<br><b>DECOUPLE</b> H1, 400.0881679<br>Power 35 dB<br>continuously on<br>WALTZ-16 modulated | <b>DATA PROCESSING</b><br>Line broadening 2.0 Hz<br>FT size 65536<br>Total time 26 minutes |  | jpm 21 Jan 2014<br>5AdtBuDAC<br><hr/> Solvent: c6d6<br>Ambient temperature<br>Operator: moerdj<br>VMRS-400 "nhb400" |
|-------------------------------------------------------------------------------------------------------------------------------------|----------------------------------------------------------------------------------------------------------------------------|--------------------------------------------------------------------------------------------|--|---------------------------------------------------------------------------------------------------------------------|

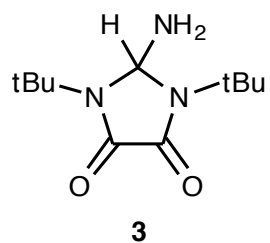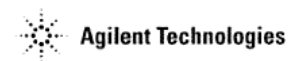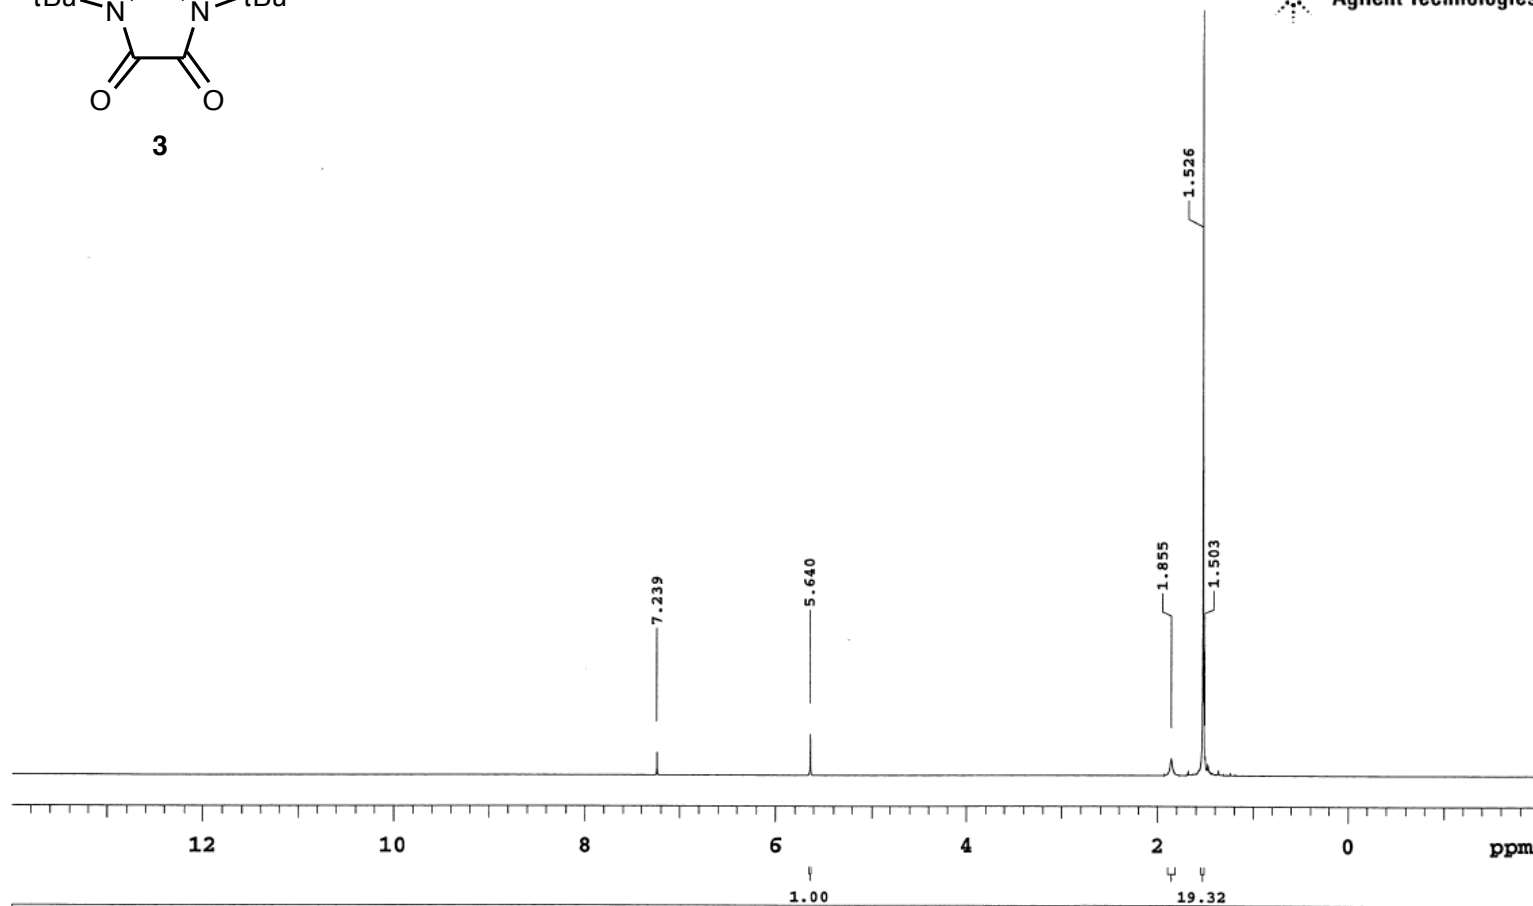

|                                                                                                                                   |                                |                                                                |               |                                                                                                                                    |
|-----------------------------------------------------------------------------------------------------------------------------------|--------------------------------|----------------------------------------------------------------|---------------|------------------------------------------------------------------------------------------------------------------------------------|
| <b>PULSE SEQUENCE</b><br>Relax. delay 2.000 sec<br>Pulse 45.0 degrees<br>Acq. time 2.556 sec<br>Width 6410.3 Hz<br>16 repetitions | <b>OBSERVE</b> H1, 400.0861401 | <b>DATA PROCESSING</b><br>FT size 32768<br>Total time 1 minute | 2.00<br>19.32 | jpm 07 Jan 2014<br>5DAC + NH3<br>pentane 1 atm<br><br>Solvent: cdcl3<br>Ambient temperature<br>Operator: moerdj<br>File: PROTON_01 |
|-----------------------------------------------------------------------------------------------------------------------------------|--------------------------------|----------------------------------------------------------------|---------------|------------------------------------------------------------------------------------------------------------------------------------|

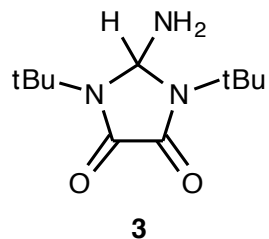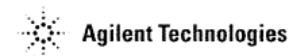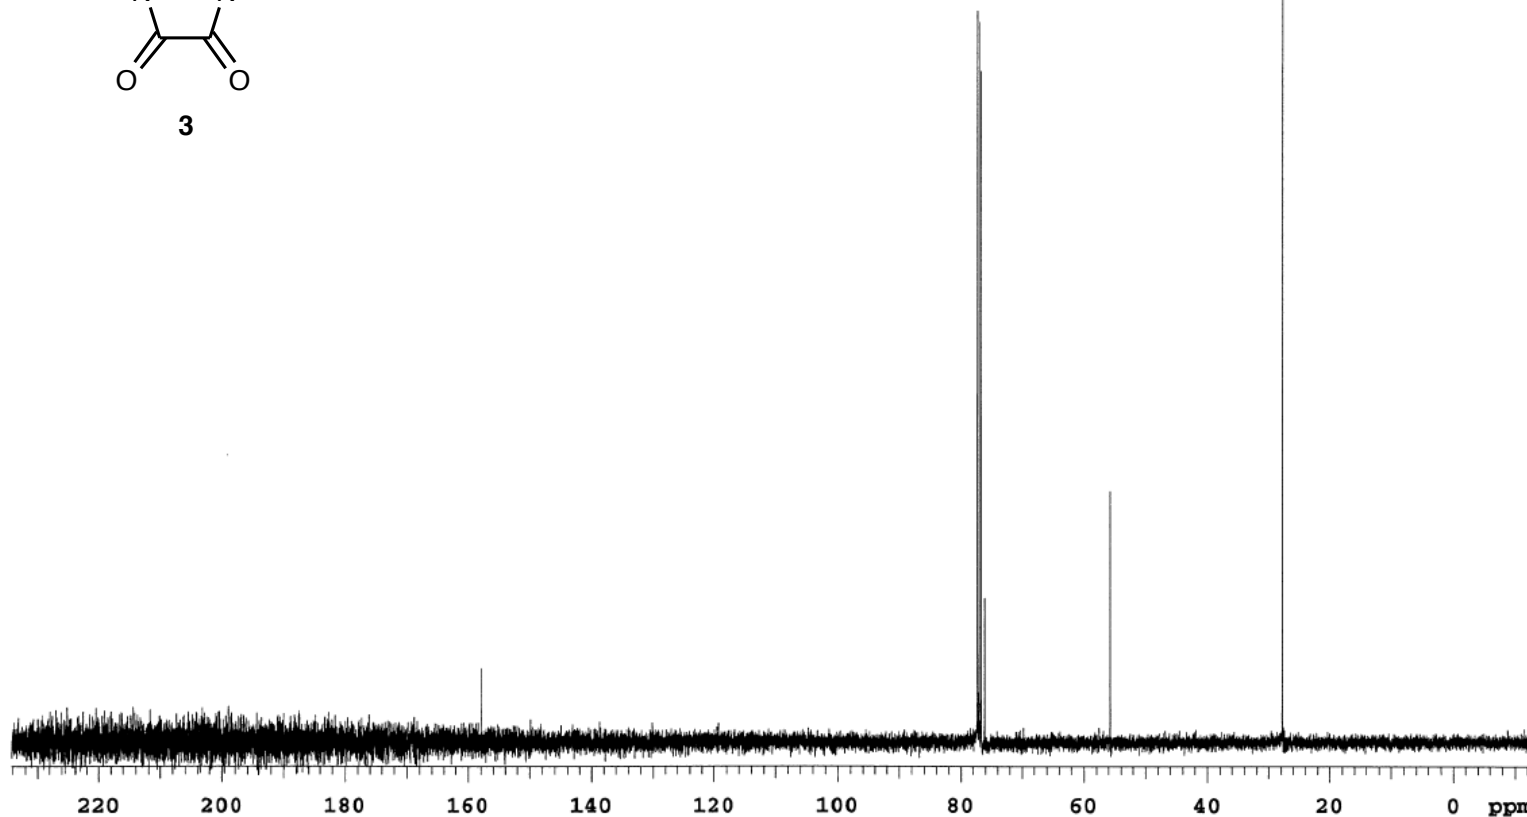

|                                                                                                                                     |                                                                                                                            |                                                                                            |                                                                                                                                      |
|-------------------------------------------------------------------------------------------------------------------------------------|----------------------------------------------------------------------------------------------------------------------------|--------------------------------------------------------------------------------------------|--------------------------------------------------------------------------------------------------------------------------------------|
| <b>PULSE SEQUENCE</b><br>Relax. delay 2.000 sec<br>Pulse 30.0 degrees<br>Acq. time 1.311 sec<br>Width 25000.0 Hz<br>688 repetitions | <b>OBSERVE</b> C13, 100.6017396<br><b>DECOUPLE</b> H1, 400.0881319<br>Power 35 dB<br>continuously on<br>WALTZ-16 modulated | <b>DATA PROCESSING</b><br>Line broadening 0.5 Hz<br>FT size 65536<br>Total time 37 minutes | jpm 07 Jan 2014<br>5DACNH3<br><br>Solvent: cdcl3<br>Ambient temperature<br>Operator: moerdj<br>File: CARBON_01<br>VNMR5-400 "nhb400" |
|-------------------------------------------------------------------------------------------------------------------------------------|----------------------------------------------------------------------------------------------------------------------------|--------------------------------------------------------------------------------------------|--------------------------------------------------------------------------------------------------------------------------------------|

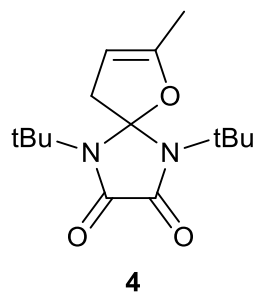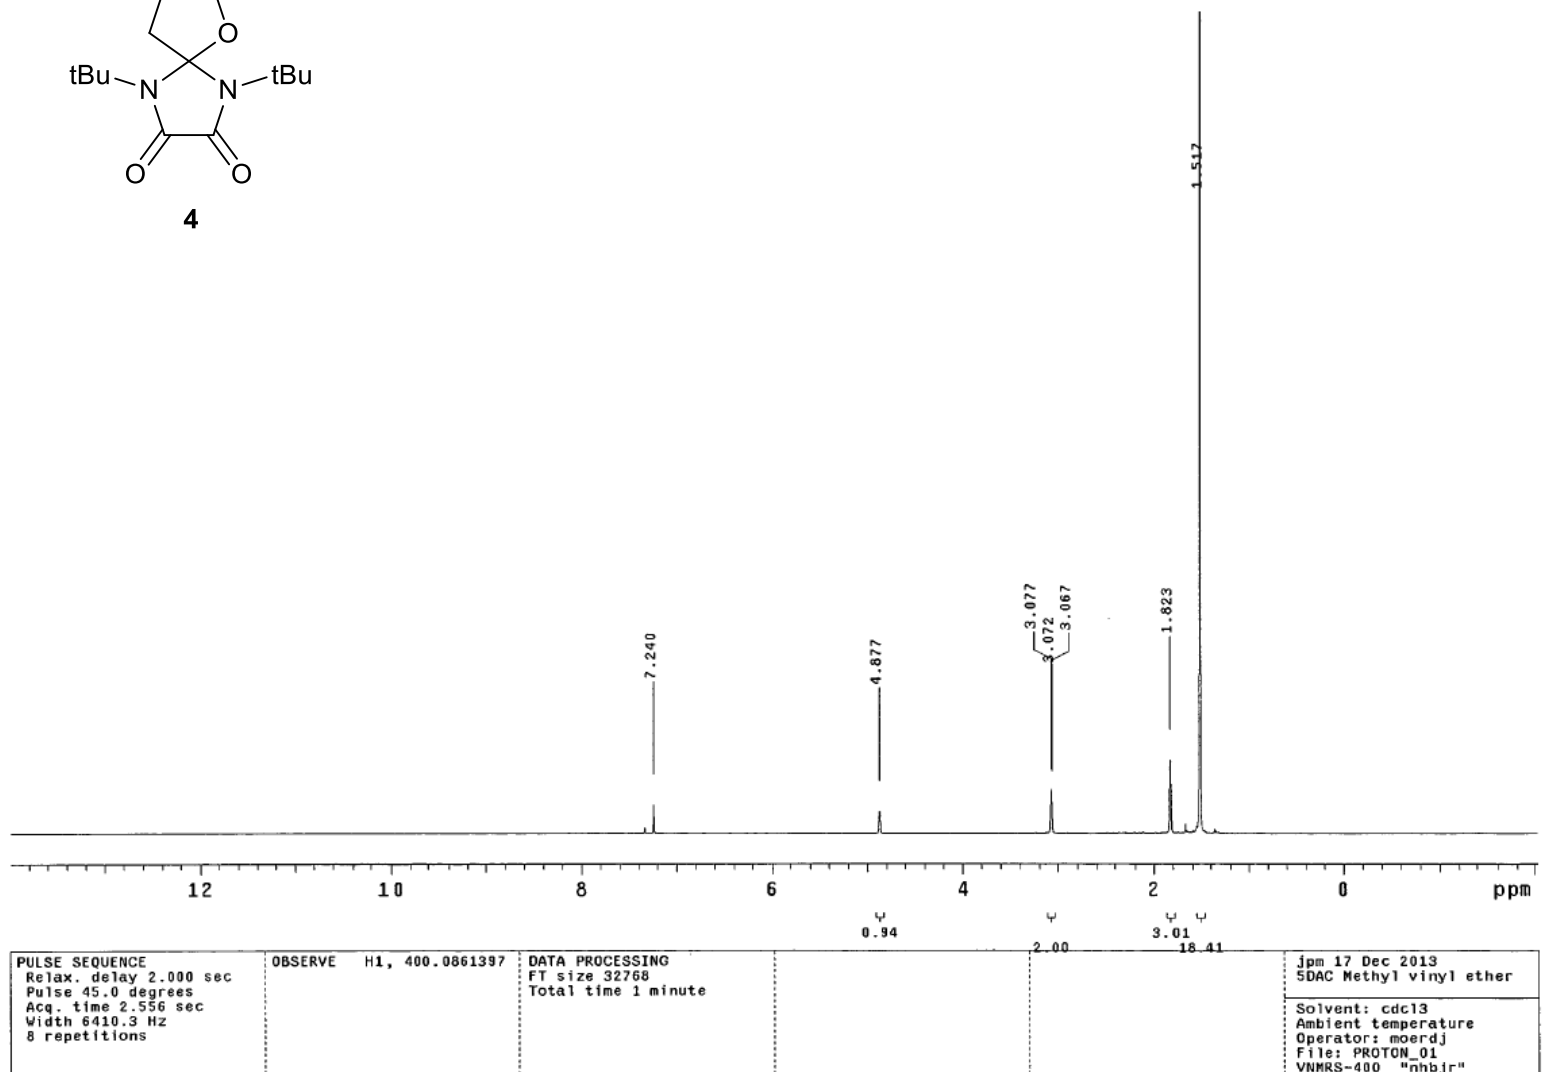

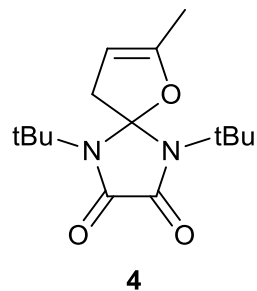

Agilent Technologies

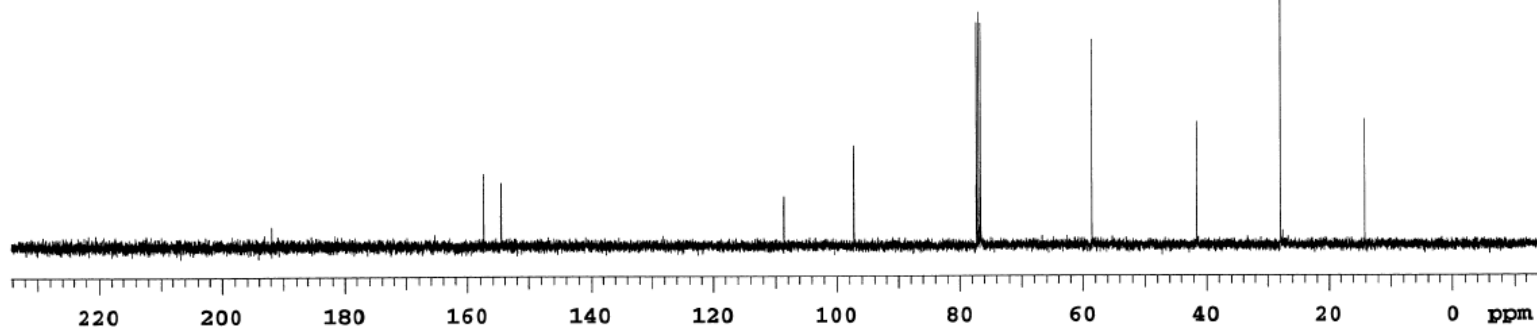

|                                                                                                                                    |                                                                                                                            |                                                                                           |                                                                                                                                    |
|------------------------------------------------------------------------------------------------------------------------------------|----------------------------------------------------------------------------------------------------------------------------|-------------------------------------------------------------------------------------------|------------------------------------------------------------------------------------------------------------------------------------|
| <b>PULSE SEQUENCE</b><br>Relax. delay 2.000 sec<br>Pulse 30.0 degrees<br>Acq. time 1.311 sec<br>Width 25000.0 Hz<br>48 repetitions | <b>OBSERVE</b> C13, 100.6017435<br><b>DECOUPLE</b> H1, 400.0881319<br>Power 35 dB<br>continuously on<br>WALTZ-16 modulated | <b>DATA PROCESSING</b><br>Line broadening 0.5 Hz<br>FT size 65536<br>Total time 2 minutes | jpm 17 Dec 2013<br>5DAC Methyl vinyl ketone<br><br>Solvent: cdcl3<br>Ambient temperature<br>Operator: moerdj<br>VNMRS-400 "nhb400" |
|------------------------------------------------------------------------------------------------------------------------------------|----------------------------------------------------------------------------------------------------------------------------|-------------------------------------------------------------------------------------------|------------------------------------------------------------------------------------------------------------------------------------|

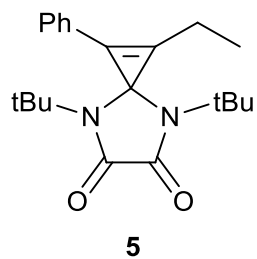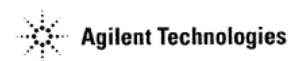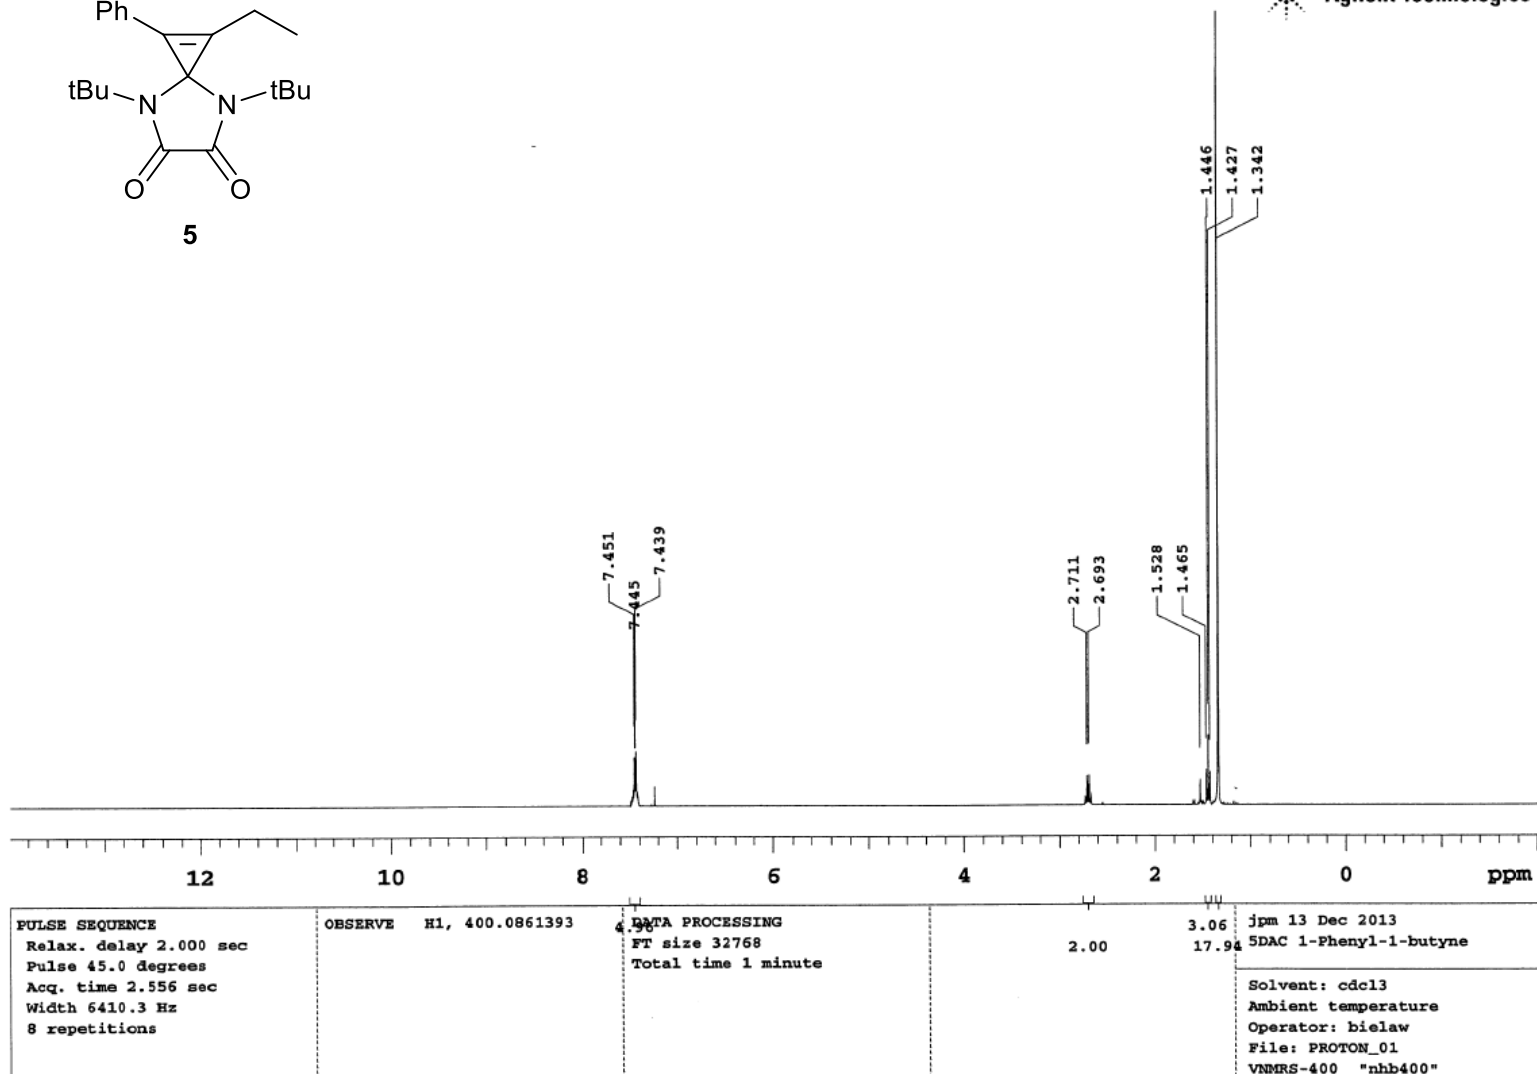

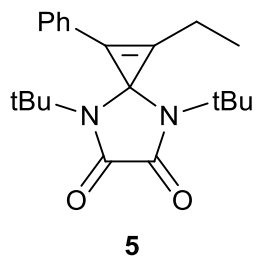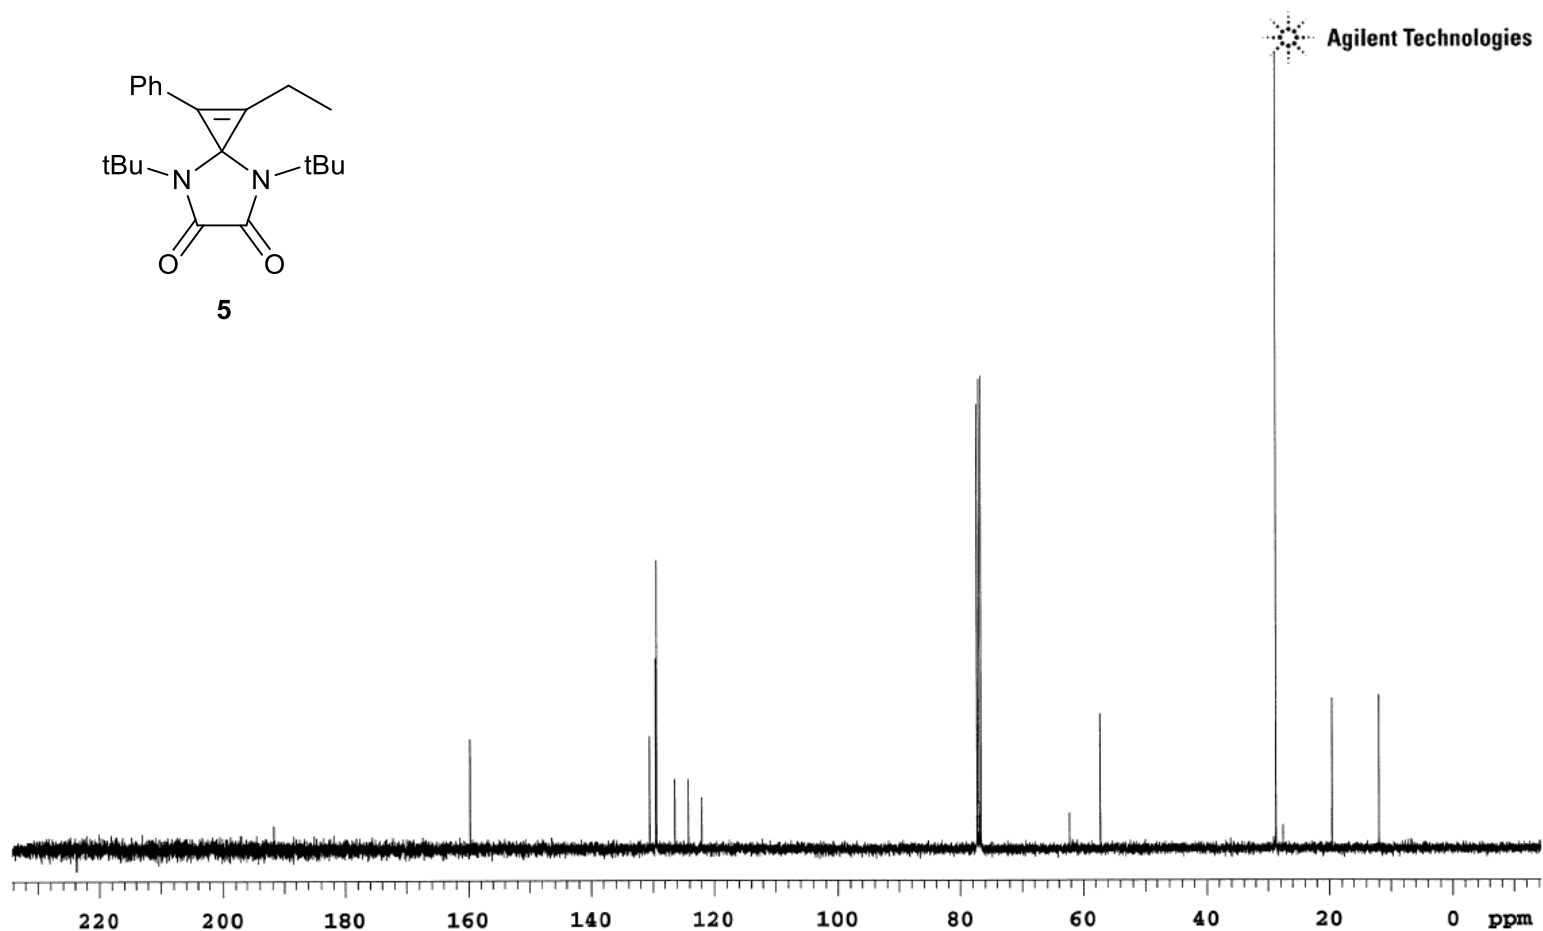

|                                                                                                                                     |                                                                                                                            |                                                                                            |  |                                                                                                                                  |
|-------------------------------------------------------------------------------------------------------------------------------------|----------------------------------------------------------------------------------------------------------------------------|--------------------------------------------------------------------------------------------|--|----------------------------------------------------------------------------------------------------------------------------------|
| <b>PULSE SEQUENCE</b><br>Relax. delay 2.000 sec<br>Pulse 30.0 degrees<br>Acq. time 1.311 sec<br>Width 25000.0 Hz<br>224 repetitions | <b>OBSERVE</b> C13, 100.6017419<br><b>DECOUPLE</b> H1, 400.0881319<br>Power 35 dB<br>continuously on<br>WALTZ-16 modulated | <b>DATA PROCESSING</b><br>Line broadening 0.5 Hz<br>FT size 65536<br>Total time 12 minutes |  | jpm 13 Dec 2013<br>SDAC 1-Phenyl-1-butyne<br><br>Solvent: cdcl3<br>Ambient temperature<br>Operator: bielaw<br>VNMRS-400 "nhb400" |
|-------------------------------------------------------------------------------------------------------------------------------------|----------------------------------------------------------------------------------------------------------------------------|--------------------------------------------------------------------------------------------|--|----------------------------------------------------------------------------------------------------------------------------------|



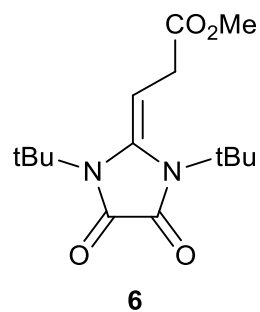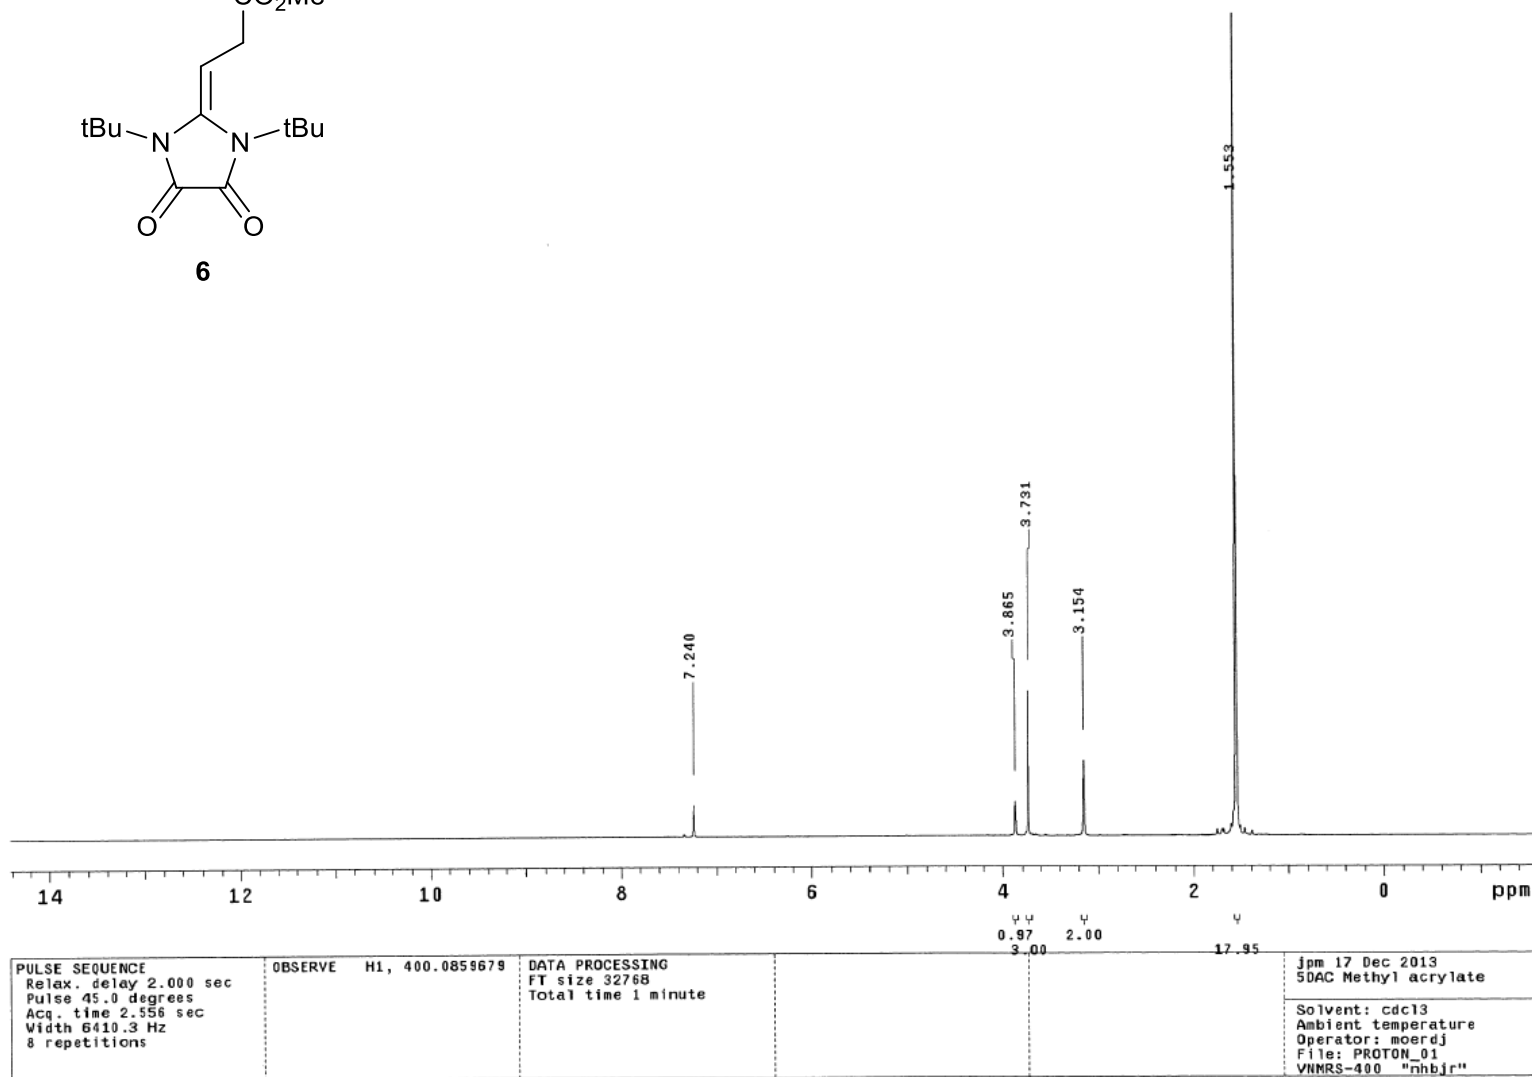

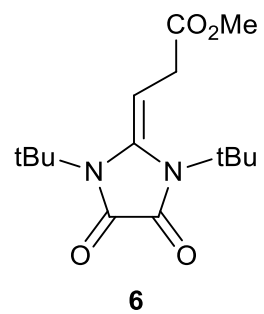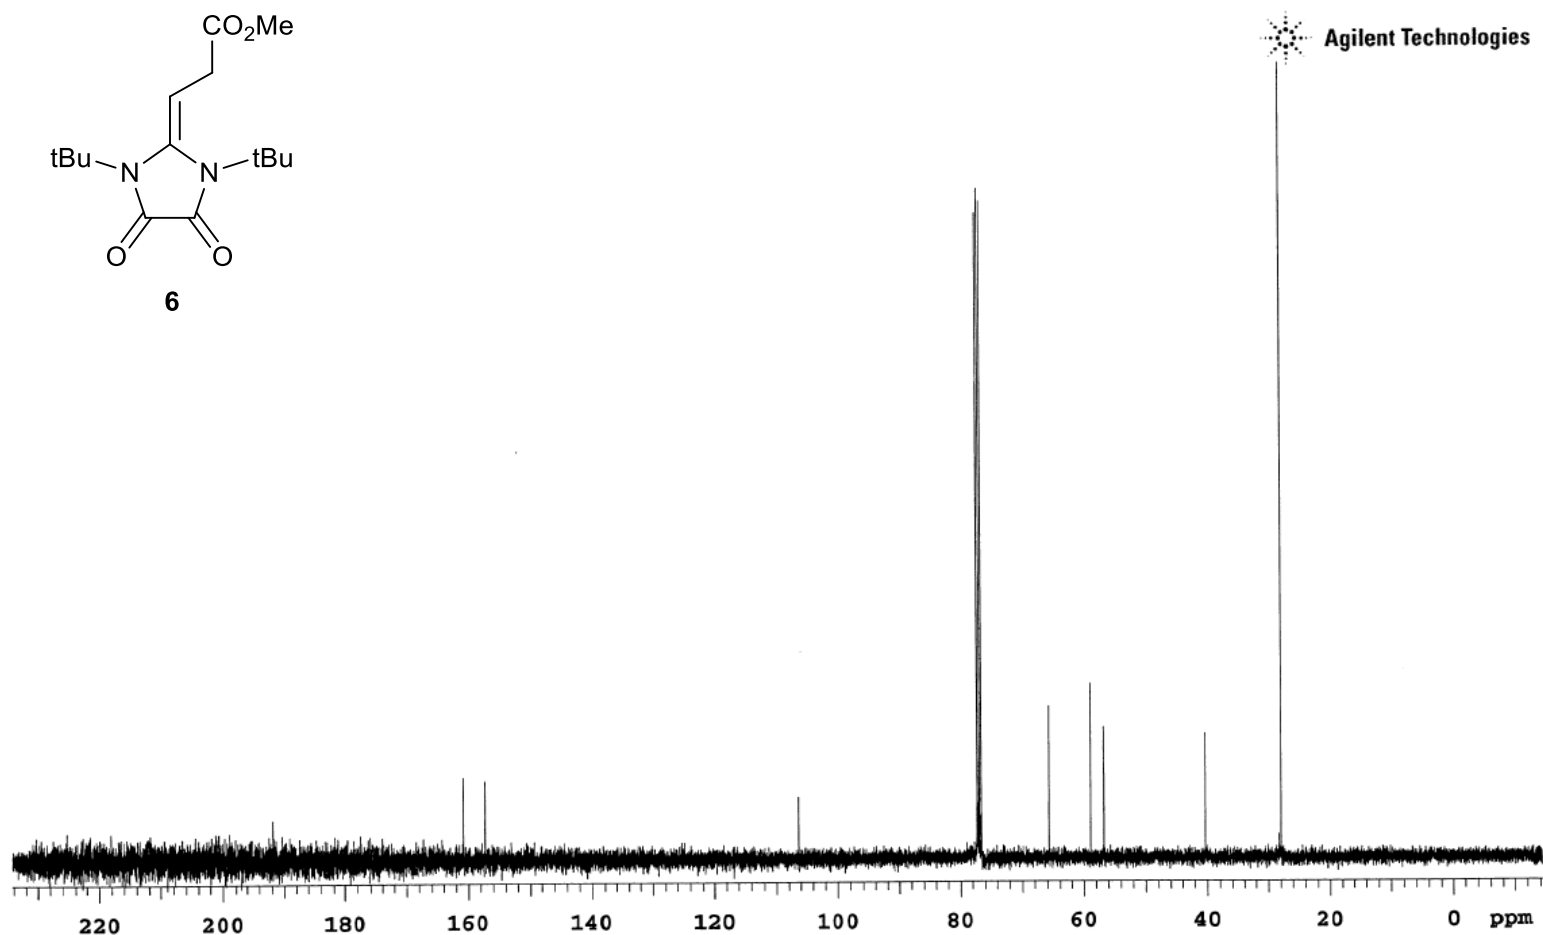

|                                                                                                                                     |                                                                                                                            |                                                                                            |                                                                                                                                |
|-------------------------------------------------------------------------------------------------------------------------------------|----------------------------------------------------------------------------------------------------------------------------|--------------------------------------------------------------------------------------------|--------------------------------------------------------------------------------------------------------------------------------|
| <b>PULSE SEQUENCE</b><br>Relax. delay 2.000 sec<br>Pulse 30.0 degrees<br>Acq. time 1.311 sec<br>Width 25000.0 Hz<br>272 repetitions | <b>OBSERVE</b> C13, 100.6017404<br><b>DECOUPLE</b> H1, 400.0881319<br>Power 35 dB<br>continuously on<br>WALTZ-16 modulated | <b>DATA PROCESSING</b><br>Line broadening 0.5 Hz<br>FT size 65536<br>Total time 15 minutes | jpm 17 Dec 2013<br>5DACMethylacrylate<br><hr/> Solvent: cdcl3<br>Ambient temperature<br>Operator: moerdj<br>VNMRS-400 "nhb400" |
|-------------------------------------------------------------------------------------------------------------------------------------|----------------------------------------------------------------------------------------------------------------------------|--------------------------------------------------------------------------------------------|--------------------------------------------------------------------------------------------------------------------------------|

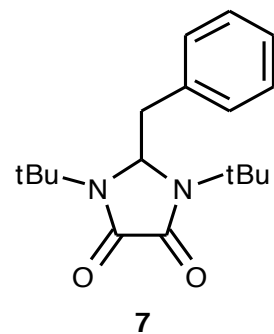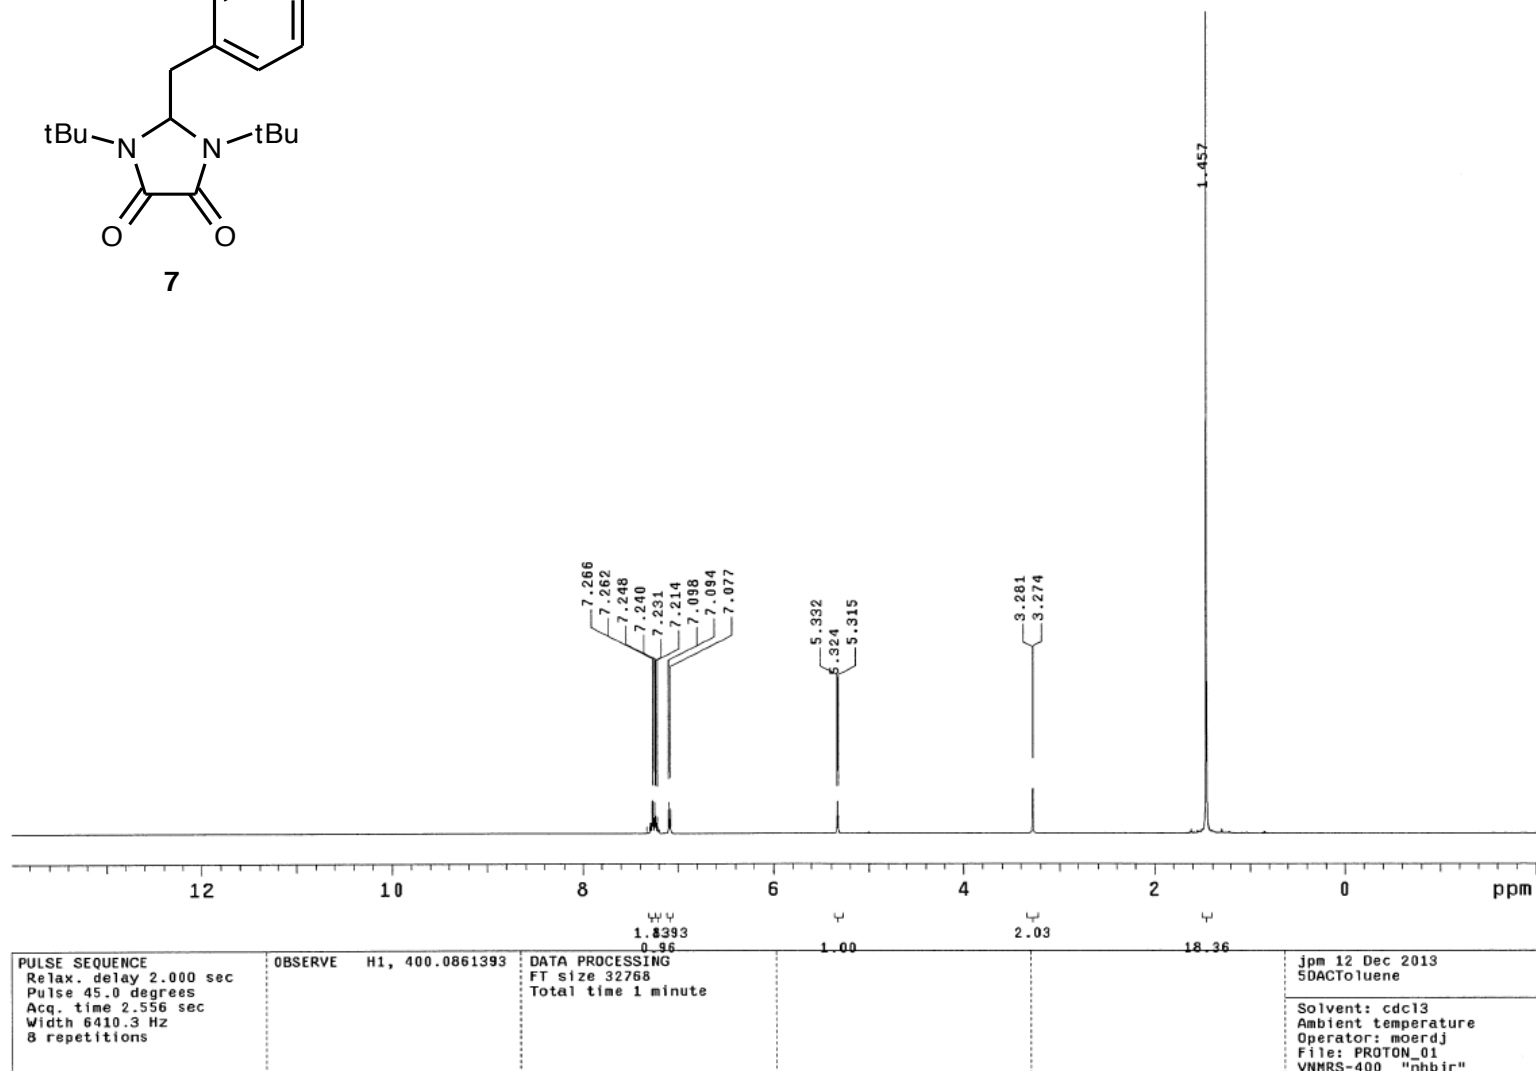

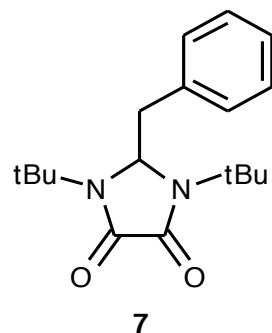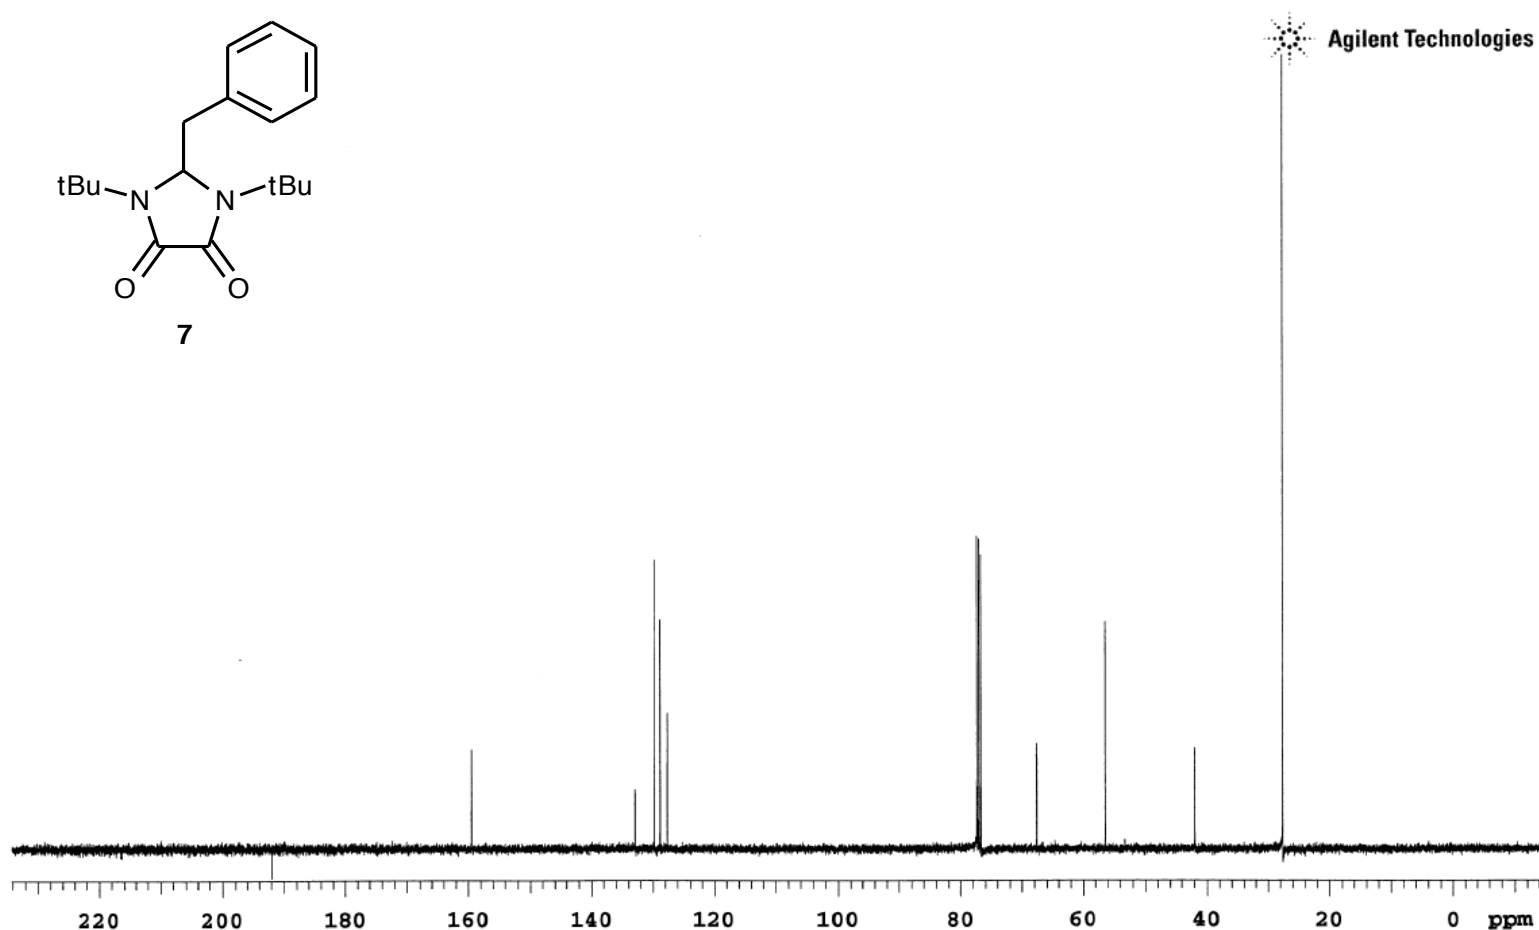

|                                                                                                                                     |                                                                                                                            |                                                                                           |                                                                                                                                      |
|-------------------------------------------------------------------------------------------------------------------------------------|----------------------------------------------------------------------------------------------------------------------------|-------------------------------------------------------------------------------------------|--------------------------------------------------------------------------------------------------------------------------------------|
| <b>PULSE SEQUENCE</b><br>Relax. delay 2.000 sec<br>Pulse 30.0 degrees<br>Acq. time 1.311 sec<br>Width 25000.0 Hz<br>128 repetitions | <b>OBSERVE</b> C13, 100.6017427<br><b>DECOUPLE</b> H1, 400.0861319<br>Power 35 dB<br>continuously on<br>WALTZ-16 modulated | <b>DATA PROCESSING</b><br>Line broadening 0.5 Hz<br>FT size 65536<br>Total time 7 minutes | jpm 12 Dec 2013<br>5DACToluene<br>Solvent: cdcl3<br>Ambient temperature<br>Operator: moerdj<br>File: CARBON_01<br>VNMRS-400 "nhb400" |
|-------------------------------------------------------------------------------------------------------------------------------------|----------------------------------------------------------------------------------------------------------------------------|-------------------------------------------------------------------------------------------|--------------------------------------------------------------------------------------------------------------------------------------|

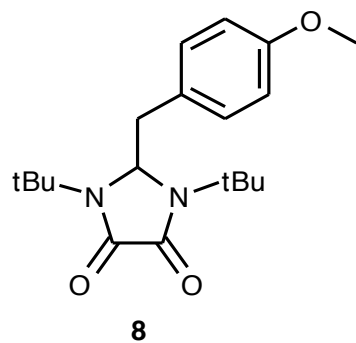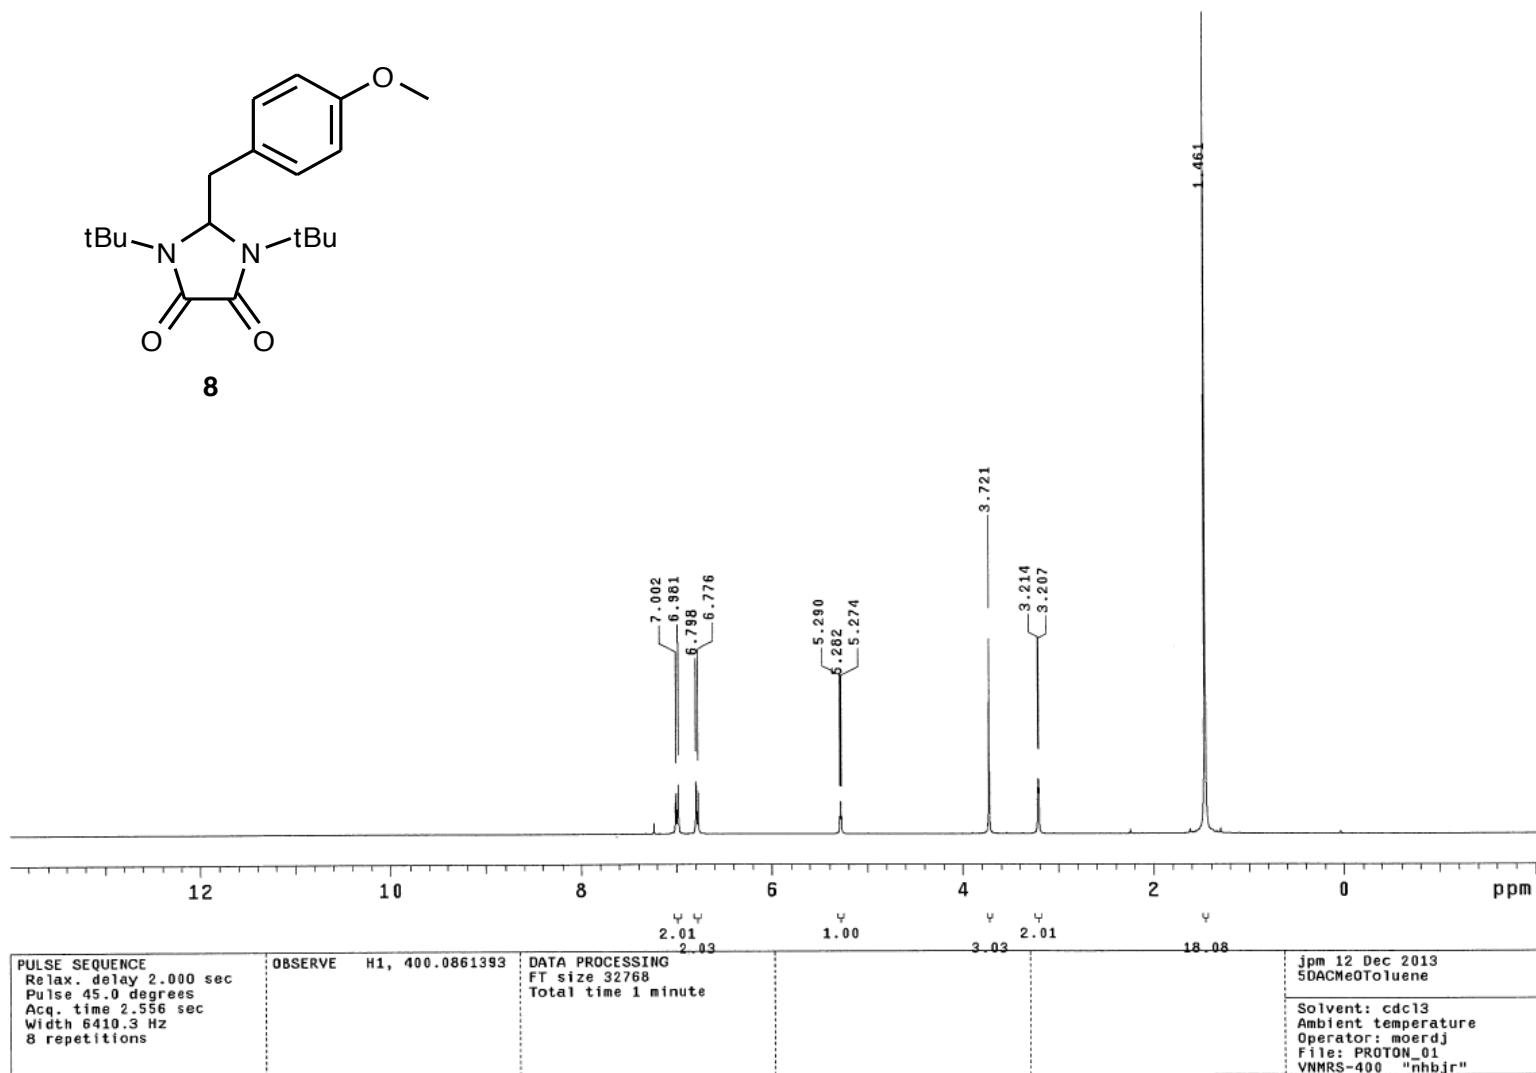

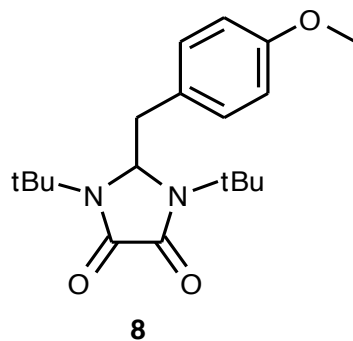

Agilent Technologies

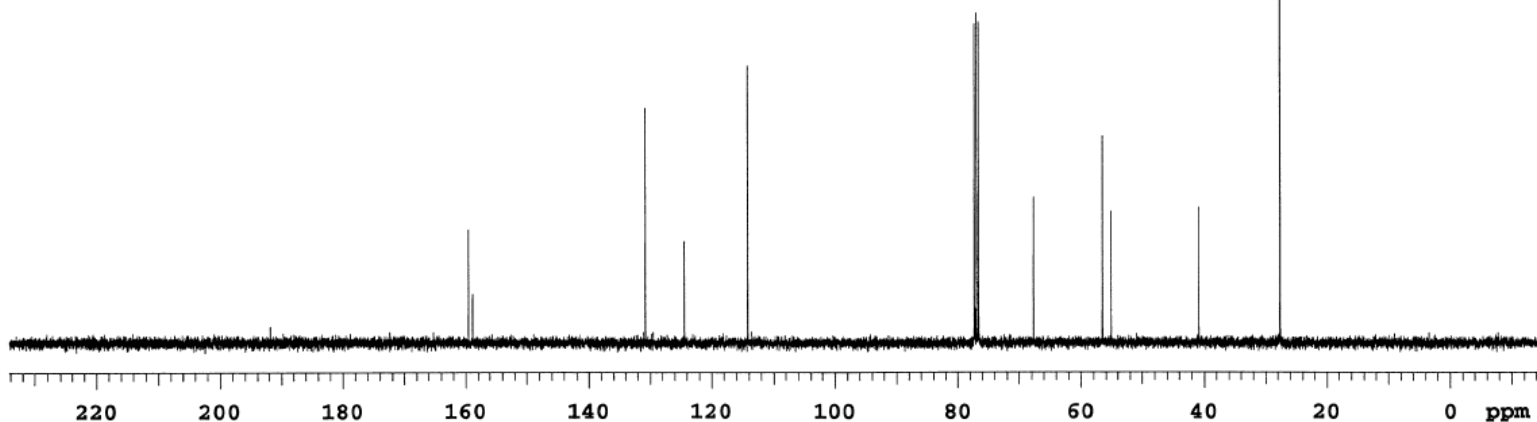

|                                                                                                                                    |                                                                                                                            |                                                                                           |                                                                                                                          |
|------------------------------------------------------------------------------------------------------------------------------------|----------------------------------------------------------------------------------------------------------------------------|-------------------------------------------------------------------------------------------|--------------------------------------------------------------------------------------------------------------------------|
| <b>PULSE SEQUENCE</b><br>Relax. delay 2.000 sec<br>Pulse 30.0 degrees<br>Acq. time 1.311 sec<br>Width 25000.0 Hz<br>96 repetitions | <b>OBSERVE</b> C13, 100.6017442<br><b>DECOUPLE</b> H1, 400.0881319<br>Power 35 dB<br>continuously on<br>WALTZ-16 modulated | <b>DATA PROCESSING</b><br>Line broadening 0.5 Hz<br>FT size 65536<br>Total time 5 minutes | jpm 12 Dec 2013<br>5DACMeOToluene<br><br>Solvent: cdcl3<br>Ambient temperature<br>Operator: moerdj<br>VNMRS-400 "nhb400" |
|------------------------------------------------------------------------------------------------------------------------------------|----------------------------------------------------------------------------------------------------------------------------|-------------------------------------------------------------------------------------------|--------------------------------------------------------------------------------------------------------------------------|

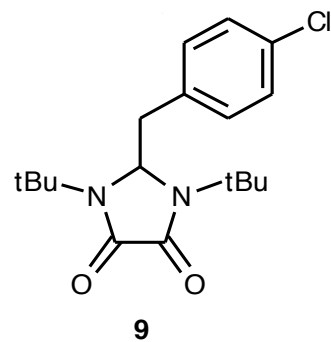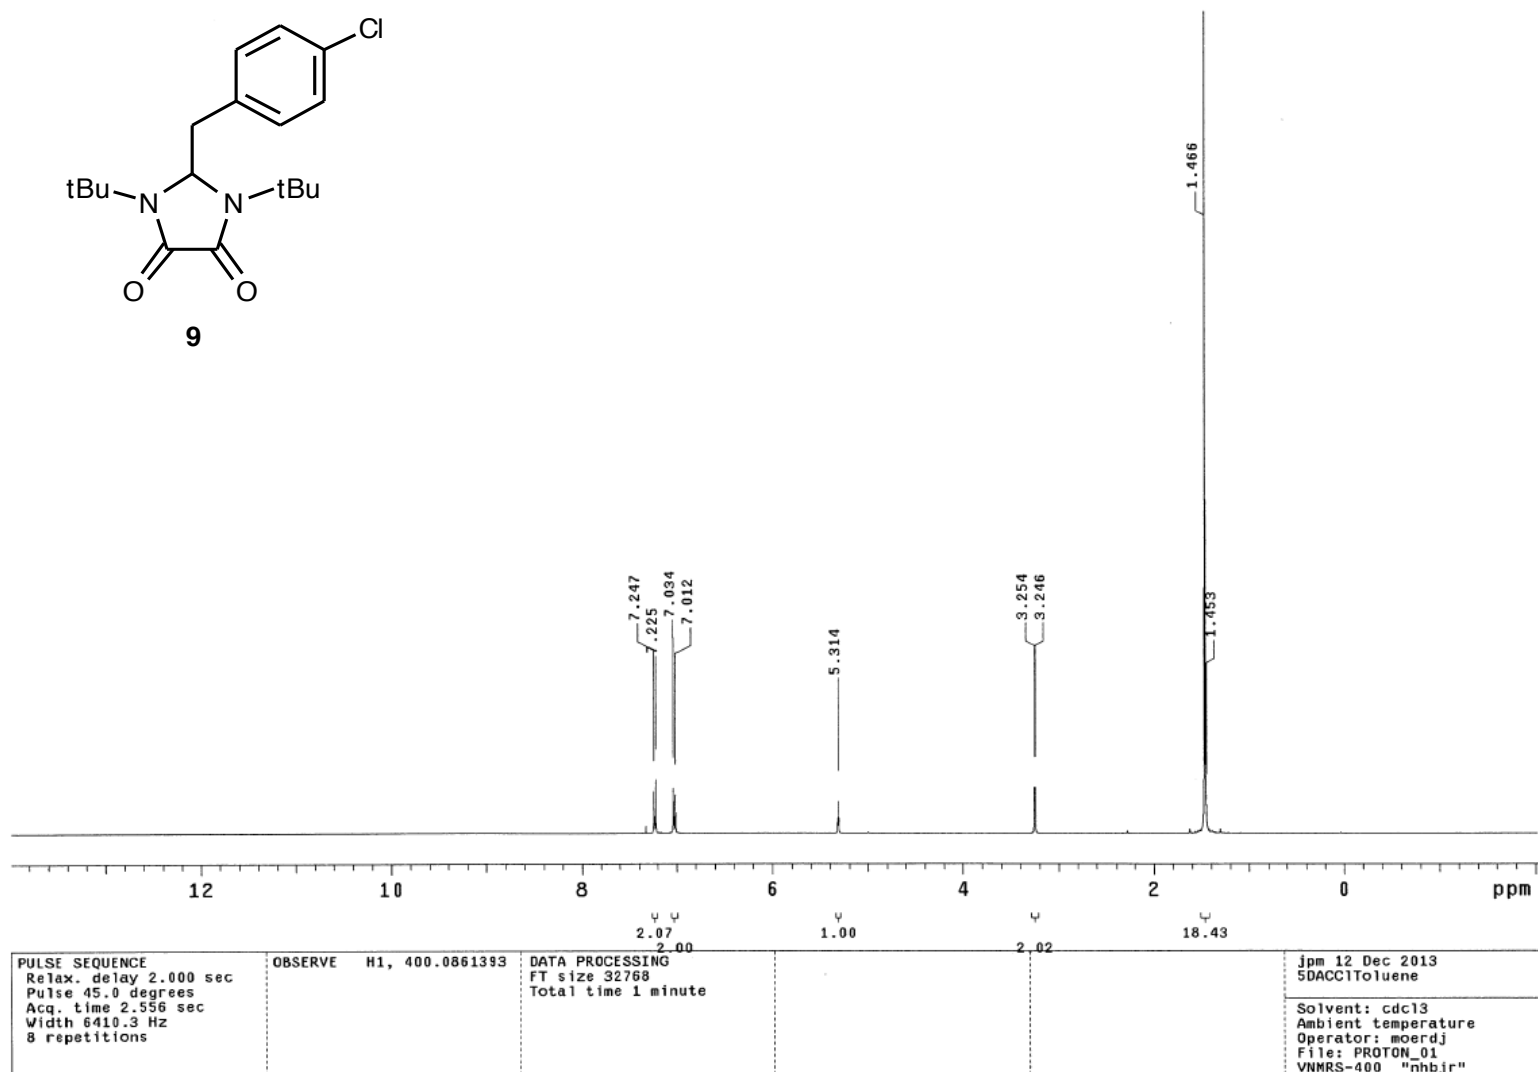

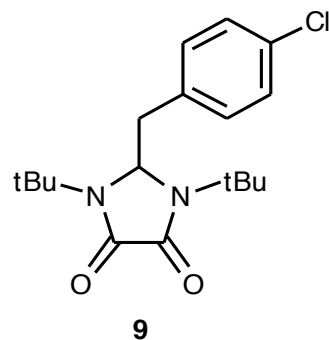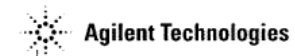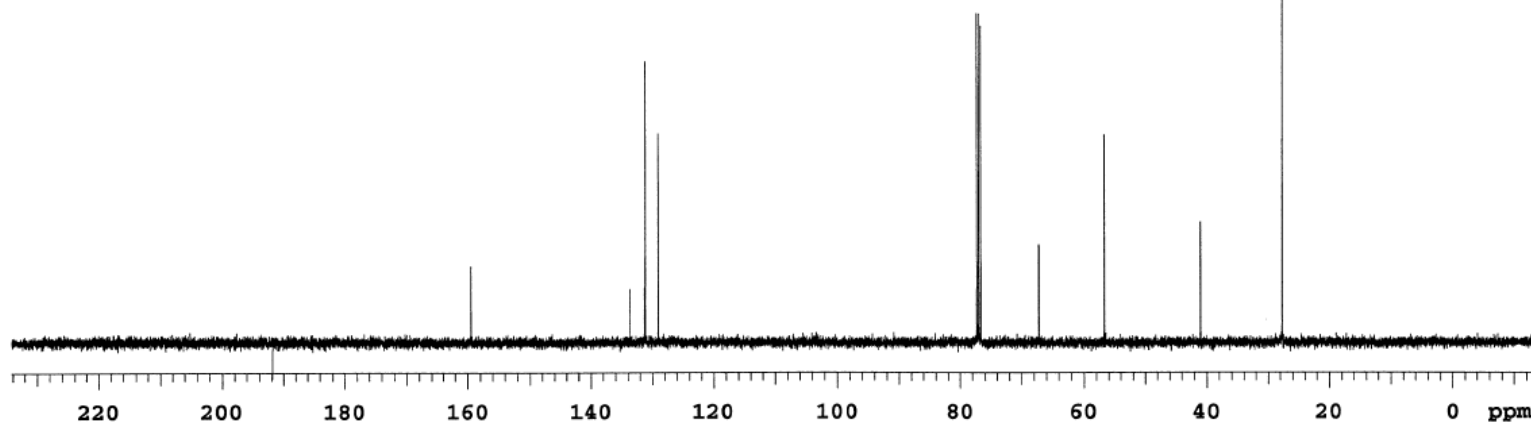

|                                                                                                                                    |                                                                                                                                   |                                                                                           |                                                                                                   |
|------------------------------------------------------------------------------------------------------------------------------------|-----------------------------------------------------------------------------------------------------------------------------------|-------------------------------------------------------------------------------------------|---------------------------------------------------------------------------------------------------|
| <b>PULSE SEQUENCE</b><br>Relax. delay 2.000 sec<br>Pulse 30.0 degrees<br>Acq. time 1.311 sec<br>Width 25000.0 Hz<br>80 repetitions | <b>OBSERVE</b> C13, 100.6017427<br><b>DECOUPLE</b> H1, 400.0881319<br>Power 35 dB<br>continuously on<br><b>WALTZ-16</b> modulated | <b>DATA PROCESSING</b><br>Line broadening 0.5 Hz<br>FT size 65536<br>Total time 4 minutes | jpm 12 Dec 2013<br>SDACC1Toluene                                                                  |
|                                                                                                                                    |                                                                                                                                   |                                                                                           | Solvent: cdcl3<br>Ambient temperature<br>Operator: moerdj<br>File: CARBON_01<br>VMRS-400 "nhb400" |



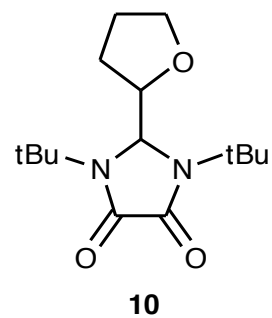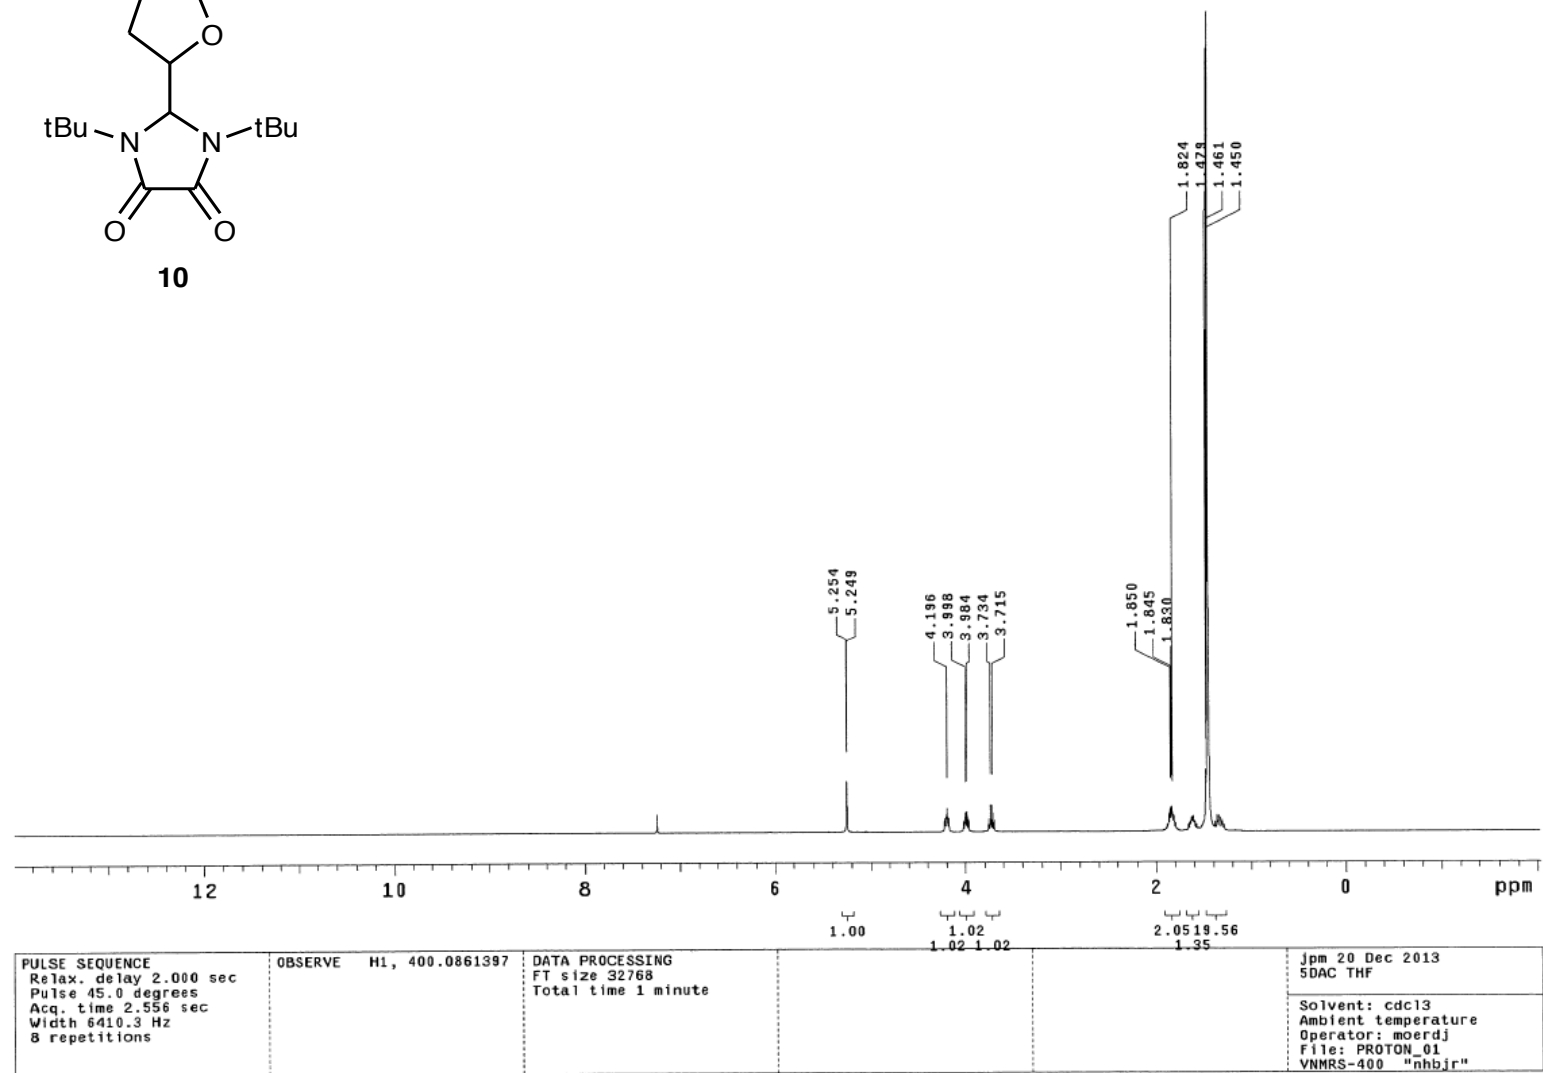

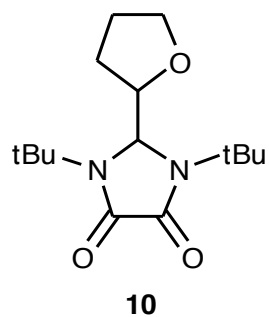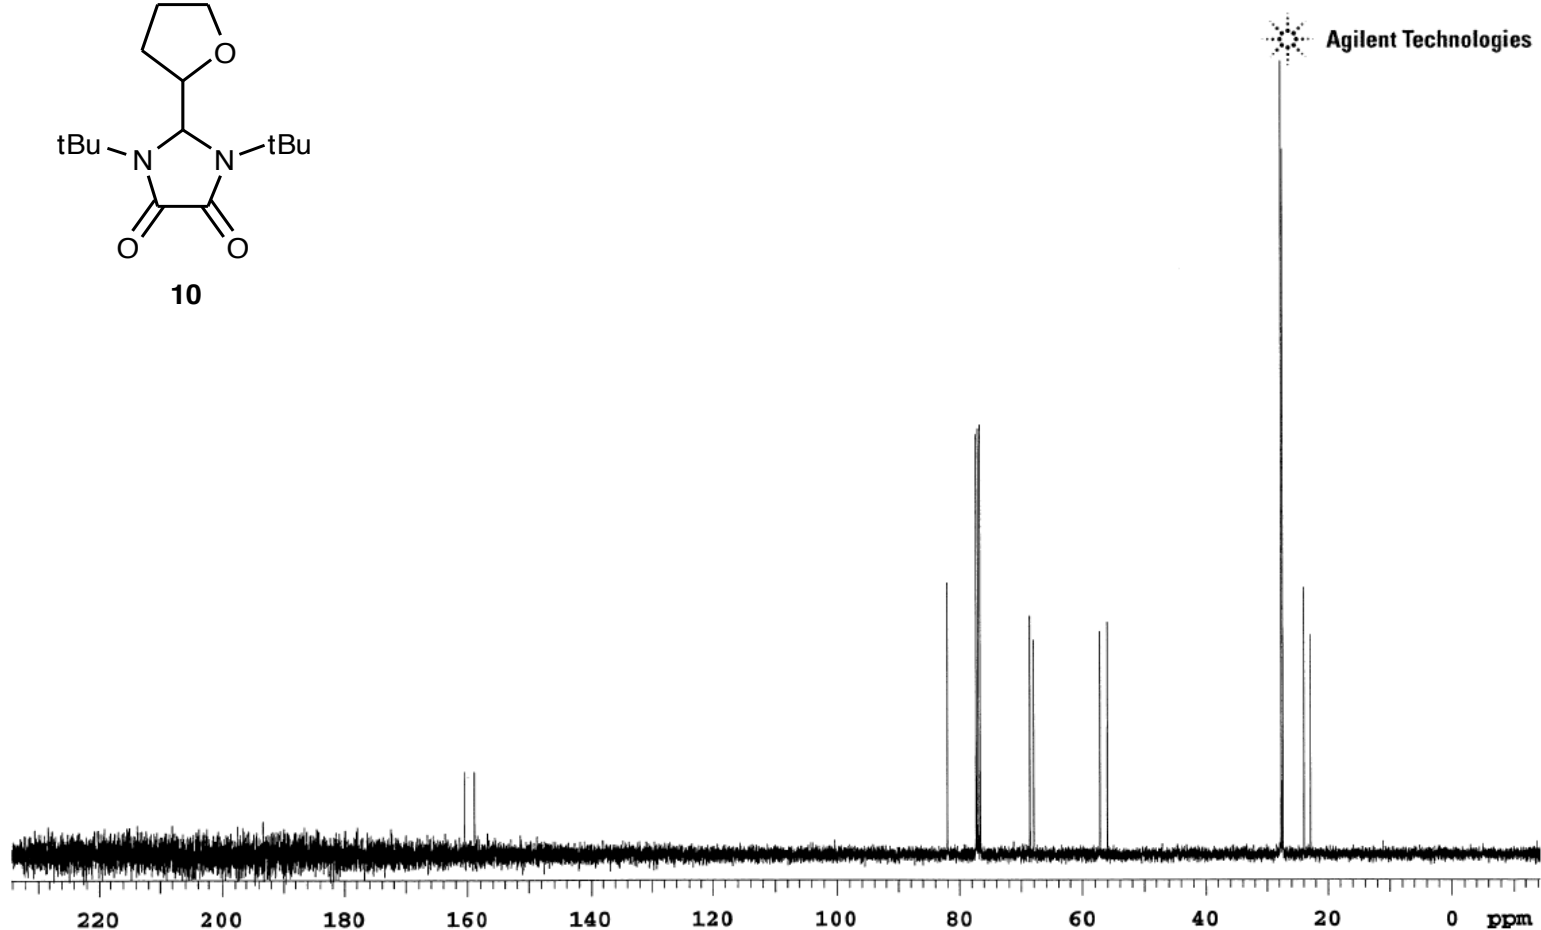

|                                                                                                                                     |                                                                                                                            |                                                                                            |                                                                                                                |
|-------------------------------------------------------------------------------------------------------------------------------------|----------------------------------------------------------------------------------------------------------------------------|--------------------------------------------------------------------------------------------|----------------------------------------------------------------------------------------------------------------|
| <b>PULSE SEQUENCE</b><br>Relax. delay 2.000 sec<br>Pulse 30.0 degrees<br>Acq. time 1.311 sec<br>Width 25000.0 Hz<br>224 repetitions | <b>OBSERVE</b> C13, 100.6017435<br><b>DECOUPLE</b> H1, 400.0881319<br>Power 35 dB<br>continuously on<br>WALTZ-16 modulated | <b>DATA PROCESSING</b><br>Line broadening 0.5 Hz<br>FT size 65536<br>Total time 12 minutes | jpm 20 Dec 2013<br>5DAC THF<br>Solvent: cdcl3<br>Ambient temperature<br>Operator: moerdj<br>VNMR5-400 "nhb400" |
|-------------------------------------------------------------------------------------------------------------------------------------|----------------------------------------------------------------------------------------------------------------------------|--------------------------------------------------------------------------------------------|----------------------------------------------------------------------------------------------------------------|

**DFT Calculations.** The DFT calculations were performed at the B3LYP/6-31g\* level of theory using the Spartan'14 software package (v.1.1.3). Vibrational frequencies were calculated to identify the optimized structures as energy minima as well as to calculate the zero point energies. Truncated forms of the five- and six-membered DACs were also calculated for comparison. Key results are summarized in Table S3 and Cartesian coordinates are given in Tables S4 – S11.

**Table S3.** Summary of calculated structures and thermodynamic values.<sup>a</sup>

| Carbene                                                                                                        | Ketene                                                                              | $\Delta H$ | $\Delta G$ | $\Delta H$ | $\Delta G$ |
|----------------------------------------------------------------------------------------------------------------|-------------------------------------------------------------------------------------|------------|------------|------------|------------|
|                                                                                                                |                                                                                     | (298 K)    | (298 K)    | (195 K)    | (195 K)    |
|                                                                                                                |                                                                                     | (kcal/mol) | (kcal/mol) | (kcal/mol) | (kcal/mol) |
| 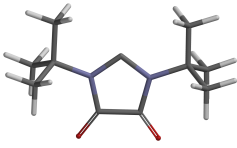<br><b>2a</b>                 |    | -6.21      | 6.25       | -5.99      | 1.88       |
| <br><b>6DAC</b>              |   | -12.2      | -0.08      | -12.0      | -4.34      |
| <br><b>5DAC (truncated)</b> |  | -12.3      | -1.80      | -12.2      | -5.69      |
| <br><b>6DAC (truncated)</b> |  | -11.3      | -0.16      | -11.1      | -4.07      |

<sup>a</sup> Change in enthalpy or Gibbs free energy calculated for the reaction: DAC + CO  $\rightarrow$  DAC-CO.

**Table S4.** Cartesian coordinates (Angstroms) for **2a**.

| Atom | x          | y          | z          |
|------|------------|------------|------------|
| C    | 0.0140318  | -0.8644076 | 0.0000000  |
| N    | 0.0129201  | -0.0421836 | -1.1054858 |
| N    | 0.0129201  | -0.0421836 | 1.1054858  |
| C    | 0.0062202  | 1.3130753  | 0.7735483  |
| C    | 0.0062202  | 1.3130753  | -0.7735483 |
| O    | -0.0006152 | 2.2879631  | -1.4886180 |
| O    | -0.0006152 | 2.2879631  | 1.4886180  |
| C    | -0.0008231 | -0.5553782 | -2.5161852 |
| C    | -1.2852724 | -0.0550198 | -3.2023695 |
| H    | -1.3287179 | 1.0365460  | -3.2222054 |
| H    | -2.1718672 | -0.4341480 | -2.6819846 |
| H    | -1.3160712 | -0.4182113 | -4.2352980 |
| C    | 1.2509636  | -0.0266895 | -3.2411926 |
| H    | 1.2574383  | 1.0650163  | -3.2838657 |
| H    | 1.2709952  | -0.4118989 | -4.2663609 |
| H    | 2.1614882  | -0.3648834 | -2.7340148 |
| C    | 0.0175259  | -2.0881873 | -2.4952567 |
| H    | -0.8520009 | -2.4959341 | -1.9736923 |
| H    | 0.9113824  | -2.4737439 | -1.9980765 |
| H    | 0.0080538  | -2.4447424 | -3.5309820 |
| C    | -0.0008231 | -0.5553782 | 2.5161852  |
| C    | -1.2852724 | -0.0550198 | 3.2023695  |
| H    | -1.3287179 | 1.0365460  | 3.2222054  |
| H    | -1.3160712 | -0.4182113 | 4.2352980  |
| H    | -2.1718672 | -0.4341480 | 2.6819846  |
| C    | 0.0175259  | -2.0881873 | 2.4952567  |
| H    | -0.8520009 | -2.4959341 | 1.9736923  |
| H    | 0.0080538  | -2.4447424 | 3.5309820  |
| H    | 0.9113824  | -2.4737439 | 1.9980765  |
| C    | 1.2509636  | -0.0266895 | 3.2411926  |
| H    | 1.2574383  | 1.0650163  | 3.2838657  |
| H    | 2.1614882  | -0.3648834 | 2.7340148  |
| H    | 1.2709952  | -0.4118989 | 4.2663609  |

**Table S5.** Cartesian coordinates (Angstroms) for **2a**–CO.

| Atom | x          | y          | z          |
|------|------------|------------|------------|
| C    | -0.0000100 | -0.6502713 | 0.0546126  |
| N    | -1.1514757 | 0.1881901  | 0.0648441  |
| N    | 1.1521335  | 0.1870549  | 0.0728979  |
| C    | 0.7615329  | 1.4983202  | 0.2651209  |
| C    | -0.7615584 | 1.4985880  | 0.2628135  |
| O    | -1.4748624 | 2.4835629  | 0.3472445  |
| O    | 1.4746516  | 2.4835539  | 0.3477330  |
| C    | -2.5833135 | -0.1994251 | -0.1932762 |
| C    | -3.0772662 | 0.5937806  | -1.4197322 |
| H    | -2.5095472 | 0.3136231  | -2.3142502 |
| H    | -2.9773964 | 1.6681521  | -1.2591314 |
| H    | -4.1332572 | 0.3642957  | -1.5987852 |
| C    | -2.7067257 | -1.6985869 | -0.4923666 |
| H    | -2.0606361 | -2.0132109 | -1.3179822 |
| H    | -3.7410175 | -1.8996749 | -0.7885522 |
| H    | -2.5020480 | -2.3195734 | 0.3843089  |
| C    | -3.4104300 | 0.1468371  | 1.0586793  |
| H    | -3.3516984 | 1.2144436  | 1.2785777  |
| H    | -3.0487493 | -0.4147176 | 1.9273795  |
| H    | -4.4604262 | -0.1194595 | 0.8937617  |
| C    | 2.5829635  | -0.1989747 | -0.1931508 |
| C    | 3.0654396  | 0.5865024  | -1.4291681 |
| H    | 2.4892268  | 0.2998969  | -2.3161503 |
| H    | 4.1198135  | 0.3565007  | -1.6169333 |
| H    | 2.9660061  | 1.6618523  | -1.2744916 |
| C    | 3.4190508  | 0.1584752  | 1.0496977  |
| H    | 3.3606417  | 1.2276612  | 1.2616269  |
| H    | 4.4676985  | -0.1085270 | 0.8782236  |
| H    | 3.0644012  | -0.3962549 | 1.9256196  |
| C    | 2.7095285  | -1.6999985 | -0.4823741 |
| H    | 2.0595677  | -2.0225528 | -1.3019595 |
| H    | 2.5145989  | -2.3171465 | 0.3993889  |
| H    | 3.7424917  | -1.8980572 | -0.7851952 |
| C    | -0.0009794 | -1.9152782 | 0.5102904  |
| O    | 0.0010024  | -3.0850891 | 0.6442066  |

**Table S6.** Cartesian coordinates (Angstroms) for **6DAC**.

| Atom | x          | y          | z          |
|------|------------|------------|------------|
| N    | 1.1573004  | 0.4557478  | 0.0018860  |
| N    | -1.1546927 | 0.4491208  | 0.0179445  |
| C    | -2.3842301 | -0.3333987 | 0.0271531  |
| C    | -4.7126715 | -1.8806171 | 0.0372092  |
| C    | -2.8318441 | -0.8821592 | 1.2369721  |
| C    | -3.0759421 | -0.5286691 | -1.1745893 |
| C    | -4.2373251 | -1.3076858 | -1.1447913 |
| C    | -3.9969862 | -1.6522341 | 1.2168740  |
| H    | -4.7816975 | -1.4698189 | -2.0728072 |
| H    | -4.3532017 | -2.0854070 | 2.1493461  |
| C    | 2.3886829  | -0.3236022 | -0.0289022 |
| C    | 4.7169848  | -1.8702210 | -0.1070791 |
| C    | 2.8625408  | -0.7805440 | -1.2666839 |
| C    | 3.0524372  | -0.6140642 | 1.1702412  |
| C    | 4.2141621  | -1.3898154 | 1.1045456  |
| C    | 4.0274998  | -1.5517225 | -1.2809978 |
| H    | 4.7376442  | -1.6244585 | 2.0291020  |
| H    | 4.4029025  | -1.9136810 | -2.2360384 |
| C    | -1.2818815 | 1.8498988  | 0.1843321  |
| C    | 1.2824905  | 1.8610943  | 0.1123993  |
| O    | 2.3645155  | 2.3961676  | 0.2439579  |
| O    | -2.3570022 | 2.3673349  | 0.4075117  |
| C    | -0.0080365 | 2.6683663  | -0.0041137 |
| C    | 0.0155117  | 3.8371630  | 0.9985779  |
| H    | 0.0425973  | 3.4712156  | 2.0303312  |
| H    | -0.8842041 | 4.4428043  | 0.8741582  |
| H    | 0.9041519  | 4.4480387  | 0.8280003  |
| C    | -0.0510937 | 3.2232198  | -1.4596453 |
| H    | -0.9434415 | 3.8439145  | -1.5819178 |
| H    | -0.0820072 | 2.4163818  | -2.1998210 |
| H    | 0.8410251  | 3.8298780  | -1.6395528 |
| C    | -2.5882635 | 0.0704138  | -2.4716152 |
| H    | -2.5958640 | 1.1669497  | -2.4370699 |
| H    | -3.2266872 | -0.2384825 | -3.3044892 |
| H    | -1.5624648 | -0.2445066 | -2.6977613 |
| C    | -2.0743907 | -0.6652885 | 2.5239367  |
| H    | -2.5775405 | -1.1612024 | 3.3591084  |
| H    | -1.9927722 | 0.4009551  | 2.7680151  |
| H    | -1.0563669 | -1.0668014 | 2.4521005  |
| C    | -5.9495683 | -2.7481260 | 0.0403784  |

|   |            |            |            |
|---|------------|------------|------------|
| H | -6.5639842 | -2.5689068 | 0.9298898  |
| H | -5.6862010 | -3.8142688 | 0.0394832  |
| H | -6.5710650 | -2.5644738 | -0.8421636 |
| C | 2.5433611  | -0.1116683 | 2.4991514  |
| H | 2.6566728  | 0.9760771  | 2.5806945  |
| H | 3.0977351  | -0.5685446 | 3.3242020  |
| H | 1.4811226  | -0.3440485 | 2.6372357  |
| C | 5.9541761  | -2.7364443 | -0.1464328 |
| H | 6.5683606  | -2.5214955 | -1.0280656 |
| H | 5.6913395  | -3.8019525 | -0.1877912 |
| H | 6.5755477  | -2.5878109 | 0.7427673  |
| C | 2.1305508  | -0.4724926 | -2.5499930 |
| H | 2.0103869  | 0.6075473  | -2.7004640 |
| H | 1.1270975  | -0.9155499 | -2.5436609 |
| H | 2.6737189  | -0.8709204 | -3.4119545 |
| C | 0.0019748  | -0.2753251 | -0.0521685 |

**Table S7.** Cartesian coordinates (Angstroms) for **6DAC**–CO.

| Atom | x          | y          | z          |
|------|------------|------------|------------|
| N    | 1.2205205  | 0.5749604  | 0.1601005  |
| N    | -1.2168502 | 0.5844339  | 0.1350377  |
| C    | -2.4313266 | -0.2008415 | 0.0527270  |
| C    | -4.7386707 | -1.7735905 | -0.1389824 |
| C    | -2.8546062 | -0.9319755 | 1.1724800  |
| C    | -3.1615269 | -0.2026274 | -1.1489902 |
| C    | -4.3051357 | -1.0014040 | -1.2219181 |
| C    | -4.0060765 | -1.7161441 | 1.0491227  |
| H    | -4.8755469 | -1.0132007 | -2.1484265 |
| H    | -4.3421922 | -2.2898479 | 1.9099976  |
| C    | 2.4298636  | -0.2178146 | 0.0819256  |
| C    | 4.7432967  | -1.7850207 | -0.1018012 |
| C    | 3.2301226  | -0.1272624 | -1.0698475 |
| C    | 2.7768916  | -1.0560495 | 1.1546346  |
| C    | 3.9348159  | -1.8289137 | 1.0380593  |
| C    | 4.3777961  | -0.9227388 | -1.1387700 |
| H    | 4.2156791  | -2.4774505 | 1.8652822  |
| H    | 5.0050128  | -0.8591756 | -2.0252152 |
| C    | -1.2900802 | 1.9363003  | 0.4206534  |
| C    | 1.2996124  | 1.9310366  | 0.4297437  |
| O    | 2.3592481  | 2.4516607  | 0.7440065  |
| O    | -2.3490923 | 2.4579721  | 0.7363337  |

|   |            |            |            |
|---|------------|------------|------------|
| C | 0.0064965  | 2.7486105  | 0.2851159  |
| C | 0.0065807  | 3.8723541  | 1.3366364  |
| H | 0.0074217  | 3.4610468  | 2.3512740  |
| H | -0.8890186 | 4.4847192  | 1.2174352  |
| H | 0.9015763  | 4.4854075  | 1.2166043  |
| C | 0.0095357  | 3.3692925  | -1.1407785 |
| H | -0.8774678 | 3.9977447  | -1.2654840 |
| H | 0.0024365  | 2.6012371  | -1.9219951 |
| H | 0.9040215  | 3.9863171  | -1.2684923 |
| C | -2.7686586 | 0.6712058  | -2.3175744 |
| H | -2.9448696 | 1.7281480  | -2.0826659 |
| H | -3.3609830 | 0.4210436  | -3.2023441 |
| H | -1.7110617 | 0.5657485  | -2.5822230 |
| C | -2.1216606 | -0.8474284 | 2.4879409  |
| H | -2.6075945 | -1.4734894 | 3.2418685  |
| H | -2.1092816 | 0.1838619  | 2.8598120  |
| H | -1.0802847 | -1.1739731 | 2.3992789  |
| C | -5.9717130 | -2.6384477 | -0.2559797 |
| H | -6.8440171 | -2.0501093 | -0.5653670 |
| H | -6.2135031 | -3.1218419 | 0.6955514  |
| H | -5.8337525 | -3.4275466 | -1.0058000 |
| C | 1.9412528  | -1.1228275 | 2.4083320  |
| H | 1.6195535  | -0.1271581 | 2.7287909  |
| H | 2.5070742  | -1.5800536 | 3.2253479  |
| H | 1.0377052  | -1.7262364 | 2.2552225  |
| C | 5.9711062  | -2.6578859 | -0.2118841 |
| H | 6.4641110  | -2.7792561 | 0.7586559  |
| H | 6.6998607  | -2.2384520 | -0.9129915 |
| H | 5.7111864  | -3.6623159 | -0.5718871 |
| C | 2.9020957  | 0.8316056  | -2.1892808 |
| H | 3.0857287  | 1.8657769  | -1.8743567 |
| H | 1.8527303  | 0.7628141  | -2.4962304 |
| H | 3.5225247  | 0.6292927  | -3.0669370 |
| C | 0.0031359  | -0.0447492 | -0.2190516 |
| C | 0.0093662  | -1.1259338 | -1.0118035 |
| O | 0.0113663  | -2.1897969 | -1.5184567 |

---



**Table S8.** Cartesian coordinates (Angstroms) for **5DAC** (truncated).

| Atom | x          | y         | z          |
|------|------------|-----------|------------|
| N    | 1.0800255  | 0.0000000 | -0.9489894 |
| C    | 0.0000000  | 0.0000000 | -1.8043785 |
| N    | -1.0800255 | 0.0000000 | -0.9489894 |
| C    | -0.7764145 | 0.0000000 | 0.4138059  |
| C    | 0.7764145  | 0.0000000 | 0.4138059  |
| O    | -1.5237403 | 0.0000000 | 1.3582681  |
| O    | 1.5237403  | 0.0000000 | 1.3582681  |
| H    | 2.0318139  | 0.0000000 | -1.2929189 |
| H    | -2.0318139 | 0.0000000 | -1.2929189 |

**Table S9.** Cartesian coordinates (Angstroms) for **5DAC** (truncated)–CO.

| Atom | x          | y          | z          |
|------|------------|------------|------------|
| N    | -0.1107628 | 0.0073466  | 1.1231056  |
| C    | -0.9624937 | 0.0142984  | 0.0000000  |
| N    | -0.1107628 | 0.0073466  | -1.1231056 |
| C    | 1.2267524  | -0.0017433 | -0.7687926 |
| C    | 1.2267524  | -0.0017433 | 0.7687926  |
| O    | 2.1800033  | -0.0054024 | -1.5158517 |
| O    | 2.1800033  | -0.0054024 | 1.5158517  |
| C    | -2.2847868 | -0.0115025 | 0.0000000  |
| O    | -3.4639050 | -0.0059750 | 0.0000000  |
| H    | -0.4277385 | 0.0177645  | 2.0818754  |
| H    | -0.4277385 | 0.0177645  | -2.0818754 |

**Table S10.** Cartesian coordinates (Angstroms) for **6DAC** (truncated).

| Atom | x          | y          | z          |
|------|------------|------------|------------|
| N    | 1.1332145  | 0.0000000  | -1.0440642 |
| C    | 0.0000000  | 0.0000000  | -1.8050694 |
| N    | -1.1332145 | 0.0000000  | -1.0440642 |
| C    | -1.2936735 | 0.0000000  | 0.3517650  |
| C    | 1.2936735  | 0.0000000  | 0.3517650  |
| O    | 2.3916497  | 0.0000000  | 0.8649013  |
| O    | -2.3916497 | 0.0000000  | 0.8649013  |
| C    | 0.0000000  | 0.0000000  | 1.1447116  |
| H    | 0.0000000  | -0.8718528 | 1.8099297  |
| H    | 0.0000000  | 0.8718528  | 1.8099297  |

|   |            |           |            |
|---|------------|-----------|------------|
| H | -2.0132056 | 0.0000000 | -1.5502071 |
| H | 2.0132056  | 0.0000000 | -1.5502071 |

**Table S11.** Cartesian coordinates (Angstroms) for **6DAC** (truncated)–CO.

| Atom | x          | y          | z          |
|------|------------|------------|------------|
| N    | -0.2782762 | -0.4798814 | 1.2126695  |
| C    | -1.0053358 | -0.3858042 | 0.0000000  |
| N    | -0.2782762 | -0.4798814 | -1.2126695 |
| C    | 0.9980492  | 0.0635772  | -1.2686033 |
| C    | 0.9980492  | 0.0635772  | 1.2686033  |
| O    | 1.7490849  | -0.1105057 | 2.2067281  |
| O    | 1.7490849  | -0.1105057 | -2.2067281 |
| C    | 1.3506844  | 0.8486339  | 0.0000000  |
| H    | 0.7845631  | 1.7912723  | 0.0000000  |
| H    | 2.4157546  | 1.0752383  | 0.0000000  |
| C    | -2.2330680 | 0.1545888  | 0.0000000  |
| O    | -3.3671893 | 0.4403915  | 0.0000000  |
| H    | -0.5012844 | -1.1853242 | 1.9066447  |
| H    | -0.5012844 | -1.1853242 | -1.9066447 |

## References

- S1 H. J. Bestmann, J. Lienert and L. Mott, *Justus Liebigs Ann. Chem.*, 1968, **718**, 24.
- S2 R. E. Cowley, N. A. Eckert, J. Elhaïk and P. L. Holland. *Chem. Commun.*, 2009, 1760.
- S3 C. Palomo and R. Mestres, *Synthesis*, 1981, 373.
- S4 G. Zinner and R. Vollrath, *Chem. Ber.*, 1970, **103**, 766.
- S5 Z. Otwinowski and W. Minor, Methods. In *Enzymology in Macromolecular Crystallography, Part A*; Carter, C. W., Jr; Sweets, R. M., Eds. (Academic Press, 1997); Vol. 276, pp 307–326.
- S6 Sheldrick, G. M. SHELXL/PC package (version 5.1), program for the refinement of crystal structures, University of Gottingen, Germany, 2003.
